# Supplementary material for: Copper-catalysed dehydrogenative self-coupling/cyclization of 5-aminopyrazoles: synthesis and photophysical study of pyridazines
Source: Royal Society of Chemistry journal article supplement (doi:10.1039/d3cc02424e), 2023-01-01
Supplement: d3cc02424e1.pdf [file d3cc02424e1.pdf]

## Electronic Supplementary Information

### **Copper catalysed dehydrogenative self-coupling/cyclization of 5-aminopyrazoles: Synthesis and photophysical study of pyridazines**

Gaurav K. Rastogi,<sup>[a, b]</sup> Mohit L. Deb,<sup>\*[a, c]</sup> and Pranjal K. Baruah<sup>\*[a]</sup>

<sup>[a]</sup>Department of Applied Sciences, GUIST, Gauhati University, Guwahati-781014, Assam, India.

<sup>[b]</sup>Department of Applied Organic Chemistry, CSIR-NEIST, Jorhat 785006, Assam (India).

<sup>[c]</sup>Advanced Research Centre and Department of Chemistry, University of Science and Technology Meghalaya, Ri-Bhoi, Meghalaya-793101, India.

E-mail: [mohitdd.deb@gmail.com](mailto:mohitdd.deb@gmail.com); [baruah.pranjal@gmail.com](mailto:baruah.pranjal@gmail.com)

| <b>Table of contents</b>                                         | <b>Page No.</b> |
|------------------------------------------------------------------|-----------------|
| General Information                                              | 2               |
| Table S1-S3                                                      | 2-3             |
| Scheme S1: Synthesis of <b>4a-c</b>                              | 4               |
| Schemes S2-S4: Synthesis of <b>1a-h</b>                          | 4               |
| Single crystal structure of <b>2j</b>                            | 5               |
| Measurement of fluorescent quantum yields ( $\Phi_F$ ) & Fig. S2 | 5               |
| General experimental procedure                                   | 6-7             |
| Characterization of the Products                                 | 8-14            |
| References                                                       | 15              |
| NMR Spectra of the Products                                      | 16-45           |
| NMR Spectra of <b>3a</b> showing cis to trans conversion         | 46              |
| HRMS of reaction intermediates                                   | 47-51           |

## General information

All the commercially available reagents were used as received. Melting points were determined in open capillary tubes with a Buchi-540 micro melting point apparatus and were uncorrected. IR spectra were recorded on a Perkin-Elmer system 2000 FT-IR spectrometer. HRMS data were recorded by electrospray ionization with a Q-TOF mass analyzer (Waters). NMR spectra were recorded on Bruker-500 (125) MHz and Jeol-400 (100) MHz NMR spectrometer with tetramethylsilane (TMS) as the internal standard. Chemical shifts ( $\delta$ ) are quoted in ppm and coupling constants ( $J$ ) are measured in Hertz (Hz). All the experiments were monitored by thin layer chromatography (TLC) on pre-coated silica gel plates (Merck) and visualized under UV lamp at 254 nm for UV active materials. Further visualization was achieved by iodine vapour. Column chromatography was performed on silica gel (100-200 mesh, Merck) using ethyl acetate/hexane as eluent. Crystal data were recorded using Single Crystal X-ray Diffractometer [model: Single source supernova E (Mo Source); make Agilent]. Photophysical properties of all the samples were evaluated on HITACHI (U-3900) UV-Visible spectrophotometer and Horiba (Fluorolog-3) fluorescence spectrophotometer.

**Table S1**

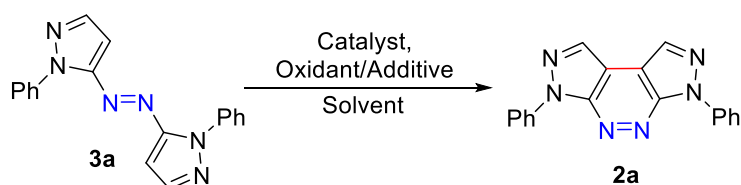

| Sl. No. | Catalyst (mol%)                             | Oxidants/ Additives (eq.)           | Time (h) | Solvent          | Temp (°C) | Yields (%) |
|---------|---------------------------------------------|-------------------------------------|----------|------------------|-----------|------------|
| 1       | Cu(OAc) <sub>2</sub> .H <sub>2</sub> O (10) | -                                   | 6        | Toluene          | 120       | ND         |
| 2       | CuBr (10)                                   | -                                   | 6        | Toluene          | 120       | ND         |
| 3       | Cu(OAc) <sub>2</sub> .H <sub>2</sub> O (10) | TBHP (1)                            | 6        | Toluene          | 120       | ND         |
| 4       | Cu(OAc) <sub>2</sub> .H <sub>2</sub> O (10) | H <sub>2</sub> O <sub>2</sub> (1)   | 6        | Toluene          | 120       | ND         |
| 5       | Cu(OAc) <sub>2</sub> .H <sub>2</sub> O (10) | Ag <sub>2</sub> CO <sub>3</sub> (1) | 6        | Toluene          | 120       | ND         |
| 6       | Pd(OAc) <sub>2</sub> (10)                   | TBHP (1)                            | 6        | Toluene          | 120       | ND         |
| 7       | CuBr (10)                                   | PhCO <sub>2</sub> H (1)             | 6        | Toluene          | 120       | ND         |
| 8       | CuBr (10)                                   | PhCO <sub>2</sub> H (1)             | 6        | <i>p</i> -Xylene | 130       | ND         |
| 9       | CuBr (10)                                   | PhCO <sub>2</sub> H (1)             | 6        | DMSO             | 130       | ND         |

ND – not detected

**Table S2**

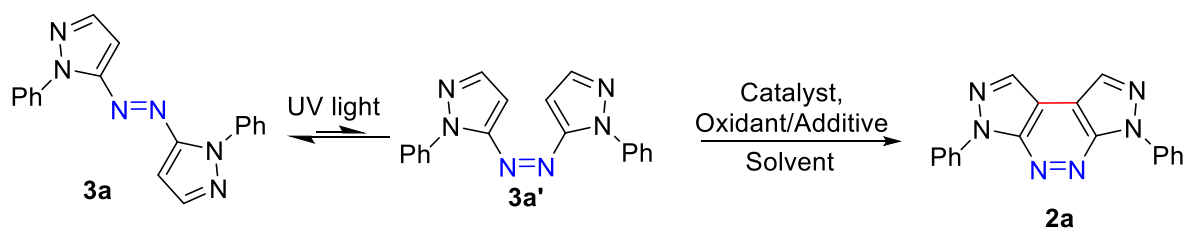

| Sl. No. | Catalyst (mol%)                             | Oxidants/ Additives (eq.)           | Time (h) | Solvent  | Temp (°C) | Yields (%) |
|---------|---------------------------------------------|-------------------------------------|----------|----------|-----------|------------|
| 1       | Cu(OAc) <sub>2</sub> .H <sub>2</sub> O (10) | -                                   | 6        | Toluene  | 120       | ND         |
| 2       | CuBr (10)                                   | -                                   | 6        | Toluene  | 120       | ND         |
| 3       | Cu(OAc) <sub>2</sub> .H <sub>2</sub> O (10) | TBHP (1)                            | 6        | Toluene  | 120       | ND         |
| 4       | Cu(OAc) <sub>2</sub> .H <sub>2</sub> O (10) | H <sub>2</sub> O <sub>2</sub> (1)   | 6        | Toluene  | 120       | ND         |
| 5       | Cu(OAc) <sub>2</sub> .H <sub>2</sub> O (10) | Ag <sub>2</sub> CO <sub>3</sub> (1) | 6        | Toluene  | 120       | ND         |
| 6       | Pd(OAc) <sub>2</sub> (10)                   | TBHP (1)                            | 6        | Toluene  | 120       | ND         |
| 7       | CuBr (10)                                   | PhCO <sub>2</sub> H (1)             | 6        | Toluene  | 120       | ND         |
| 8       | CuBr (10)                                   | PhCO <sub>2</sub> H (1)             | 6        | p-Xylene | 130       | ND         |
| 9       | CuBr (10)                                   | PhCO <sub>2</sub> H (1)             | 6        | DMSO     | 130       | ND         |

All the reactions were carried out in the presence of UV light (11 W)

**Table S3** Optimization of the reaction<sup>a</sup>

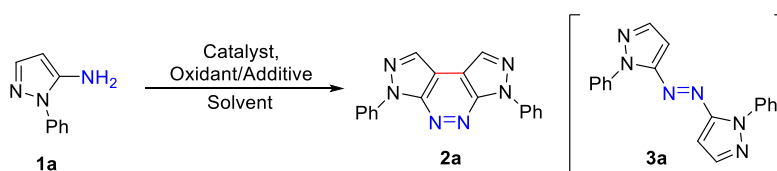

| Sl. No.               | Catalyst (mol%)                             | Oxidants/ Additives (eq.)         | Time (h) | Solvent        | Temp (°C)  | Yields (%) <sup>b</sup> |           |
|-----------------------|---------------------------------------------|-----------------------------------|----------|----------------|------------|-------------------------|-----------|
|                       |                                             |                                   |          |                |            | 2a                      | 3a        |
| 1                     | Cu(OAc) <sub>2</sub> .H <sub>2</sub> O (10) | TBHP (1)                          | 6        | Toluene        | 120        | --                      | 62        |
| 2                     | Cu(OAc) <sub>2</sub> .H <sub>2</sub> O (10) | H <sub>2</sub> O <sub>2</sub> (1) | 6        | Toluene        | 120        | --                      | 50        |
| 3                     | Cu(OAc) <sub>2</sub> .H <sub>2</sub> O (10) | AgOAc (1)                         | 6        | Toluene        | 120        | --                      | 56        |
| 4                     | Cu(OAc) <sub>2</sub> .H <sub>2</sub> O (10) | SC (1)                            | 6        | Toluene        | 120        | --                      | 57        |
| 5                     | Pd(OAc) <sub>2</sub> (10)                   | TBHP (1)                          | 6        | Toluene        | 120        | --                      | --        |
| 6                     | FeCl <sub>3</sub> (10)                      | TBHP (1)                          | 6        | Toluene        | 120        | --                      | --        |
| 7 <sup>c</sup>        | FeCl <sub>3</sub> (10)                      | CuBr (1)                          | 6        | Toluene        | 120        | --                      | --        |
| 8                     | CuBr (10)                                   | --                                | 6        | Toluene        | 120        | --                      | 66        |
| 9                     | CuBr (10)                                   | SC (1)                            | 6        | Toluene        | 120        | --                      | 65        |
| 10                    | CuBr (10)                                   | SC(1)+BA(1)                       | 6        | Toluene        | 120        | 60                      | --        |
| 11                    | CuBr (10)                                   | SC(1)+BA(1)                       | 6        | Toluene        | 130        | 66                      | --        |
| <b>12<sup>d</sup></b> | <b>CuBr (10)</b>                            | <b>SC(1)+BA(1)</b>                | <b>6</b> | <b>Toluene</b> | <b>130</b> | <b>78</b>               | <b>--</b> |
| 13                    | CuBr <sub>2</sub> (10)                      | SC(1)+BA(1)                       | 6        | Toluene        | 130        | 25                      | --        |
| 14                    | Cu(OAc) <sub>2</sub> .H <sub>2</sub> O (10) | SC(1)+BA(1)                       | 6        | Toluene        | 130        | 17                      | --        |
| 15                    | CuBr (10)                                   | SC(1)+PNBA (1)                    | 6        | Toluene        | 130        | 33                      | -         |
| 16                    | CuBr (10)                                   | SC(1)+AcOH (1)                    | 6        | Toluene        | 130        | --                      | --        |
| 17                    | CuBr (10)                                   | SC(1)+HCO <sub>2</sub> H(1)       | 6        | Toluene        | 130        | --                      | --        |
| 18                    | CuBr (10)                                   | SC(1)+BA(1)                       | 6        | p-Xylene       | 130        | 36                      | --        |
| 19                    | CuBr (10)                                   | SC(1)+BA(1)                       | 6        | DMSO           | 130        | 28                      | 10        |
| 20                    | CuBr (5)                                    | SC(1)+BA(1)                       | 6        | Toluene        | 130        | 74                      | --        |
| 21                    | CuBr (15)                                   | SC(1)+BA(1)                       | 6        | Toluene        | 130        | 68                      | --        |
| 22                    | CuBr (10)                                   | SC(1)+BA(0.5)                     | 6        | Toluene        | 130        | 41                      | --        |
| 23                    | CuBr (10)                                   | SC(0.5)+BA(1)                     | 6        | Toluene        | 130        | 35                      | --        |
| 24                    | CuBr (10)                                   | SC(1.5)+BA (1.5)                  | 6        | Toluene        | 130        | 75                      | --        |
| 25                    | CuBr (10)                                   | SC(1)+BA(1)                       | 6        | Toluene        | 140        | 78                      | --        |
| 26                    | CuBr (10)                                   | SC(1)+BA(1)                       | 7        | Toluene        | 130        | 72                      | --        |

<sup>a</sup>All the reactions were performed using 0.5 mmol of **1a**. Unless mentioned 3 mL of solvent was used in each case. <sup>b</sup>Yields are for isolated products. <sup>c</sup>Isolated 4-bromo substituted 1-phenyl-1*H*-pyrazol-5-amine product (Scheme SI-1). <sup>d</sup>Reaction was performed in pressure tube and all the subsequent reactions were performed similarly. PNBA is 4-nitrobenzoic acid, SC is silver carbonate and BA is benzoic acid.

### Scheme S1. Synthesis of 4-halo substituted 5-aminopyrazole

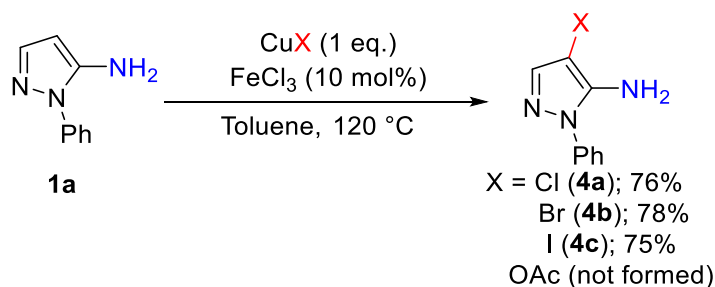

### Schemes for synthesis of 1a-h

#### Scheme S2

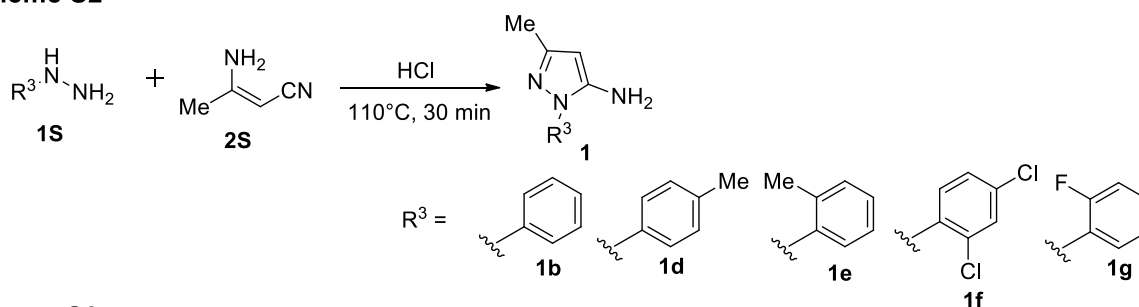

#### Scheme S3

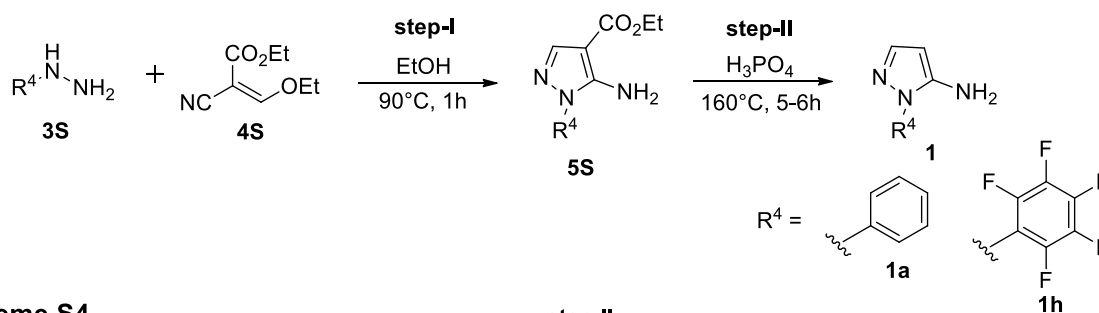

#### Scheme S4

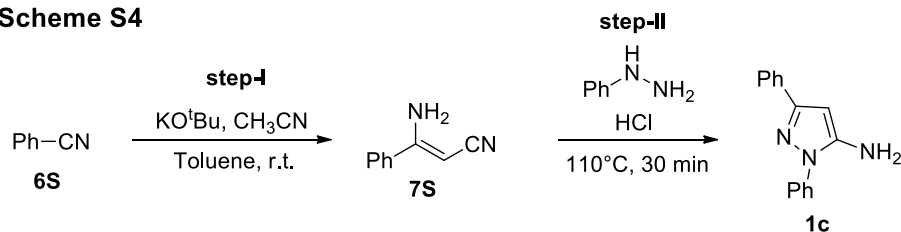

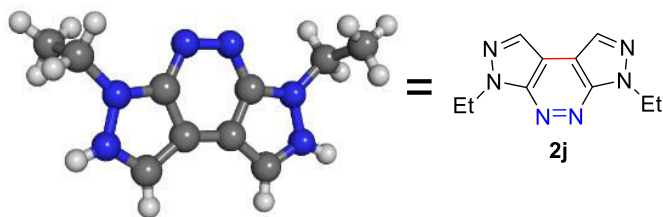

**Fig. S1.** Single crystal structure of **2j** (CCDC number- 2262732)

### Measurement of fluorescent quantum yields ( $\Phi_F$ )

Fluorescence quantum yield ( $\Phi_F$ ) of all synthesized compounds was calculated according to the equation 1. In this calculation quinine sulfate (0.5 M H<sub>2</sub>SO<sub>4</sub> solution) is taken as internal standard.

$$\Phi_{sample} = \Phi_{ref} \left( \frac{A_{sample}}{A_{ref}} \right) \times \left( \frac{OD_{ref}}{OD_{sample}} \right) \times \left( \frac{n_{ref}}{n_{sample}} \right) \quad \text{Equation 1}$$

$\Phi_{sample}$  = Quantum yield of the sample

$\Phi_{ref}$  = Quantum yield of the reference

$A_{sample}$  = area under the emission spectra of the sample

$A_{ref}$  = area under the emission spectra of the reference

$OD_{ref}$  = absorbance of the reference

$OD_{sample}$  = absorbance of the sample

$n_{ref}$  = refractive index of the sample

$n_{sample}$  = refractive index of the reference

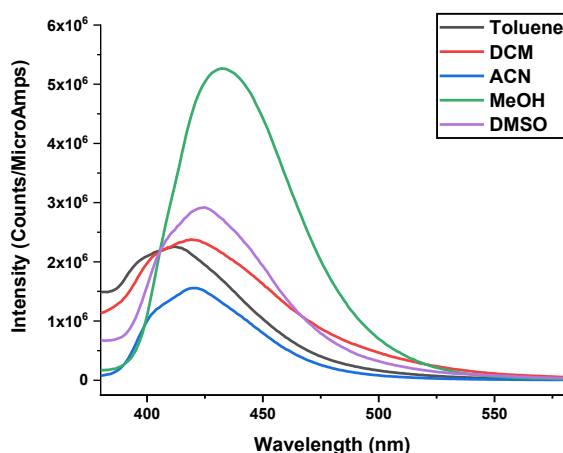

**Fig. S2.** Fluorescence spectra of compound **2j** in different solvents

### **Representative procedure for the synthesis of 1b, 1d-1g**

Mixture of compound **2S** (5 mmol) and 2.5 N HCl (12.5 mmol) was heated to 50 °C. Compound **1S** (5.5 mmol) was added followed by 12N HCl (60 mmol) and heated the mixture at 110 °C for 30 min. After cooling the reaction mixture, 14N NH<sub>4</sub>OH (aq.) was added until the solution became basic. Extracted the organic fraction with EtOAc (100 mL), washed with water (100 mL) and brine (100 mL) respectively. The organic fraction was dried with anhydrous Na<sub>2</sub>SO<sub>4</sub> and then filtered. Removed the solvent in rotavapor under reduced pressure and the crude product was then purified by column chromatography using silica gel 100-200 mesh and hexane/ethyl acetate as eluent.

### **Representative procedure for the synthesis of 1a and 1h**

#### **Step I**

Compound **3S** (5 mmol) was dissolved in 5 mL EtOH and refluxed for 1h. Then solution of compound **4S** (5 mmol) in 10 mL EtOH was slowly added with the help of dropping funnel and the obtained mixture was refluxed for 30 min. After cooling, the reaction mixture was poured into ice cold water. The precipitate was collected and washed with ice cold water (100 mL). Dried crude was used as it is for the next step.

#### **Step II**

A mixture of crude product obtained in step I and 10 mL of 85% phosphoric acid was heated for 6h at 170 °C. After completion of reaction as monitored by TLC, crushed ice was added. Reaction mixture was basified by adding 6M NaOH, extracted with EtOAc (100 mL) washed with water (100 mL) and brine (100 mL) respectively. The organic fraction was dried with anhydrous Na<sub>2</sub>SO<sub>4</sub> and then filtered. Removed the solvent in rotavapor under reduced pressure and the crude product was then purified by column chromatography using silica gel 100-200 mesh and hexane/ethyl acetate as eluent.

### **Representative procedure for the synthesis of 1c**

#### **Step I**

Compound **6S** (10 mmol) was dissolved in anhydrous toluene (20 mL). Anhydrous acetonitrile (20 mmol) was added followed by potassium *tert*-butoxide (40 mmol). Reaction mixture was stirred for 30 h under nitrogen atmosphere. After completion of reaction as monitored by TLC, 2% NaHCO<sub>3</sub> solution (100 mL) was added. Then extracted the organic fraction with EtOAc (100 mL), washed with water (100 mL) and brine (100 mL) respectively. The organic fraction was dried with anhydrous Na<sub>2</sub>SO<sub>4</sub> and then filtered. Dried crude was used as it is for the next step.

#### **Step II**

Crude product obtained in step-I, **7S** and 2.5 N HCl (12.5 mmol) was heated to 50 °C. Compound **1S** (5.5 mmol) was added followed by 12N HCl (60 mmol) and heated the mixture at 110 °C for 30 min. After cooling the reaction mixture, 14N NH<sub>4</sub>OH (aq.) was

added until the solution became basic. Extracted the organic fraction with EtOAc (100 mL), washed with water (100 mL) and brine (100 mL) respectively. The organic fraction was dried with anhydrous  $\text{Na}_2\text{SO}_4$  and then filtered. Removed the solvent in rotavapor and the crude product was then purified by column chromatography using silica gel 100-200 mesh and hexane/ethyl acetate as eluent.

### **Representative procedure for the synthesis of compound 2**

5-Aminopyrazole (0.5 mmol), CuBr (10 mol%), silver carbonate (1 eq.), benzoic acid (1 eq.) and toluene (3 mL) were added sequentially in an oven dried 15 mL pressure tube equipped with magnetic stir bar (10mm x 5mm). The reaction vessel was carefully tightened with 'O' ring and PTFE threaded plug. The reaction mixture was heated at 130°C for 6 h. After cooling the reaction mixture was filtered over celite bed, saturated solution of  $\text{NaHCO}_3$  (20 mL) was added and organic portion extracted with ethyl acetate (2 x 20 mL). Organic layer was separated and washed with water (2 x 50 mL) and brine (50 mL) respectively. The organic fraction was dried with anhydrous  $\text{Na}_2\text{SO}_4$  and then filtered. The Solvent was evaporated under reduced pressure and the residue was then purified by column chromatography using silica gel 100-200 mesh and hexane/ethyl acetate as eluent.

\*Use fume hood and blast shield for all the pressure tube reactions. High pressure is generated in seal tube and therefore, one must not fill more than half of total volume of seal tube.

### **Representative procedure for the synthesis of compound 3**

5-Aminopyrazole (0.5 mmol),  $\text{Cu}(\text{OAc})_2$  or CuBr (10 mol%) and toluene (5 mL) were added sequentially in an oven dried 50 mL round bottom flask. The reaction mixture was refluxed at 120°C for 6 h. After cooling water (50mL) was added and organic portion extracted with ethyl acetate (2 x 50 mL). Organic layer was separated and washed with water (2 x 50 mL) and brine (50 mL) respectively. The organic fraction was dried with anhydrous  $\text{Na}_2\text{SO}_4$  and then filtered. The Solvent was evaporated under reduced pressure and the residue was then purified by column chromatography using silica gel 100-200 mesh and hexane/ethyl acetate as eluent.

### **Representative procedure for the synthesis of compound 4**

5-Aminopyrazole (0.5 mmol), CuX (0.5 mmol),  $\text{FeCl}_3$  (10 mol%) and toluene (5 mL) were added sequentially in an oven dried 50 mL round bottom flask. The reaction mixture was refluxed at 120°C for 6 h. After cooling water (50mL) was added and organic portion extracted with ethyl acetate (2 x 50 mL). Organic layer was separated and washed with water (2 x 50 mL) and brine (50 mL) respectively. The organic fraction was dried with anhydrous  $\text{Na}_2\text{SO}_4$  and then filtered. The Solvent was evaporated under reduced pressure and the residue was then purified by column chromatography using silica gel 100-200 mesh and hexane/ethyl acetate as eluent.

## Characterization of the Products

|                                                                                                      |                                                                                                                                                                                                                                                                                                                                                                                                                                                                                                                                                                                                                                                                                                                         |
|------------------------------------------------------------------------------------------------------|-------------------------------------------------------------------------------------------------------------------------------------------------------------------------------------------------------------------------------------------------------------------------------------------------------------------------------------------------------------------------------------------------------------------------------------------------------------------------------------------------------------------------------------------------------------------------------------------------------------------------------------------------------------------------------------------------------------------------|
| 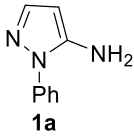 <p><b>1a</b></p>   | <p><b>1-Phenyl-1H-pyrazol-5-amine (1a):</b><sup>1</sup> Brown liquid; <math>R_f = 0.3</math> (hexane/EtOAc, 1:1), Yield 58 %, 465 mg; <math>^1\text{H NMR}</math> (400 MHz, <math>\text{CDCl}_3</math>): <math>\delta</math> 7.55-7.52 (m, 2H), 7.47-7.43 (m, 2H), 7.40-7.39 (m, 1H), 7.35-7.31 (m, 1H), 5.58-5.57 (m, 1H), 3.89 (bs, 2H); <math>^{13}\text{C NMR}</math> (100 MHz, <math>\text{CDCl}_3</math>): <math>\delta</math> 144.8, 140.2, 138.5, 129.3, 127.3, 123.8, 90.5; HRMS (ESI) exact mass calculated for <math>\text{C}_9\text{H}_9\text{N}_3</math> <math>[\text{M} + \text{H}]^+</math> : 160.0875; found: 160.0874.</p>                                                                             |
|  <p><b>1b</b></p>   | <p><b>3-Methyl-1-phenyl-1H-pyrazol-5-amine (1b):</b><sup>2</sup> Yellow solid; M. P. 115-116 °C; <math>R_f = 0.45</math> (hexane/EtOAc, 1:1), Yield 96 %, 830 mg; <math>^1\text{H NMR}</math> (400 MHz, <math>\text{CDCl}_3</math>): <math>\delta</math> 7.55-7.52 (m, 2H), 7.47-7.43 (m, 2H), 7.33-7.29 (m, 1H), 5.44 (s, 1H), 3.79 (bs, 2H), 2.23 (s, 3H); <math>^{13}\text{C NMR}</math> (100 MHz, <math>\text{CDCl}_3</math>): <math>\delta</math> 149.4, 145.2, 138.6, 129.4, 127.0, 123.8, 90.7, 13.9; HRMS (ESI) exact mass calculated for <math>\text{C}_{10}\text{H}_{11}\text{N}_3</math> <math>[\text{M} + \text{H}]^+</math> : 174.1031; found: 174.1028.</p>                                               |
|  <p><b>1c</b></p> | <p><b>1,3-Diphenyl-1H-pyrazol-5-amine (1c):</b><sup>3</sup> Light brown solid; M. P. 129-130 °C; <math>R_f = 0.40</math> (hexane/EtOAc, 1:1), Yield 46 %, 1.08 g; <math>^1\text{H NMR}</math> (400 MHz, <math>\text{CDCl}_3</math>): <math>\delta</math> 7.83-7.81 (m, 2H), 7.63-7.60 (m, 2H), 7.50-7.45 (m, 2H), 7.40-7.35 (m, 3H), 7.32-7.38 (m, 1H), 5.93 (s, 1H), 3.85 (bs, 2H); <math>^{13}\text{C NMR}</math> (100 MHz, <math>\text{CDCl}_3</math>): <math>\delta</math> 151.5, 145.8, 138.6, 133.4, 129.5, 128.5, 127.8, 127.4, 125.6, 124.1, 88.1; HRMS (ESI) exact mass calculated for <math>\text{C}_{15}\text{H}_{13}\text{N}_3</math> <math>[\text{M} + \text{H}]^+</math> : 236.1188; found: 236.1187.</p> |
|  <p><b>1d</b></p> | <p><b>3-Methyl-1-(p-tolyl)-1H-pyrazol-5-amine (1d):</b><sup>2</sup> Yellow solid; M. P. 208-209 °C; <math>R_f = 0.35</math> (hexane/EtOAc, 1:1), Yield 95 %, 900 mg; <math>^1\text{H NMR}</math> (400 MHz, <math>\text{CDCl}_3</math>): <math>\delta</math> 7.39-7.37 (m, 2H), 7.24-7.21 (m, 2H), 5.39 (s, 1H), 3.78 (bs, 2H), 2.37 (s, 3H), 2.21 (s, 3H); <math>^{13}\text{C NMR}</math> (100 MHz, <math>\text{CDCl}_3</math>): <math>\delta</math> 148.9, 145.2, 136.8, 135.9, 129.8, 123.7, 90.2, 20.9, 13.7; HRMS (ESI) exact mass calculated for <math>\text{C}_{11}\text{H}_{13}\text{N}_3</math> <math>[\text{M} + \text{H}]^+</math> : 188.1188; found: 188.1185.</p>                                           |



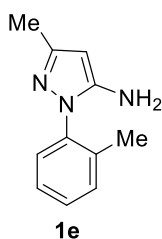

**3-Methyl-1-(*o*-tolyl)-1*H*-pyrazol-5-amine (1e):**<sup>2</sup> Yellow liquid;  $R_f = 0.45$  (hexane/EtOAc, 1:1), Yield 92 %, 860 mg;  $^1\text{H NMR}$  (400 MHz,  $\text{CDCl}_3$ ):  $\delta$  7.34-7.23 (m, 4H), 5.37 (s, 1H), 3.56 (bs, 2H), 2.21 (s, 3H), 2.14 (s, 3H);  $^{13}\text{C NMR}$  (100 MHz,  $\text{CDCl}_3$ ):  $\delta$  148.8, 145.9, 136.7, 136.6, 131.0, 129.0, 128.0, 126.6, 88.7, 17.3, 13.9; HRMS (ESI) exact mass calculated for  $\text{C}_{11}\text{H}_{13}\text{N}_3$   $[\text{M} + \text{H}]^+$  : 188.1188; found: 188.1186.

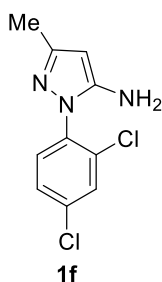

**1-(2,4-Dichlorophenyl)-3-methyl-1*H*-pyrazole (1f):**<sup>2</sup> Yellow solid; M. P. 114-115 °C;  $R_f = 0.40$  (hexane/EtOAc, 1:1), Yield 94 %, 1.14 g;  $^1\text{H NMR}$  (400 MHz,  $\text{CDCl}_3$ ):  $\delta$  7.55-7.54 (m, 1H), 7.42-7.35 (m, 2H), 5.46 (s, 1H), 3.60 (bs, 2H), 2.23 (s, 3H);  $^{13}\text{C NMR}$  (100 MHz,  $\text{CDCl}_3$ ):  $\delta$  150.4, 146.6, 135.4, 134.6, 132.9, 131.0, 130.1, 128.1, 90.3, 13.9; HRMS (ESI) exact mass calculated for  $\text{C}_{10}\text{H}_9\text{Cl}_2\text{N}_3$   $[\text{M} + \text{H}]^+$  : 242.0252; found: 242.0251.

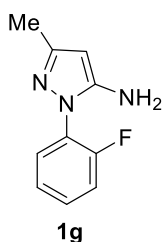

**1-(2-Fluorophenyl)-3-methyl-1*H*-pyrazol-5-amine (1g):**<sup>2</sup> Brown liquid;  $R_f = 0.45$  (hexane/EtOAc, 1:1), Yield 96 %, 920 mg;  $^1\text{H NMR}$  (400 MHz,  $\text{CDCl}_3$ ):  $\delta$  7.53-7.49 (m, 1H), 7.39-7.34 (m, 1H), 7.27-7.19 (m, 2H), 5.46 (s, 1H), 3.73 (bs, 2H), 2.23 (s, 3H);  $^{13}\text{C NMR}$  (100 MHz,  $\text{CDCl}_3$ ):  $\delta$  157.3 (d,  $J_{\text{C-F}} = 250.5$  Hz), 150.4, 146.5, 129.7 (d,  $J_{\text{C-F}} = 7.7$  Hz), 128.9, 126.2 (d,  $J_{\text{C-F}} = 11.6$  Hz), 125.0 (d,  $J_{\text{C-F}} = 3.9$  Hz), 116.5 (d,  $J_{\text{C-F}} = 19.3$  Hz), 90.8, 13.9; HRMS (ESI) exact mass calculated for  $\text{C}_{10}\text{H}_{10}\text{FN}_3$   $[\text{M} + \text{H}]^+$  : 192.0937; found: 192.0933.

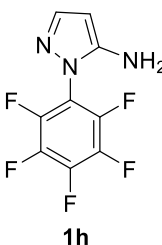

**1-(Perfluorophenyl)-1*H*-pyrazol-5-amine (1h):** Dark brown liquid;  $R_f = 0.35$  (hexane/EtOAc, 1:1), Yield 50 %, 625 mg;  $^1\text{H NMR}$  (400 MHz,  $\text{CDCl}_3$ ):  $\delta$  7.53 (d,  $J = 1.8$  Hz, 1H), 5.69 (d,  $J = 1.8$  Hz, 1H), 3.76 (bs, 2H);  $^{13}\text{C NMR}$  (125 MHz,  $\text{CDCl}_3$ ):  $\delta$  146.9, 145.0 (m), 142.94, 142.9 (m), 140.8 (m), 138.9 (m), 136.9 (m), 113.6 (m), 91.7; HRMS (ESI) exact mass calculated for  $\text{C}_9\text{H}_4\text{F}_5\text{N}_3$   $[\text{M} + \text{H}]^+$  : 250.0404; found: 250.0405.

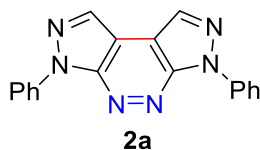

**3,6-Diphenyl-3,6-dihydrodipyrazolo[3,4-c:4',3'-e]pyridazine (2a):** Yellow; M. P. 240-241 °C;  $R_f = 0.65$  (hexane/EtOAc, 9.5:0.5), Yield 78 %, 61 mg; IR (KBr): 2960, 1596, 1527, 1501, 1416, 1186, 1112, 945, 681  $\text{cm}^{-1}$ ;  $^1\text{H NMR}$  (400 MHz,  $\text{CDCl}_3$ ):  $\delta$  8.54 (s, 2H), 8.48-8.45 (m, 4H), 7.63-7.58 (m, 4H), 7.45-7.41 (m, 2H);  $^{13}\text{C NMR}$  (125 MHz,  $\text{CDCl}_3$ ):  $\delta$  149.9, 139.1, 131.3, 129.3, 127.2, 121.9, 109.5; HRMS (ESI) exact mass calculated for  $\text{C}_{18}\text{H}_{12}\text{N}_6$   $[\text{M} + \text{H}]^+$  : 313.1202; found: 313.1200.

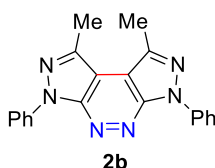

**1,8-Dimethyl-3,6-diphenyl-3,6-dihydrodipyrazolo[3,4-c:4',3'-e]pyridazine (2b):** Yellow solid; M. P. 241-242 °C;  $R_f = 0.68$  (hexane/EtOAc, 9.5:0.5), Yield 71 %, 60 mg; IR (KBr): 1592, 1499, 1426, 1148, 1104, 756, 671  $\text{cm}^{-1}$ ;  $^1\text{H NMR}$  (400 MHz,  $\text{CDCl}_3$ ):  $\delta$  8.44-8.42 (m, 4H), 7.59-7.55 (m, 4H), 7.40-7.35 (m, 2H), 3.00 (s, 3H);  $^{13}\text{C NMR}$  (100 MHz,  $\text{CDCl}_3$ ):  $\delta$  150.5, 140.3, 139.2, 129.2, 126.6, 121.6, 109.7, 15.4; HRMS (ESI) exact mass calculated for  $\text{C}_{20}\text{H}_{16}\text{N}_6$   $[\text{M} + \text{H}]^+$  : 341.1515; found: 341.1513.

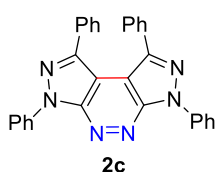

**1,3,6,8-Tetraphenyl-3,6-dihydrodipyrazolo[3,4-c:4',3'-e]pyridazine (2c):** Light yellow solid; M. P. 215-216 °C;  $R_f = 0.78$  (hexane/EtOAc, 9.5:0.5), Yield 64 %, 74 mg; IR (KBr): 3380, 1597, 1499, 1154, 1080, 949  $\text{cm}^{-1}$ ;  $^1\text{H NMR}$  (500 MHz,  $\text{CDCl}_3$ ):  $\delta$  8.53-8.50 (m, 4H), 7.63-7.60 (m, 4H), 7.45-7.42 (m, 2H), 7.39-7.37 (m, 4H), 7.23-7.20 (m, 2H), 7.05-7.02 (m, 4H);  $^{13}\text{C NMR}$  (125 MHz,  $\text{CDCl}_3$ ):  $\delta$  151.1, 144.7, 139.1, 132.3, 129.3, 128.6, 128.5, 127.8, 127.2, 122.3, 108.2; HRMS (ESI) exact mass calculated for  $\text{C}_{30}\text{H}_{20}\text{N}_6$   $[\text{M} + \text{H}]^+$  : 465.1828; found: 465.1824.

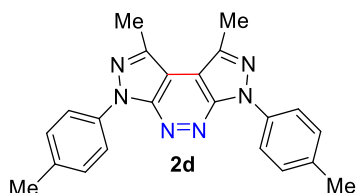

**1,8-Dimethyl-3,6-di-p-tolyl-3,6-dihydrodipyrazolo[3,4-c:4',3'-e]pyridazine (2d):** Yellow solid; M. P. 271-272 °C  $R_f = 0.60$  (hexane/EtOAc, 9.5:0.5), Yield 81 %, 75 mg; IR (KBr): 2916, 1509, 1432, 1151, 917, 814  $\text{cm}^{-1}$ ;  $^1\text{H NMR}$  (500 MHz,  $\text{CDCl}_3$ ):  $\delta$  8.28-8.26 (m, 4H), 7.37-7.35 (m, 2H), 2.98 (s, 6H), 2.44 (s, 6H);  $^{13}\text{C NMR}$  (125 MHz,  $\text{CDCl}_3$ ):  $\delta$  150.4, 139.9, 136.8, 136.4, 129.8, 121.5, 109.4, 21.1, 15.4; HRMS (ESI) exact mass calculated for  $\text{C}_{22}\text{H}_{20}\text{N}_6$   $[\text{M} + \text{H}]^+$  : 369.1828; found: 369.1833.

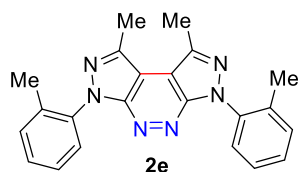

**1,8-Dimethyl-3,6-di-*o*-tolyl-3,6-dihydrodipyrazolo[3,4-*c*:4',3'-*e*]pyridazine (2e):** Light yellow solid; M. P. 220-221 °C;  $R_f = 0.68$  (hexane/EtOAc, 9.5:0.5), Yield 80 %, 74 mg; IR (KBr): 2920, 1537, 1501, 1450, 1311, 1221, 1086, 842, 750, 710  $\text{cm}^{-1}$ ;  $^1\text{H}$  NMR (400 MHz,  $\text{CDCl}_3$ ):  $\delta$  7.50-7.36 (m, 8H), 2.74 (s, 6H), 2.28 (s, 6H);  $^{13}\text{C}$  NMR (100 MHz,  $\text{CDCl}_3$ ):  $\delta$  143.2, 142.6, 137.2, 135.5, 133.2, 131.3, 128.7, 127.7, 126.7, 18.7, 11.7; HRMS (ESI) exact mass calculated for  $\text{C}_{22}\text{H}_{20}\text{N}_6$   $[\text{M} + \text{H}]^+$  : 369.1828; found: 369.1826.

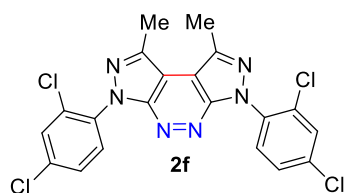

**3,6-Bis(2,4-dichlorophenyl)-1,8-dimethyl-3,6-dihydrodipyrazolo[3,4-*c*:4',3'-*e*]pyridazine (2f):** Light yellow solid; M. P. 198-199 °C;  $R_f = 0.68$  (hexane/EtOAc, 9.5:0.5), Yield 68 %, 81 mg; IR (KBr): 2926, 1543, 1495, 1439, 1381, 1194, 1101, 1012, 924, 821  $\text{cm}^{-1}$ ;  $^1\text{H}$  NMR (400 MHz,  $\text{CDCl}_3$ ):  $\delta$  7.66 (d,  $J = 1.8$  Hz, 2H), 7.60 (s, 1H), 7.58 (s, 1H), 7.47 (d,  $J = 2.5$  Hz, 1H), 7.45 (d,  $J = 2.5$  Hz, 1H), 3.01 (s, 6H);  $^{13}\text{C}$  NMR (100 MHz,  $\text{CDCl}_3$ ):  $\delta$  151.4, 141.5, 135.8, 134.3, 133.0, 130.6, 130.5, 127.9, 108.7, 15.4; HRMS (ESI) exact mass calculated for  $\text{C}_{20}\text{H}_{12}\text{Cl}_4\text{N}_6$   $[\text{M} + \text{H}]^+$  : 476.9956; found: 476.9954.

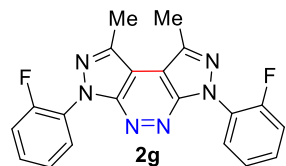

**3,6-Bis(2-fluorophenyl)-1,8-dimethyl-3,6-dihydrodipyrazolo[3,4-*c*:4',3'-*e*]pyridazine (2g):** Light yellow solid; M. P. 229-230 °C;  $R_f = 0.64$  (hexane/EtOAc, 9.5:0.5), Yield 56 %, 53 mg; IR (KBr): 2923, 1515, 1463, 1312, 1252, 1140, 751  $\text{cm}^{-1}$ ;  $^1\text{H}$  NMR (400 MHz,  $\text{CDCl}_3$ ):  $\delta$  7.76-7.72 (m, 2H), 7.51-7.45 (m, 2H), 7.39-7.33 (m, 4H), 2.77 (s, 6H);  $^{13}\text{C}$  NMR (100 MHz,  $\text{CDCl}_3$ ):  $\delta$  156.7 (d,  $J_{\text{C-F}} = 254.3$  Hz), 143.9, 143.4, 133.6, 129.6 (d,  $J_{\text{C-F}} = 7.7$  Hz), 128.0, 126.1 (d,  $J_{\text{C-F}} = 11.6$  Hz), 124.7 (d,  $J_{\text{C-F}} = 3.9$  Hz), 117.1 (d,  $J_{\text{C-F}} = 19.3$  Hz), 11.7; HRMS (ESI) exact mass calculated for  $\text{C}_{20}\text{H}_{14}\text{F}_2\text{N}_6$   $[\text{M} + \text{H}]^+$  : 377.1326; found: 377.1325.

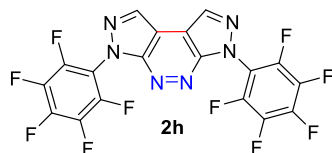

**3,6-Bis(perfluorophenyl)-3,6-dihydrodipyrazolo[3,4-*c*:4',3'-*e*]pyridazine (2h):** Brown liquid;  $R_f = 0.68$  (hexane/EtOAc, 9.5:0.5), Yield 55 %, 68 mg; IR (KBr): 2963, 1535, 1519, 1403, 1328, 1261, 1213, 1191, 1100, 998, 884, 810, 760, 703, 687  $\text{cm}^{-1}$ ;  $^1\text{H}$  NMR (400 MHz,  $\text{CDCl}_3$ ):  $\delta$  8.74 (s, 2H);  $^{13}\text{C}$  NMR (125 MHz,  $\text{CDCl}_3$ ):  $\delta$  151.2, 145.3-145.1 (m), 143.7-143.0 (m), 141.9-141.5 (m), 139.2-139.0 (m), 137.3-137.0 (m), 134.5, 113.2-112.9 (m), 109.2;  $^{19}\text{F}$  NMR (470.6 MHz,  $\text{CDCl}_3$ )  $\delta$  -143.9 (dd, 2F, ortho), -150.1 (t, 1F, para), -160.2 (dt, 2F, meta); HRMS (ESI) exact mass calculated for  $\text{C}_{18}\text{H}_2\text{F}_{10}\text{N}_6$   $[\text{M} + \text{H}]^+$  : 493.0260; found: 493.0257.

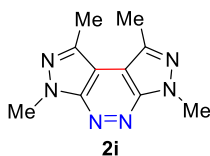

**1,3,6,8-Tetramethyl-3,6-dihydrodipyrazolo[3,4-c:4',3'-e]pyridazine (2i):** Light yellow solid; M. P. 104-105 °C;  $R_f = 0.65$  (hexane/EtOAc, 9.5:0.5), Yield 84 %, 45 mg; IR (KBr): 2919, 1532, 1494, 1446, 1379, 1213, 1281, 1089, 772, 656  $\text{cm}^{-1}$ ;  $^1\text{H}$  NMR (400 MHz,  $\text{CDCl}_3$ ):  $\delta$  4.41 (s, 6H), 2.85 (s, 6H);  $^{13}\text{C}$  NMR (100 MHz,  $\text{CDCl}_3$ ):  $\delta$  150.6, 138.0, 107.5, 35.1, 14.9; HRMS (ESI) exact mass calculated for  $\text{C}_{10}\text{H}_{12}\text{N}_6$   $[\text{M} + \text{H}]^+$  : 217.1202; found: 217.1200.

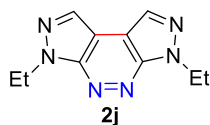

**3,6-Diethyl-3,6-dihydrodipyrazolo[3,4-c:4',3'-e]pyridazine (2j):** Light yellow solid; M. P. 105-106 °C  $R_f = 0.65$  (hexane/EtOAc, 9.5:0.5), Yield 86 %, 46 mg; IR (KBr): 2983, 1524, 1459, 1266, 1205, 1086, 855, 664  $\text{cm}^{-1}$ ;  $^1\text{H}$  NMR (400 MHz,  $\text{CDCl}_3$ ):  $\delta$  8.26 (s, 2H), 4.95 (q,  $J = 7.3$  Hz, 4H), 1.68 (t,  $J = 7.3$  Hz, 6H);  $^{13}\text{C}$  NMR (100 MHz,  $\text{CDCl}_3$ ):  $\delta$  149.3, 129.2, 107.8, 44.0, 15.2; HRMS (ESI) exact mass calculated for  $\text{C}_{10}\text{H}_{12}\text{N}_6$   $[\text{M} + \text{H}]^+$  : 217.1202; found: 217.1201.

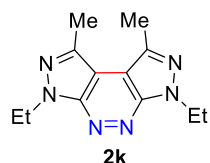

**3,6-Diethyl-1,8-dimethyl-3,6-dihydrodipyrazolo[3,4-c:4',3'-e]pyridazine (2k):** Brown solid; M. P. 95-97 °C  $R_f = 0.55$  (hexane/EtOAc, 9:1), Yield 83 %, 42 mg; IR (KBr): 2922, 1735, 1534, 1481, 1445, 1379, 1208, 1007  $\text{cm}^{-1}$ ;  $^1\text{H}$  NMR (400 MHz,  $\text{CDCl}_3$ ):  $\delta$  4.86 (q,  $J = 7.2$  Hz, 4H), 2.86 (s, 6H), 1.62 (t,  $J = 7.2$  Hz, 6H);  $^{13}\text{C}$  NMR (100 MHz,  $\text{CDCl}_3$ ):  $\delta$  150.0, 137.9, 107.6, 43.5, 15.3, 15.0; HRMS (ESI) exact mass calculated for  $\text{C}_{12}\text{H}_{16}\text{N}_6$   $[\text{M} + \text{H}]^+$  : 245.1515; found: 245.1514.

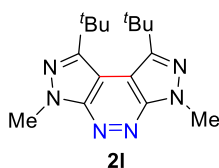

**1,8-Di-tert-butyl-3,6-dimethyl-3,6-dihydrodipyrazolo[3,4-c:4',3'-e]pyridazine (2l):** Light yellow solid; M. P. 156-158 °C  $R_f = 0.75$  (hexane/EtOAc, 9.5:0.5), Yield 85 %, 53 mg; IR (KBr): 2921, 1721, 1543, 1434, 1400, 1268, 1158, 966  $\text{cm}^{-1}$ ;  $^1\text{H}$  NMR (400 MHz,  $\text{CDCl}_3$ ):  $\delta$  4.15 (s, 6H), 1.62 (s, 18 H);  $^{13}\text{C}$  NMR (100 MHz,  $\text{CDCl}_3$ ):  $\delta$  150.6, 142.7, 131.0, 33.9, 33.8, 29.3; HRMS (ESI) exact mass calculated for  $\text{C}_{16}\text{H}_{24}\text{N}_6$   $[\text{M} + \text{H}]^+$  : 301.2141; found: 301.2138.

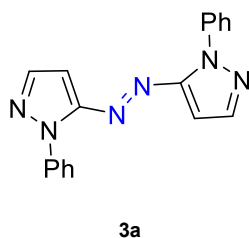

**(E)-1,2-Bis(1-phenyl-1H-pyrazol-5-yl)diazene (3a):** Yellow solid; M. P. 115-116 °C;  $R_f = 0.75$  (hexane/EtOAc, 9.5:0.5), Yield 66 %, 52 mg; IR (KBr): 3409, 1596, 1499, 1395, 1320, 1214, 1131, 1071, 761, 676  $\text{cm}^{-1}$ ;  $^1\text{H}$  NMR (400 MHz,  $\text{CDCl}_3$ ):  $\delta$  7.74-7.72 (m, 6H), 7.54-7.50 (m, 4H), 7.45-7.41 (m, 2H), 6.63 (d,  $J = 1.8$  Hz, 2H);  $^{13}\text{C}$  NMR (100 MHz,  $\text{CDCl}_3$ ):  $\delta$  153.7, 140.6, 138.9, 128.8, 127.9, 125.0, 95.3; HRMS (ESI) exact mass calculated for  $\text{C}_{18}\text{H}_{14}\text{N}_6$   $[\text{M} + \text{H}]^+$  : 315.1358; found: 315.1355.

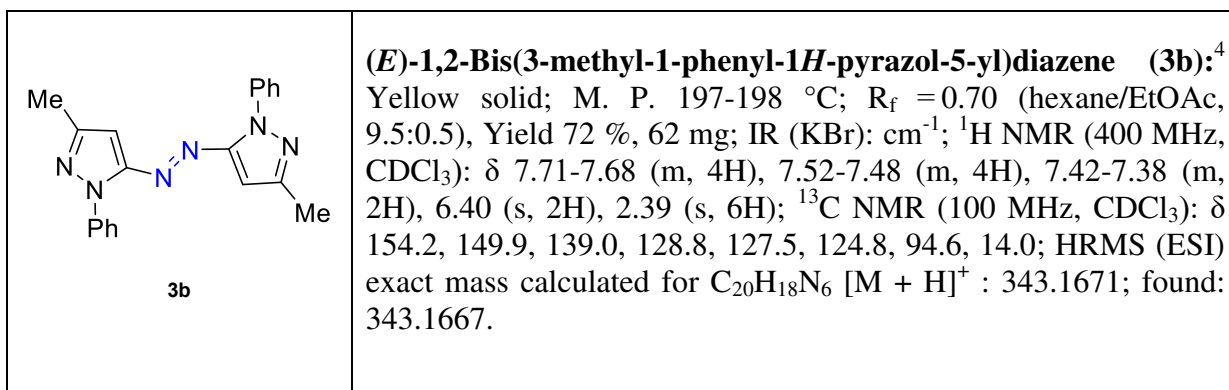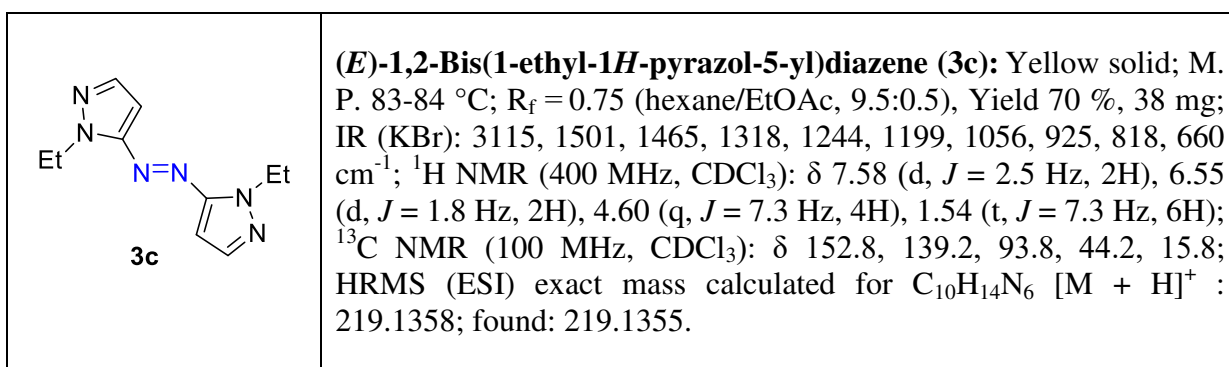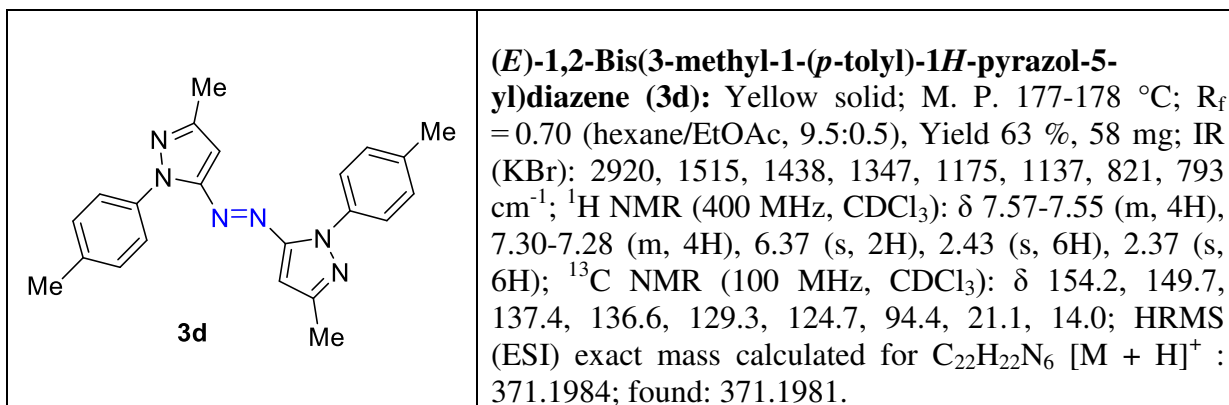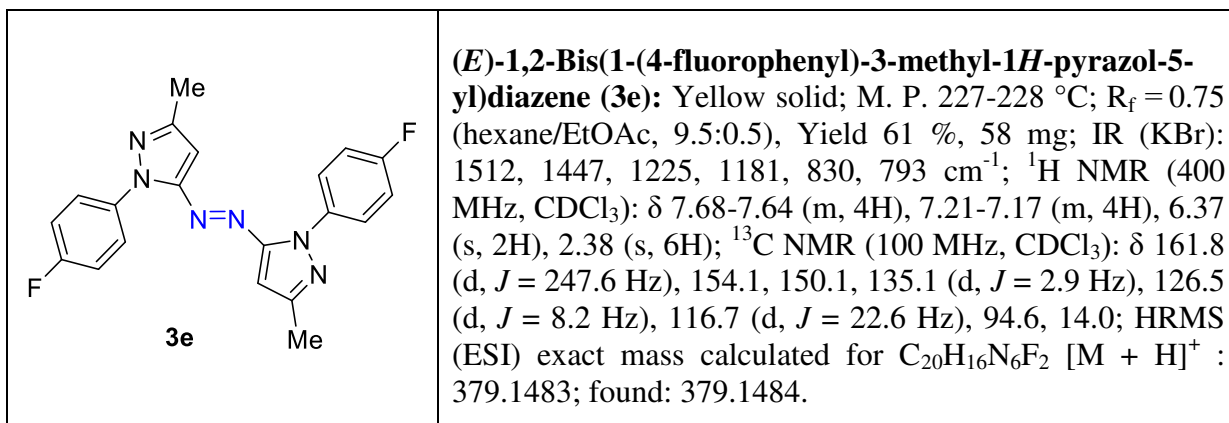

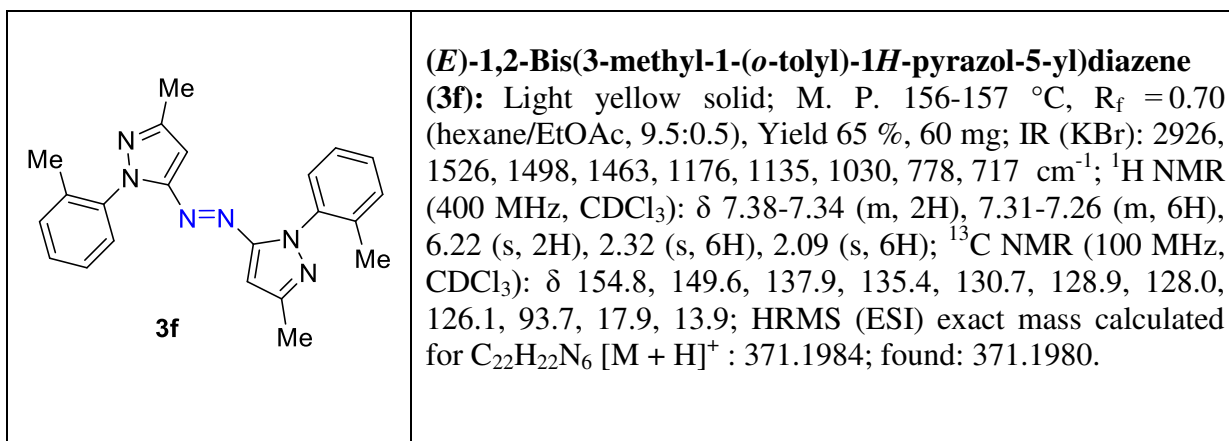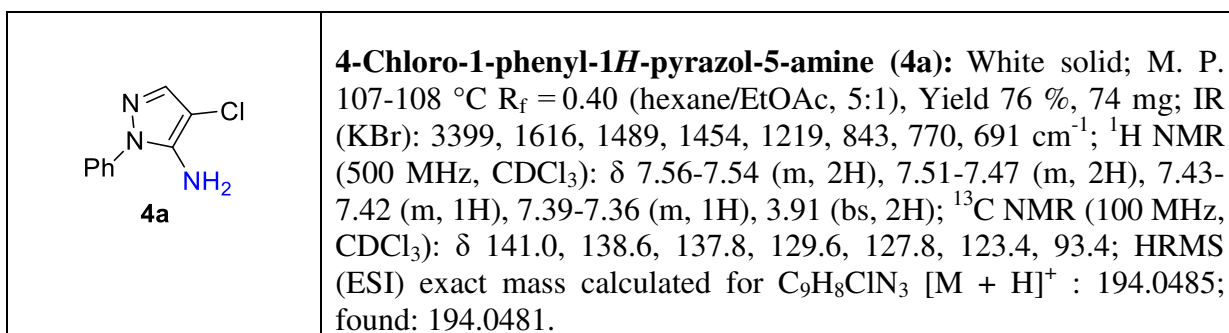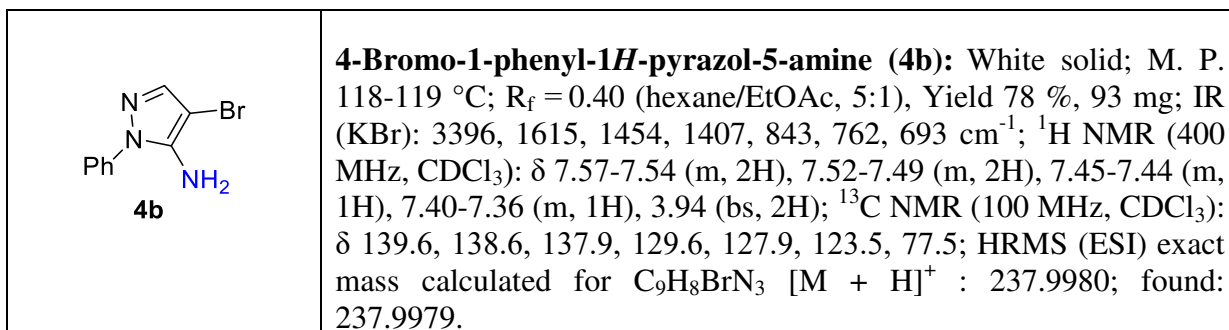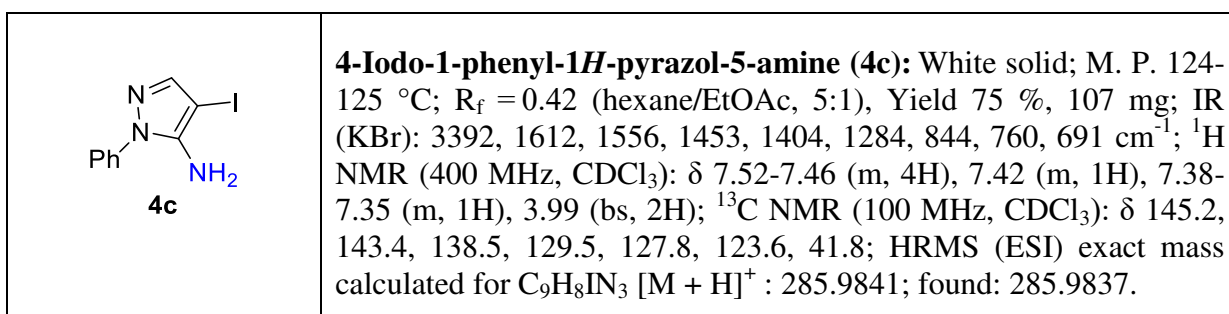

## References

1. T. B. Silva, A. M. R. Bernardino, M. de L. G. Ferreira, K. R. Rogerio, L. J. M. Carvalho, N. Boechat and L. C. S. Pinheiro, *Bioorganic & Medicinal Chemistry*, 2016, **24**, 4492 - 4498.
2. Y. Li, X. Huang, J. He, S. Peng, J. Wang, M. Lang, *Adv. Synth. Catal.*, 2023, **365**, 490 - 495.
3. M-F Zou, J. Cao, A. L. Rodriguez, P. J. Conn and A. H. Newman, *Bioorganic & Medicinal Chemistry Letters*, 2011, **21**, 2650 - 2654.
4. I. Rahman, B. Deka, R. Thakuria, M. L. Deb and P. K. Baruah, *Org. Biomol. Chem.*, 2020, **18**, 6514 - 6518.

### <sup>1</sup>H NMR 1a

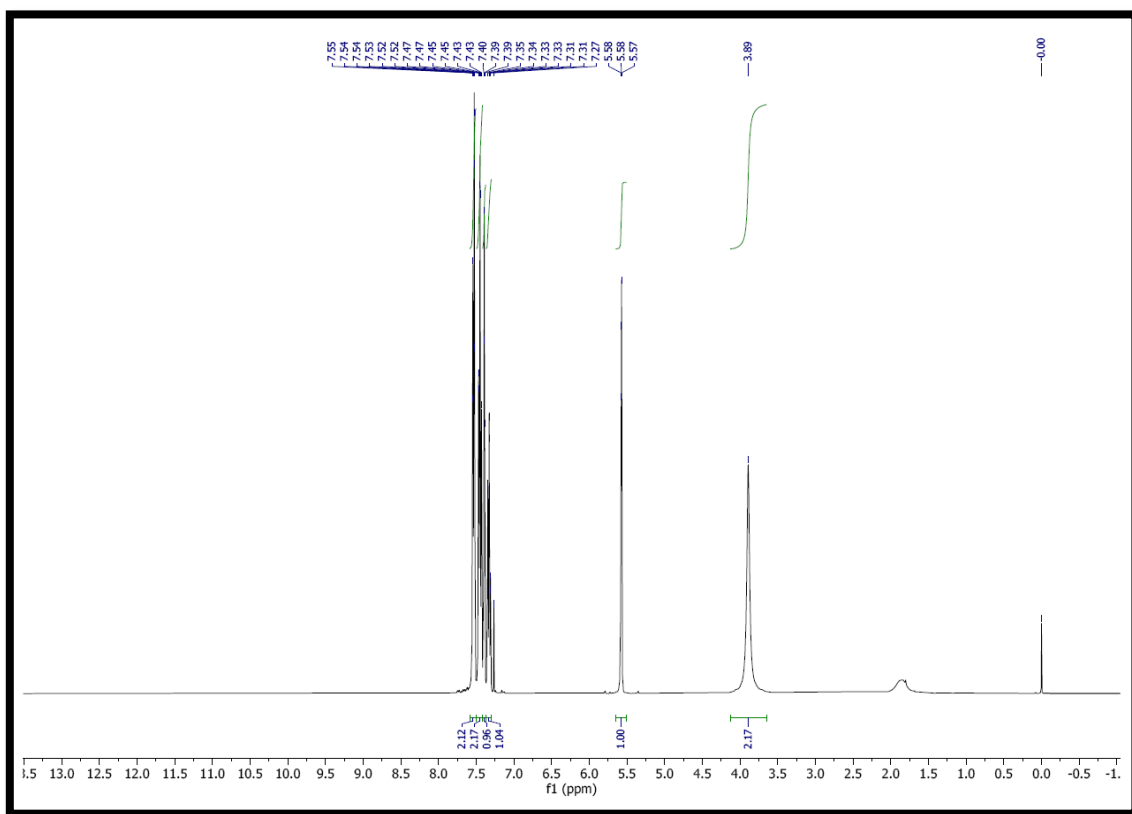

### <sup>13</sup>C NMR 1a

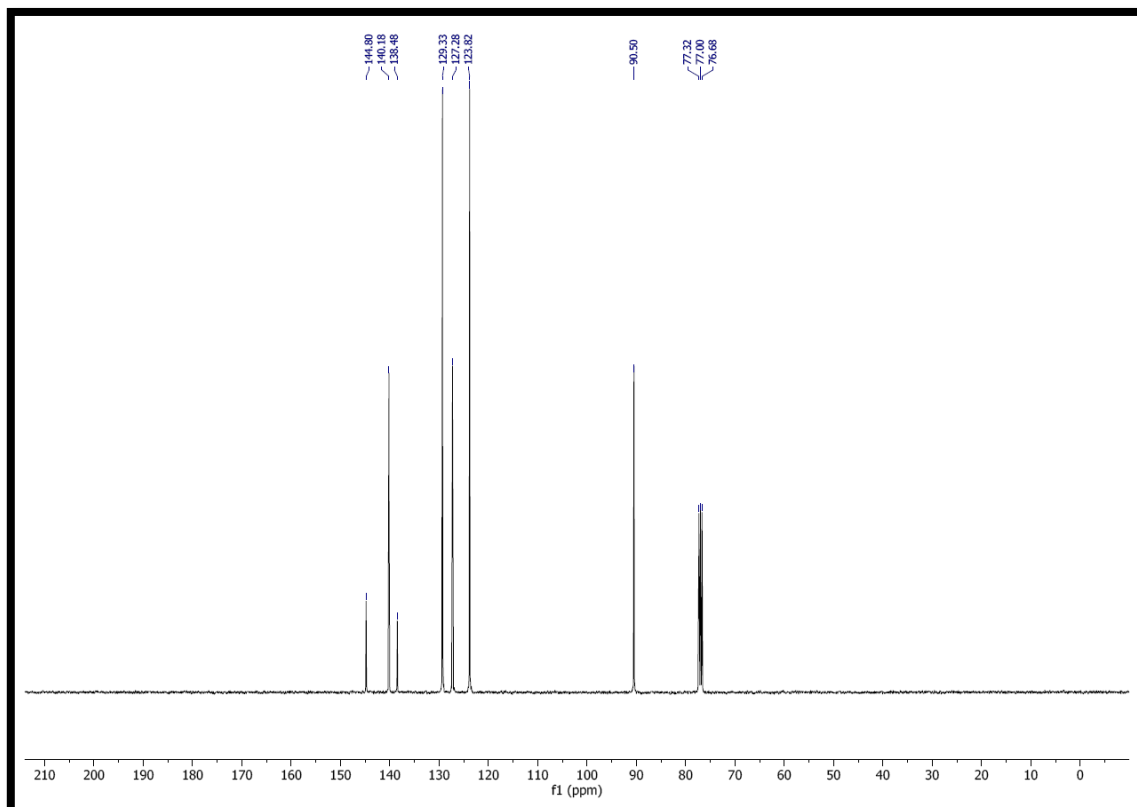



### <sup>1</sup>H NMR 1b

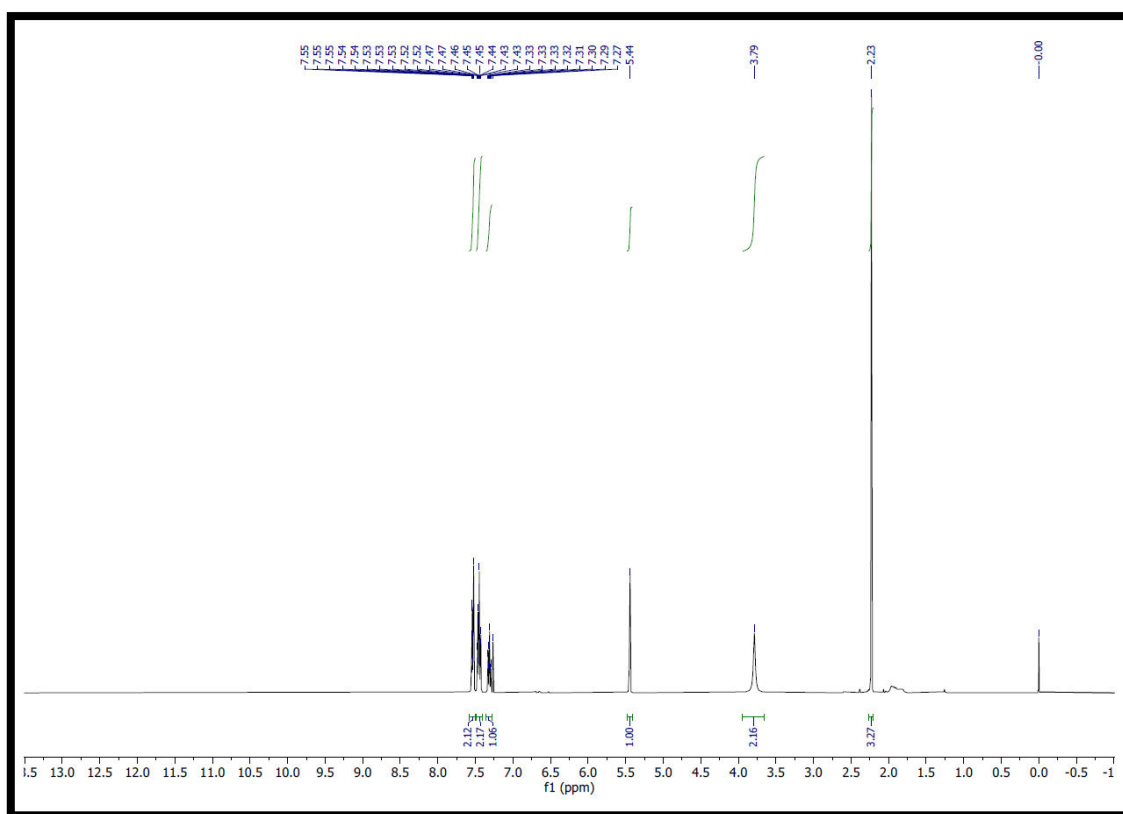

### <sup>13</sup>C NMR 1b

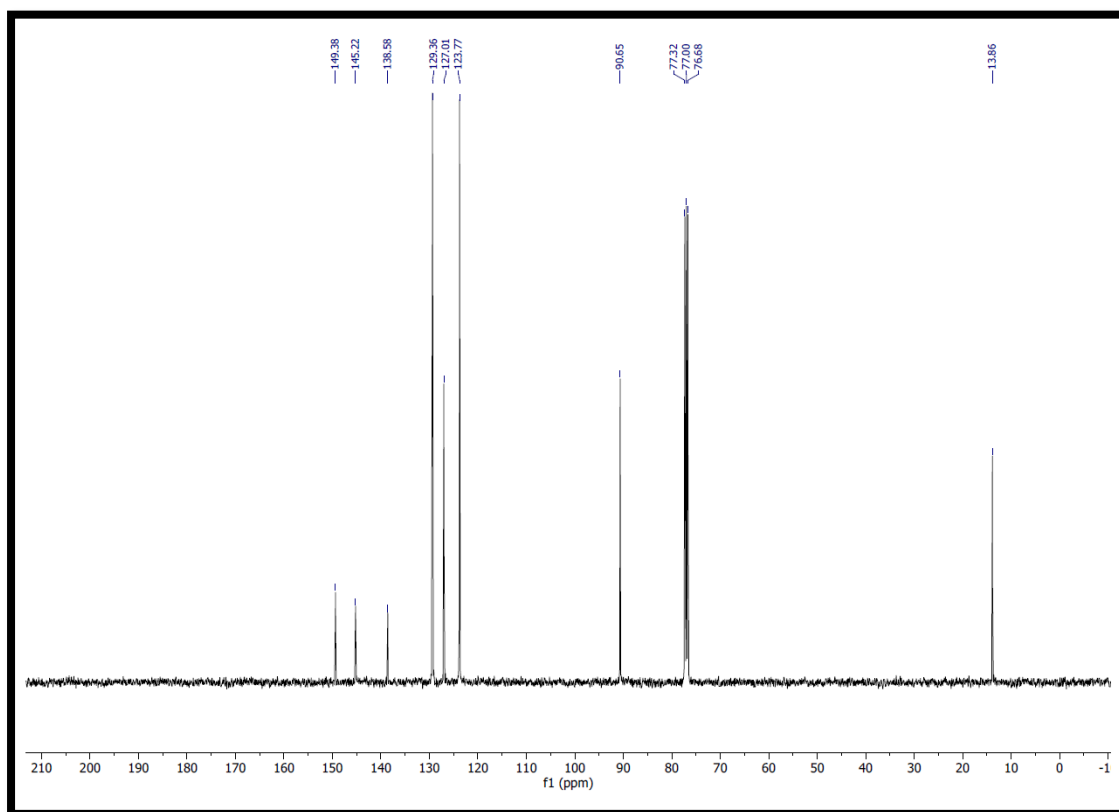

### <sup>1</sup>H NMR 1c

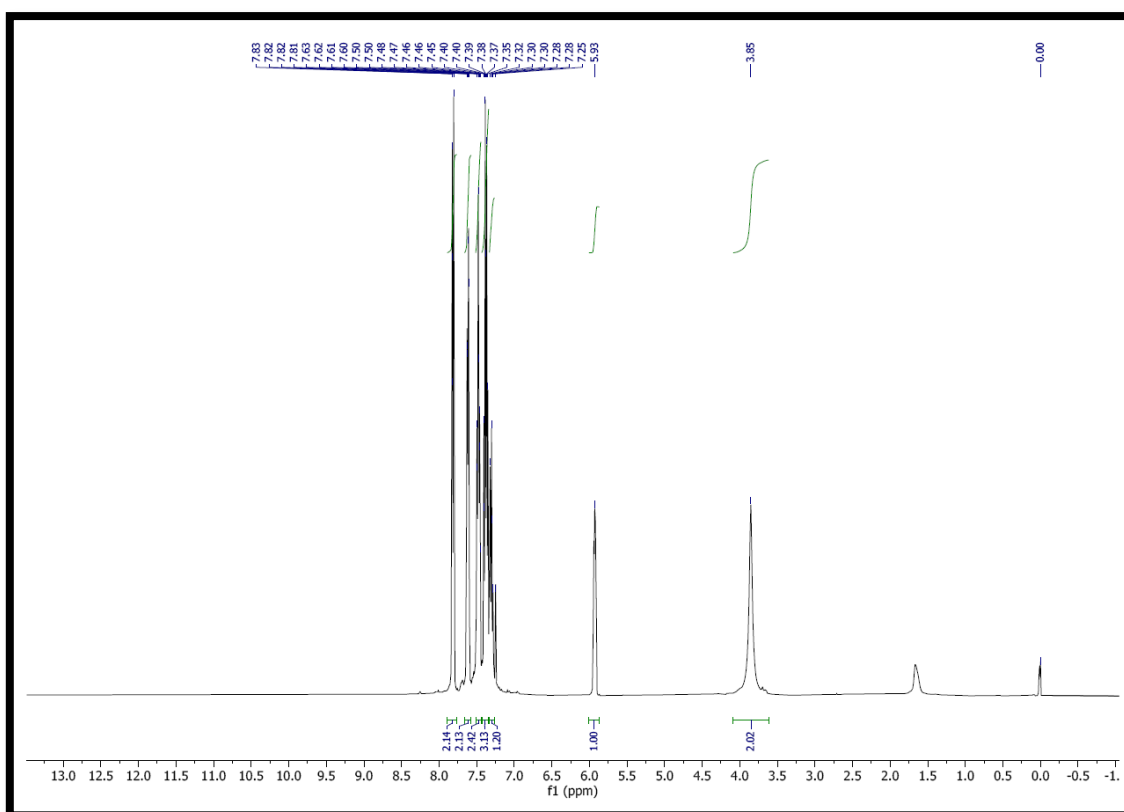

### <sup>13</sup>C NMR 1c

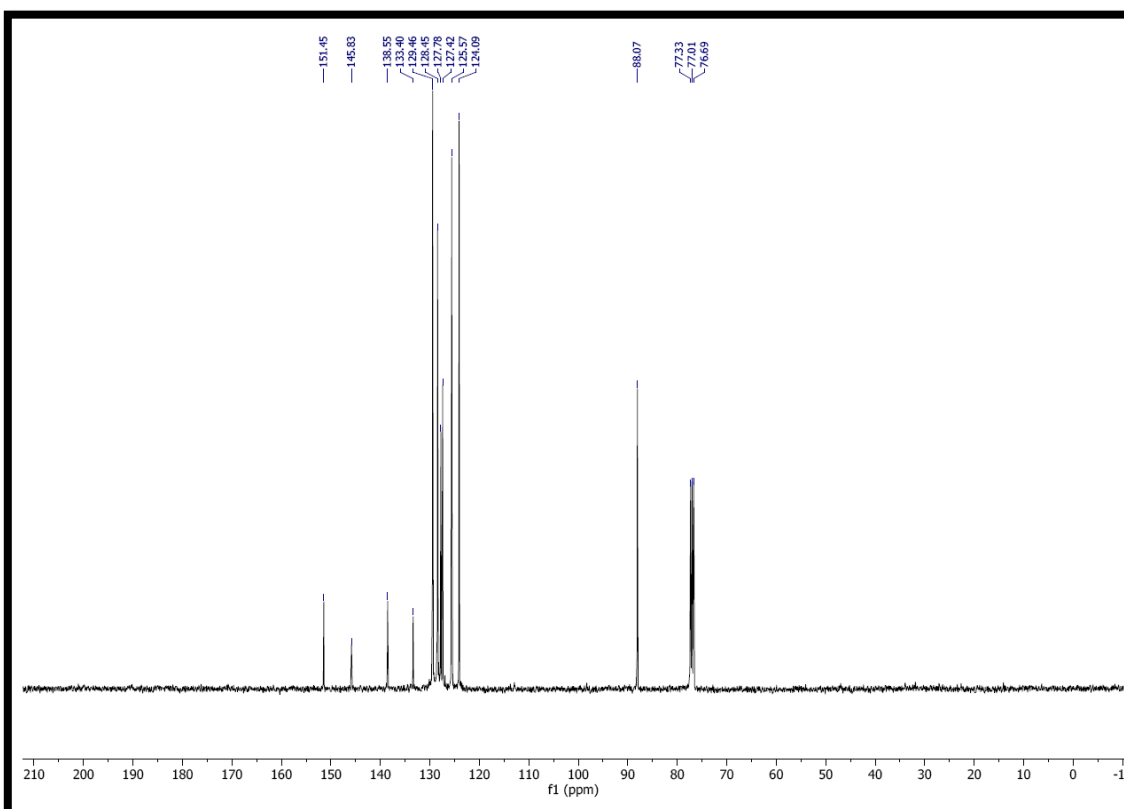

### <sup>1</sup>H NMR 1d

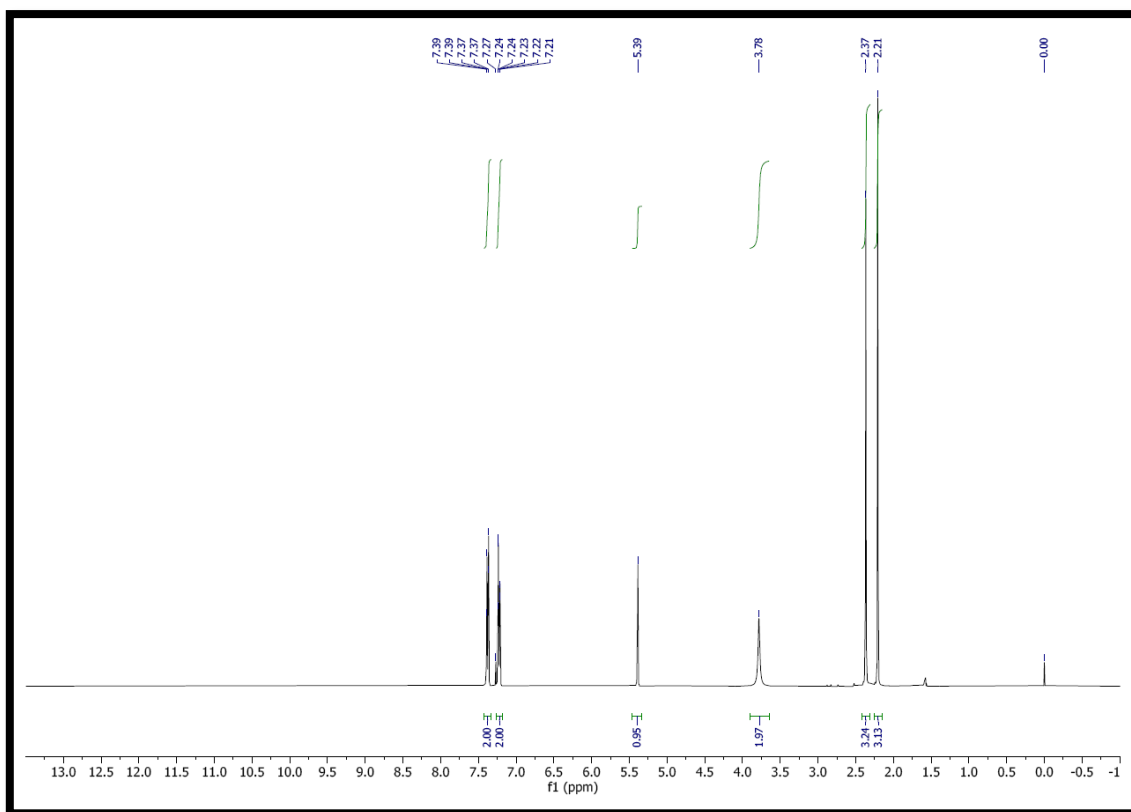

### <sup>13</sup>C NMR 1d

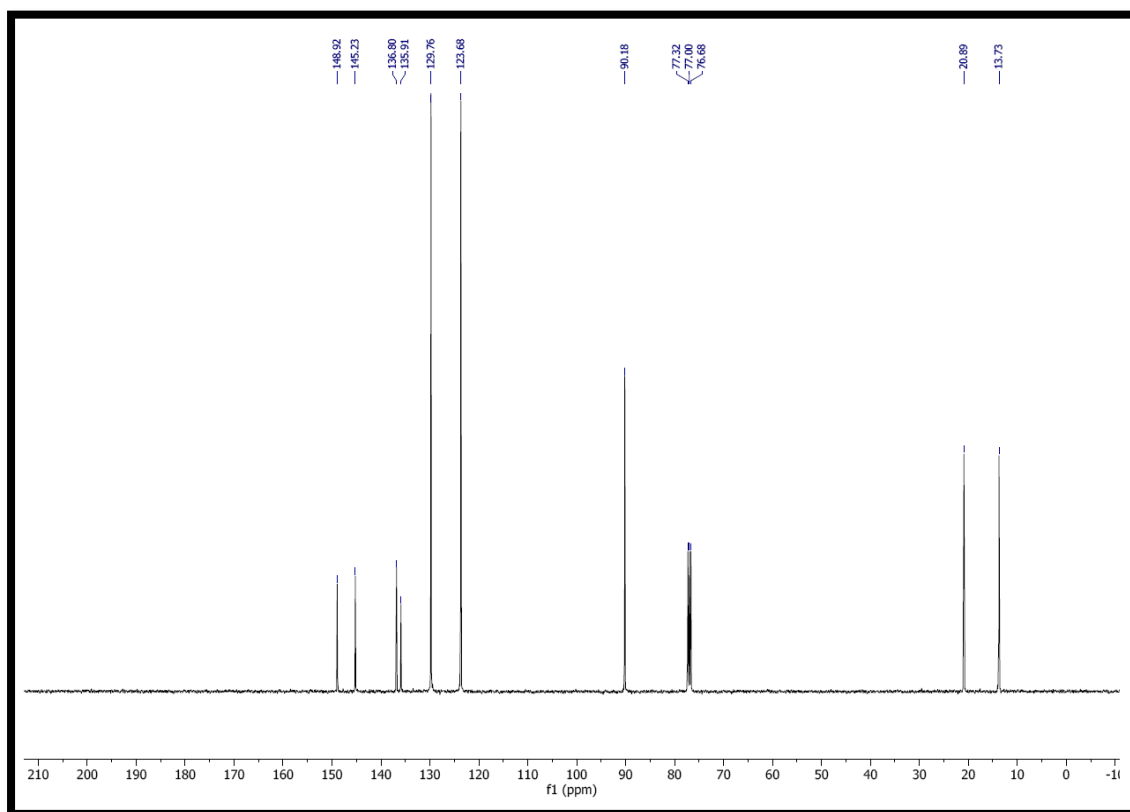

### <sup>1</sup>H NMR 1e

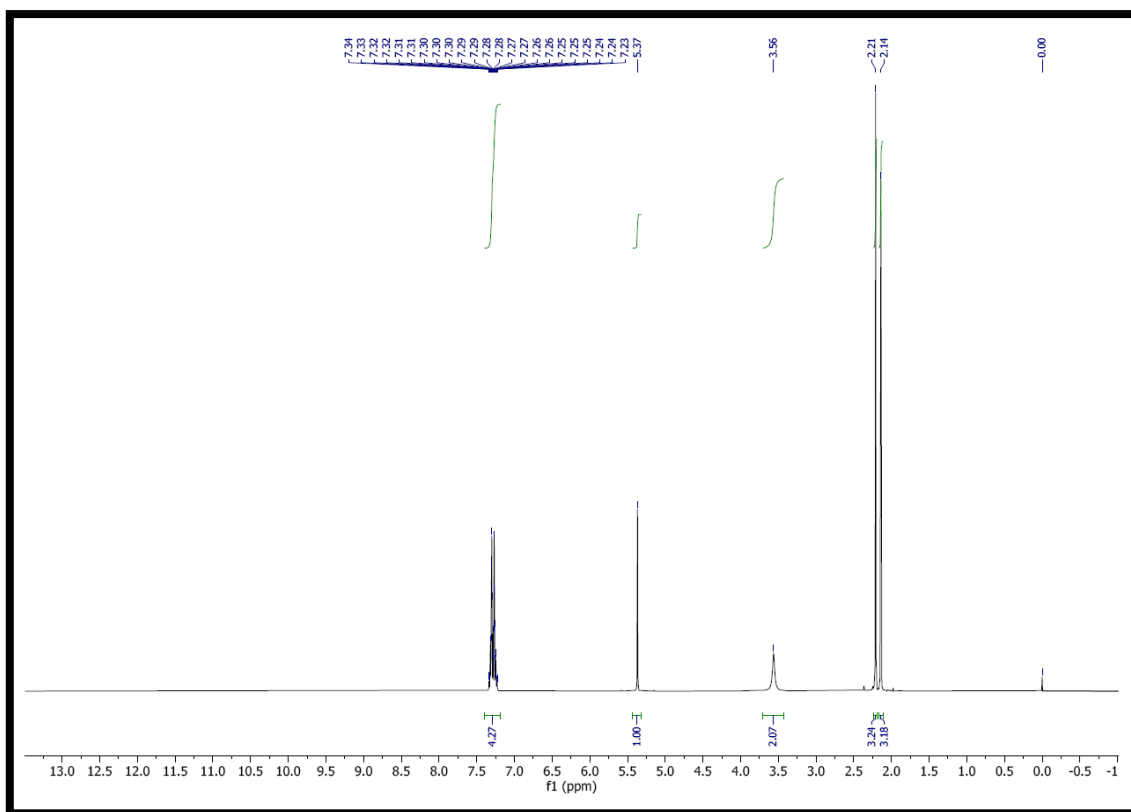

### <sup>13</sup>C NMR 1e

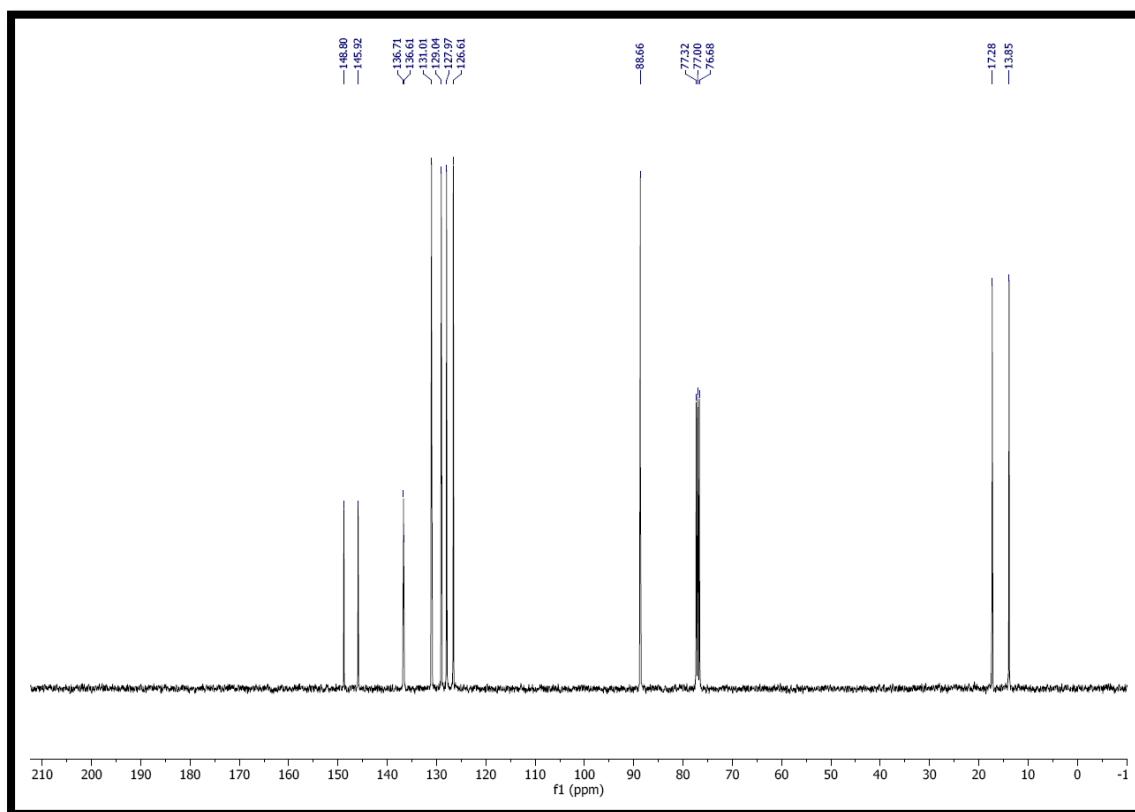

### <sup>1</sup>H NMR 1f

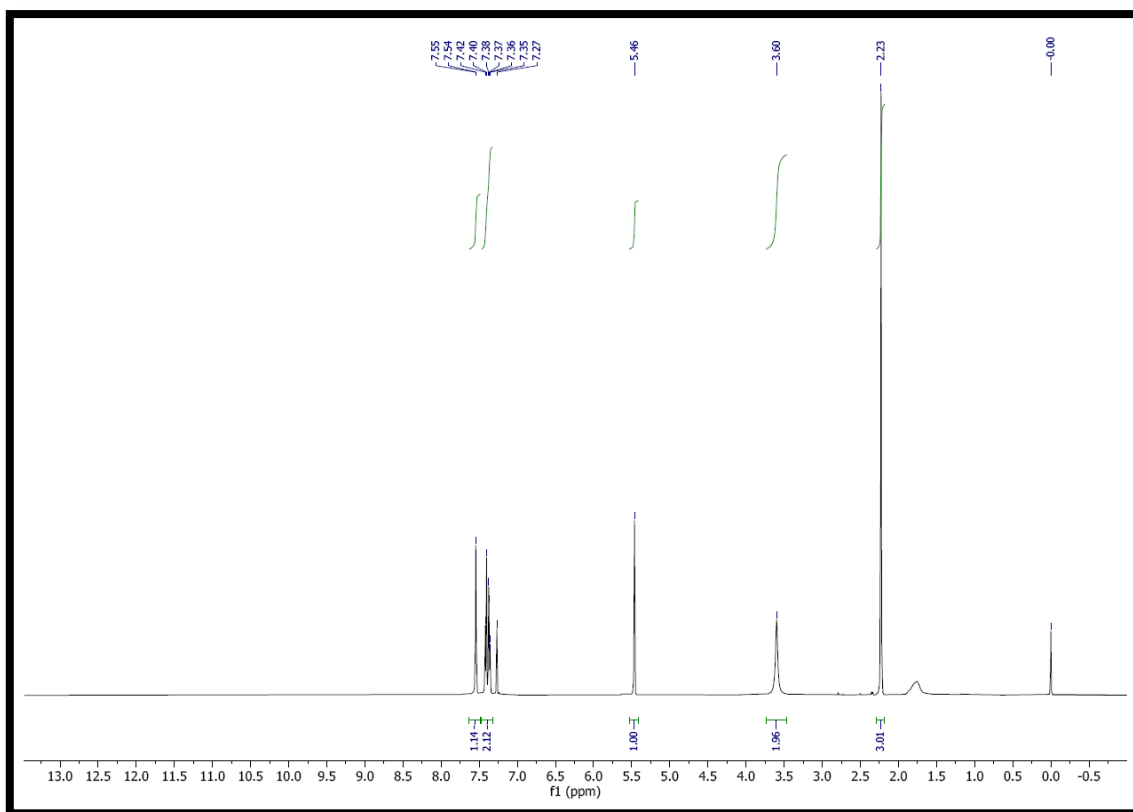

### <sup>13</sup>C NMR 1f

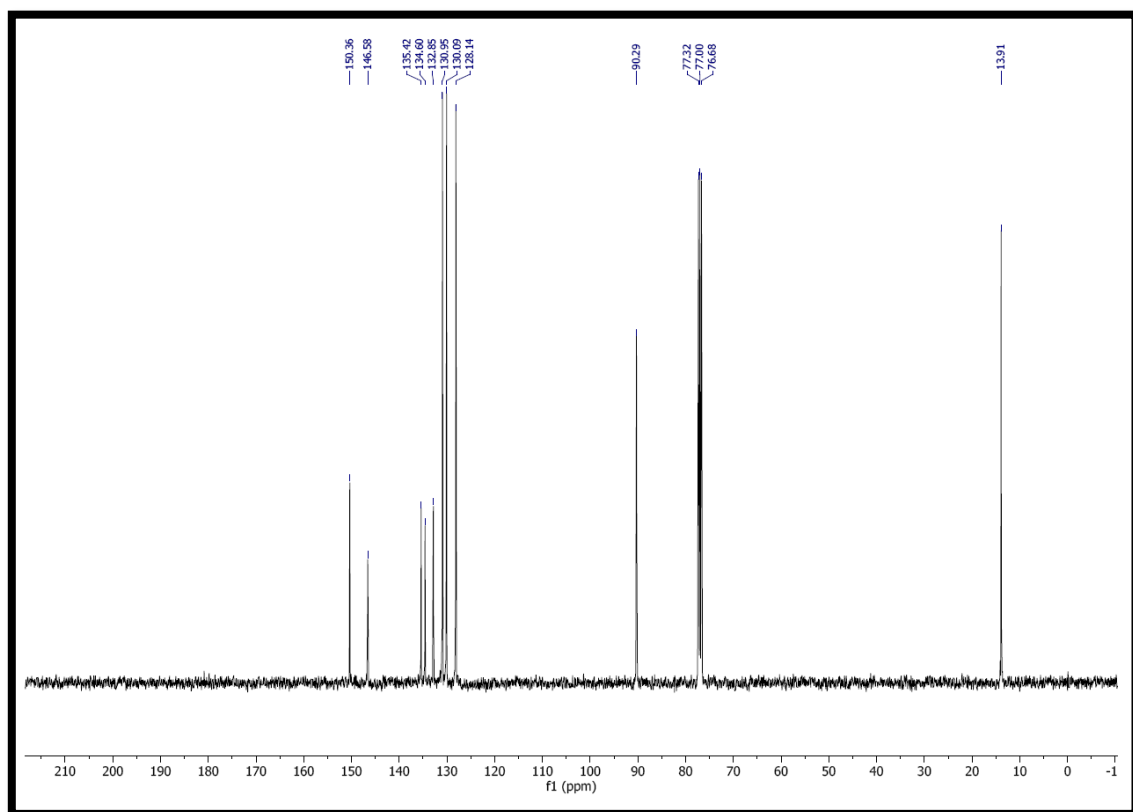

### <sup>1</sup>H NMR 1g

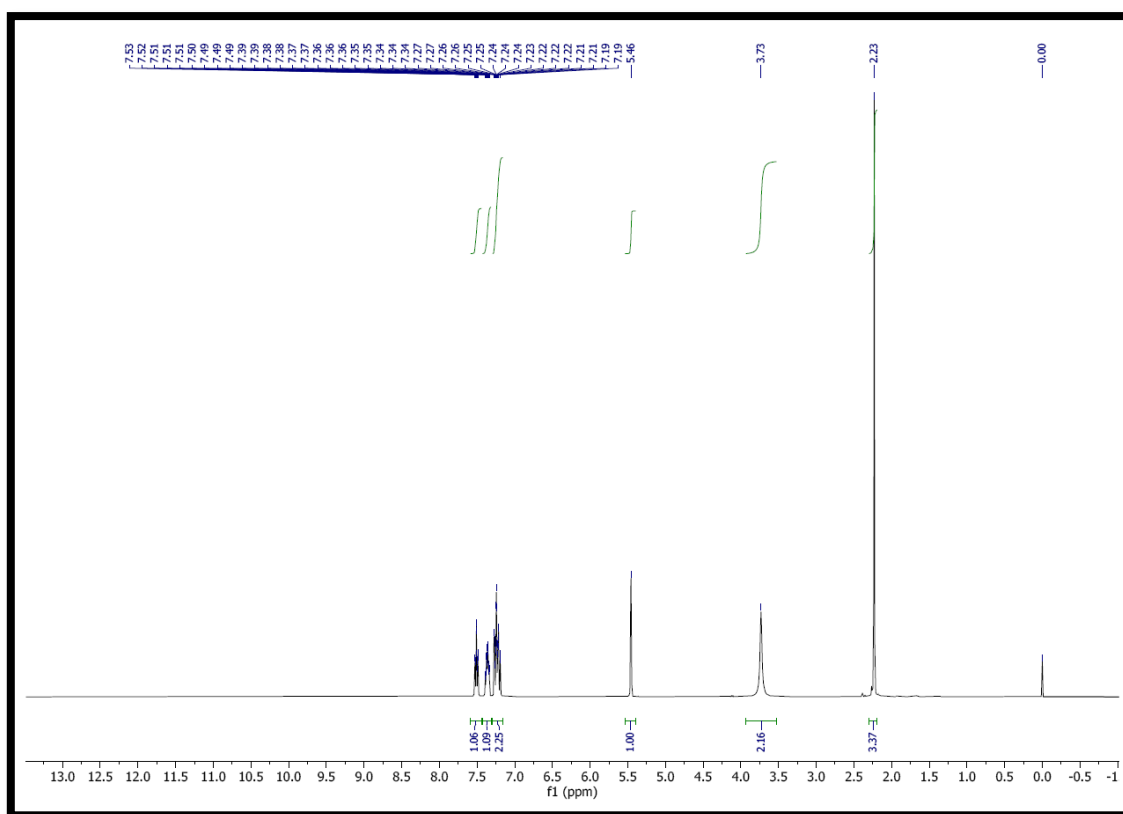

### <sup>13</sup>C NMR 1g

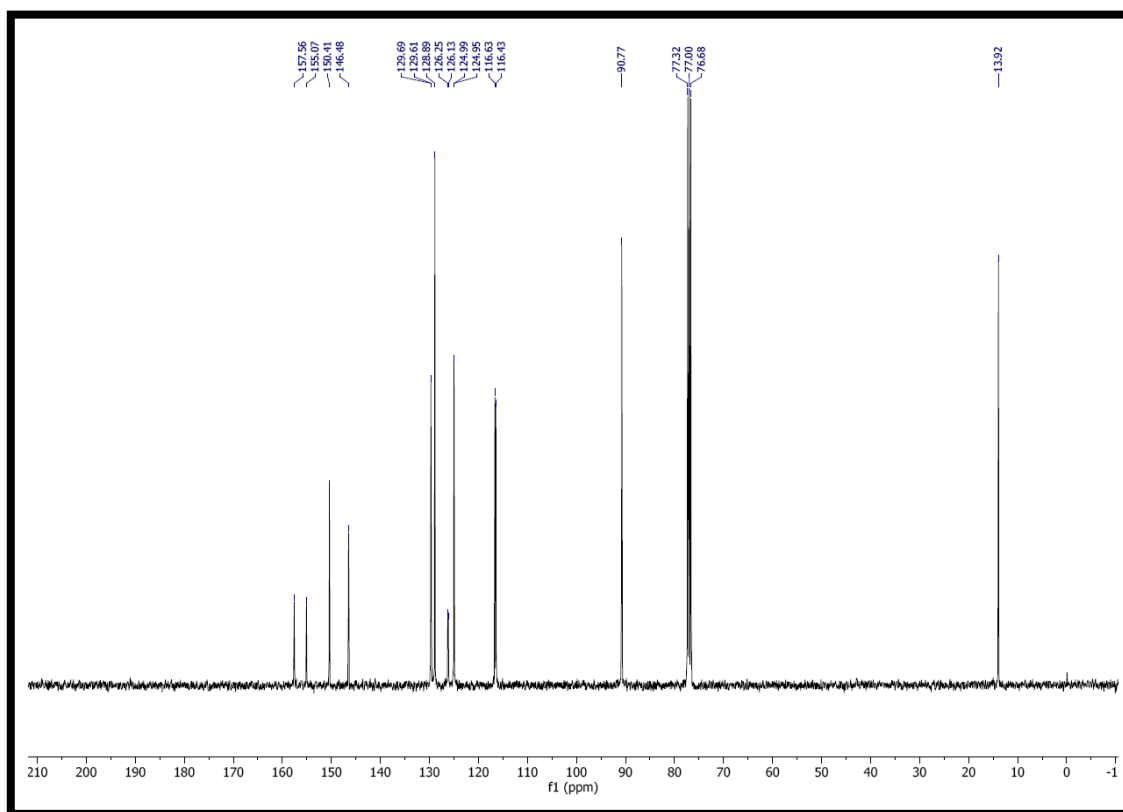

### <sup>1</sup>H NMR 1h

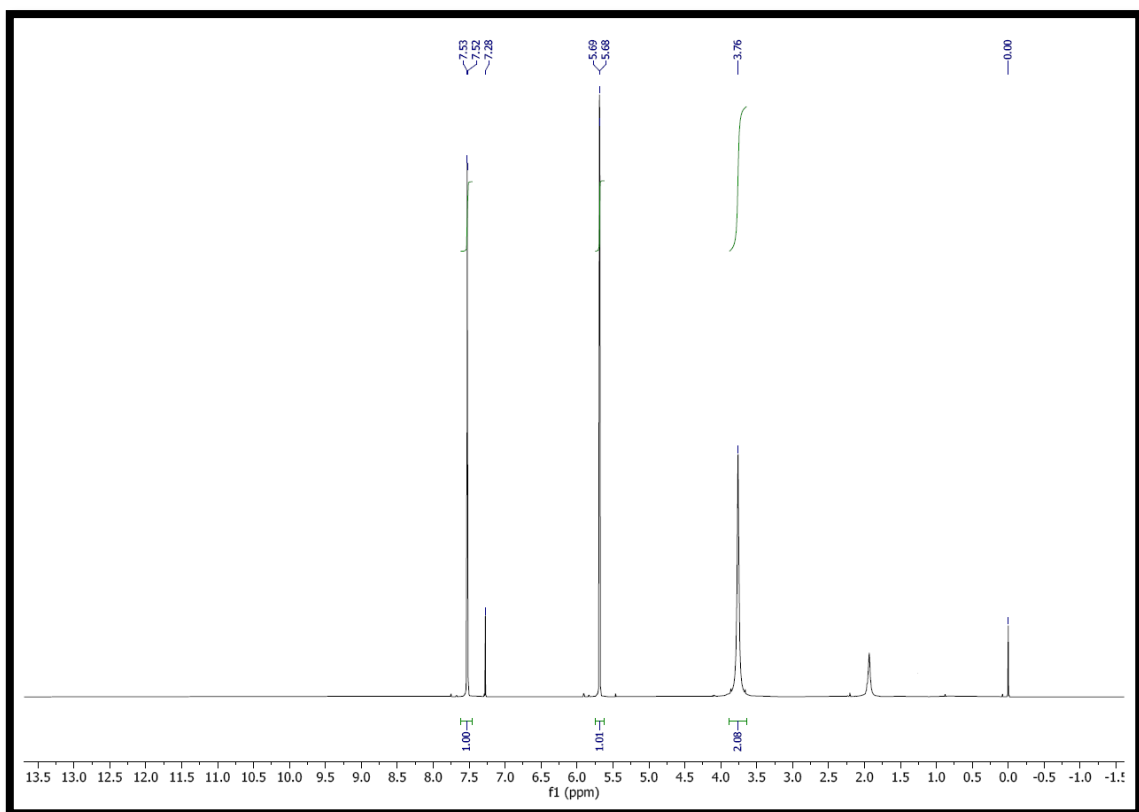

### <sup>13</sup>C NMR 1h

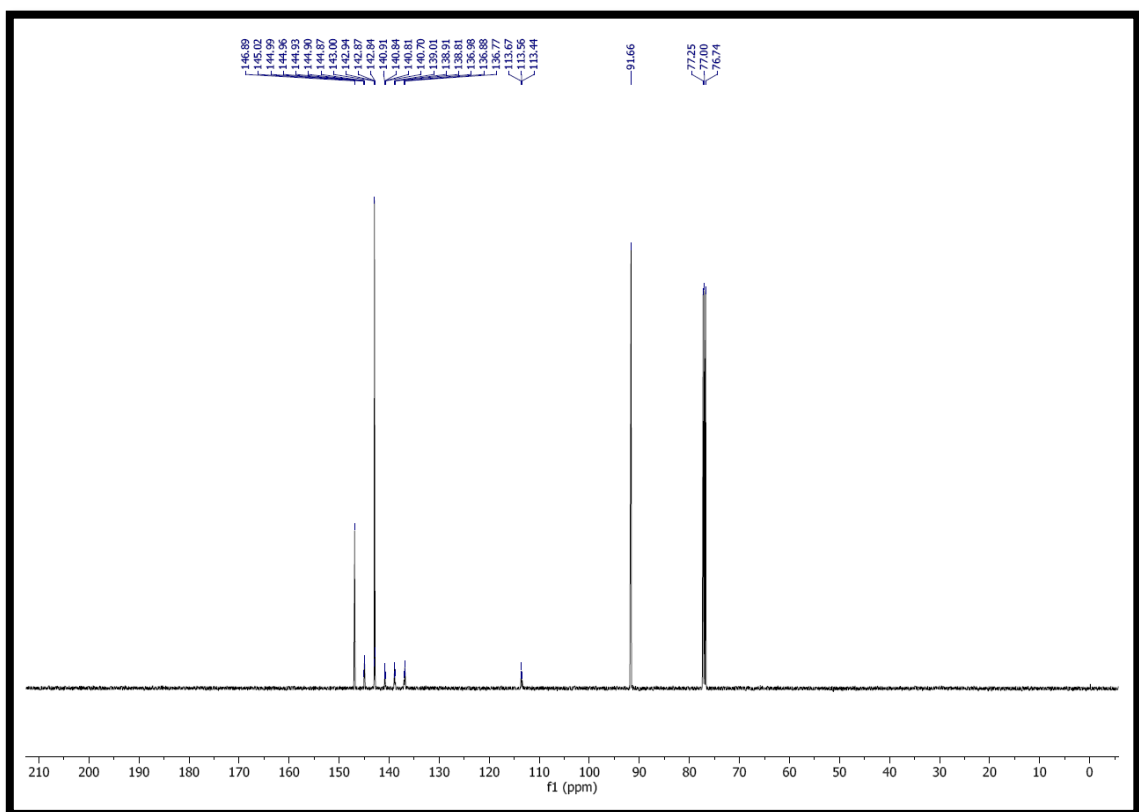

### <sup>1</sup>H NMR 2a

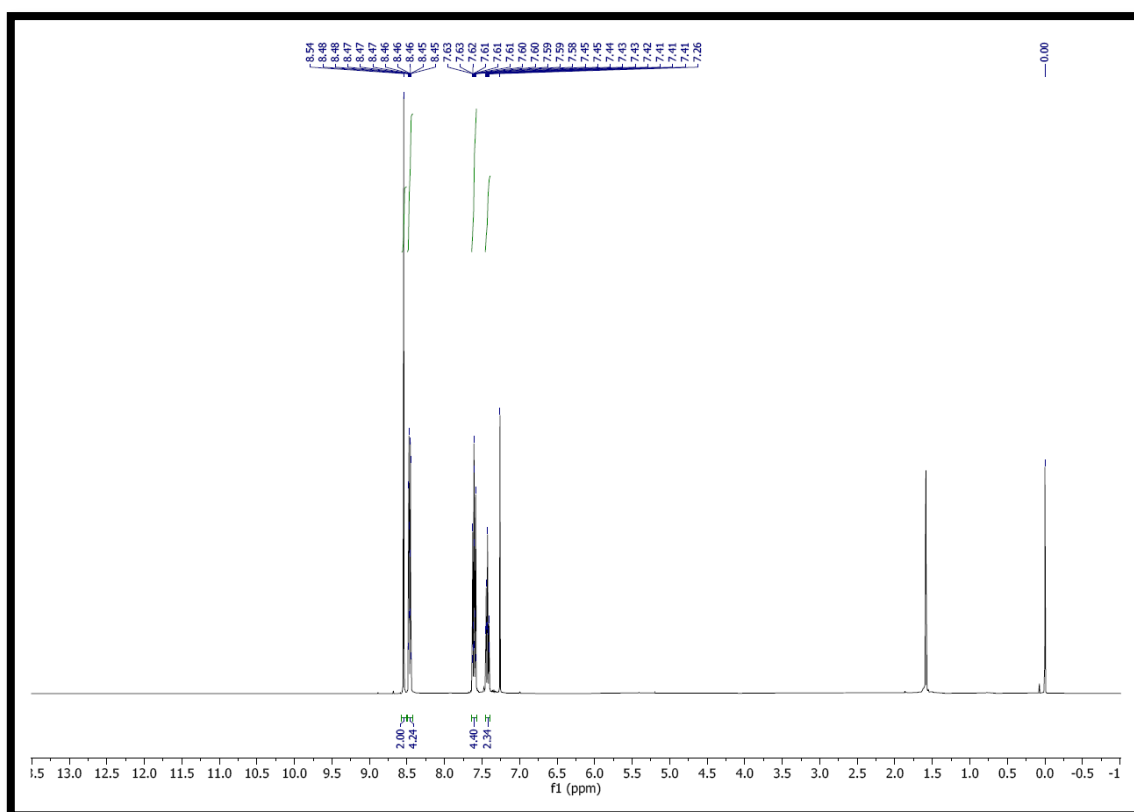

### <sup>13</sup>C NMR 2a

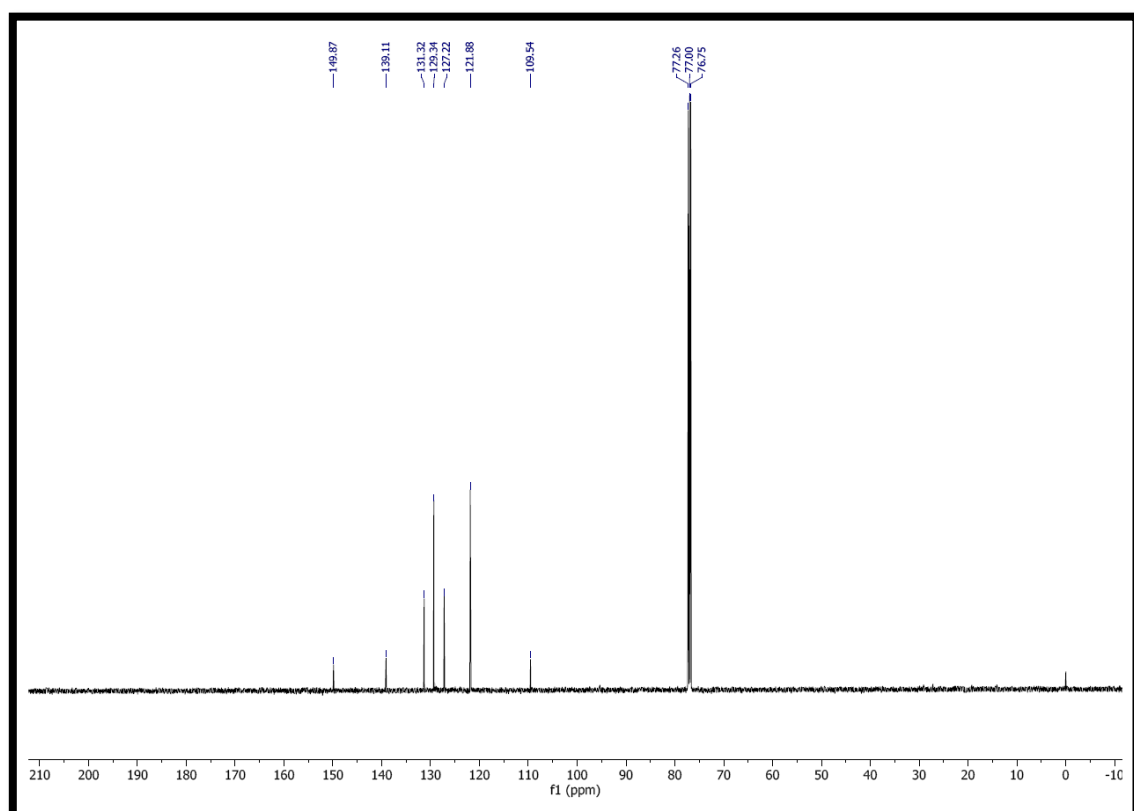



### <sup>1</sup>H NMR 2b

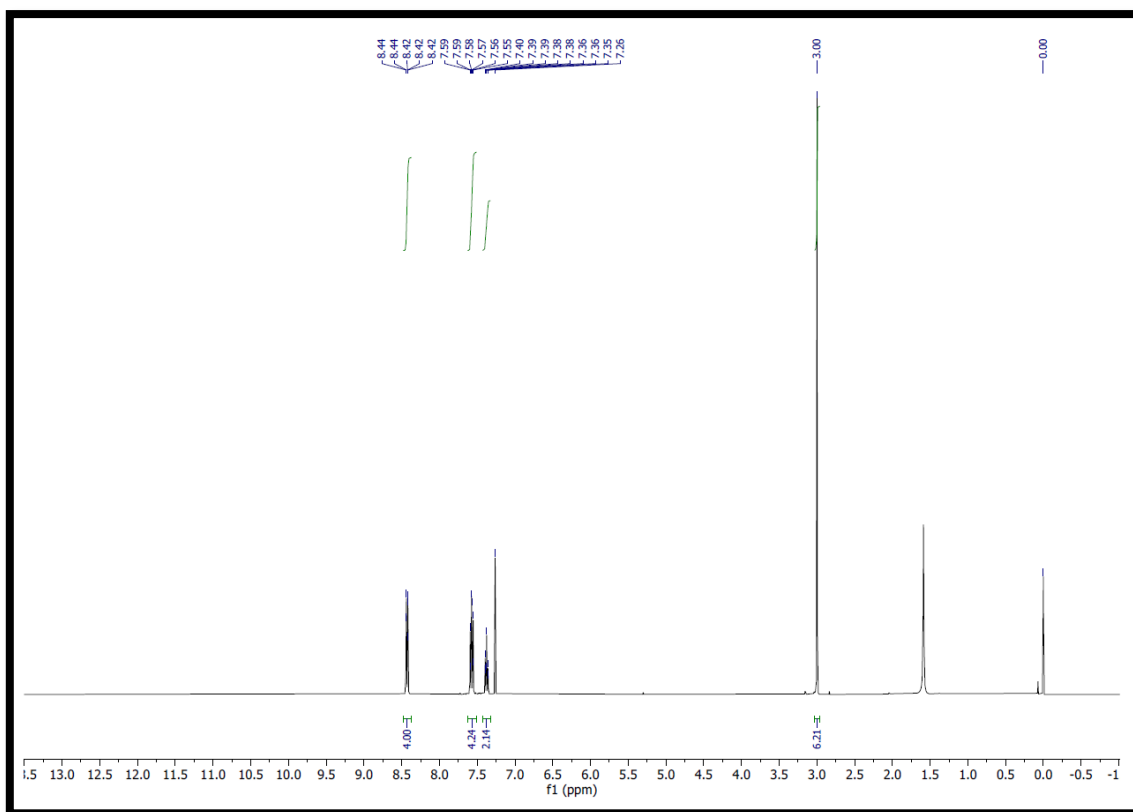

### <sup>13</sup>C NMR 2b

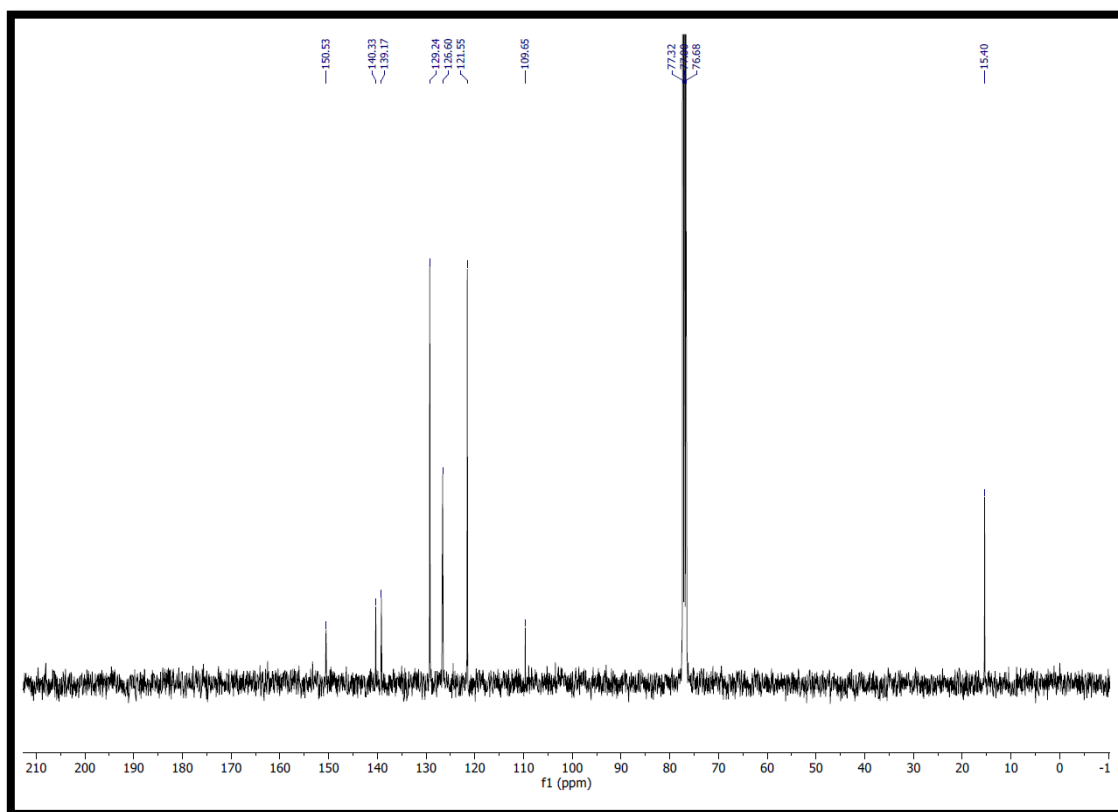

### <sup>1</sup>H NMR 2c

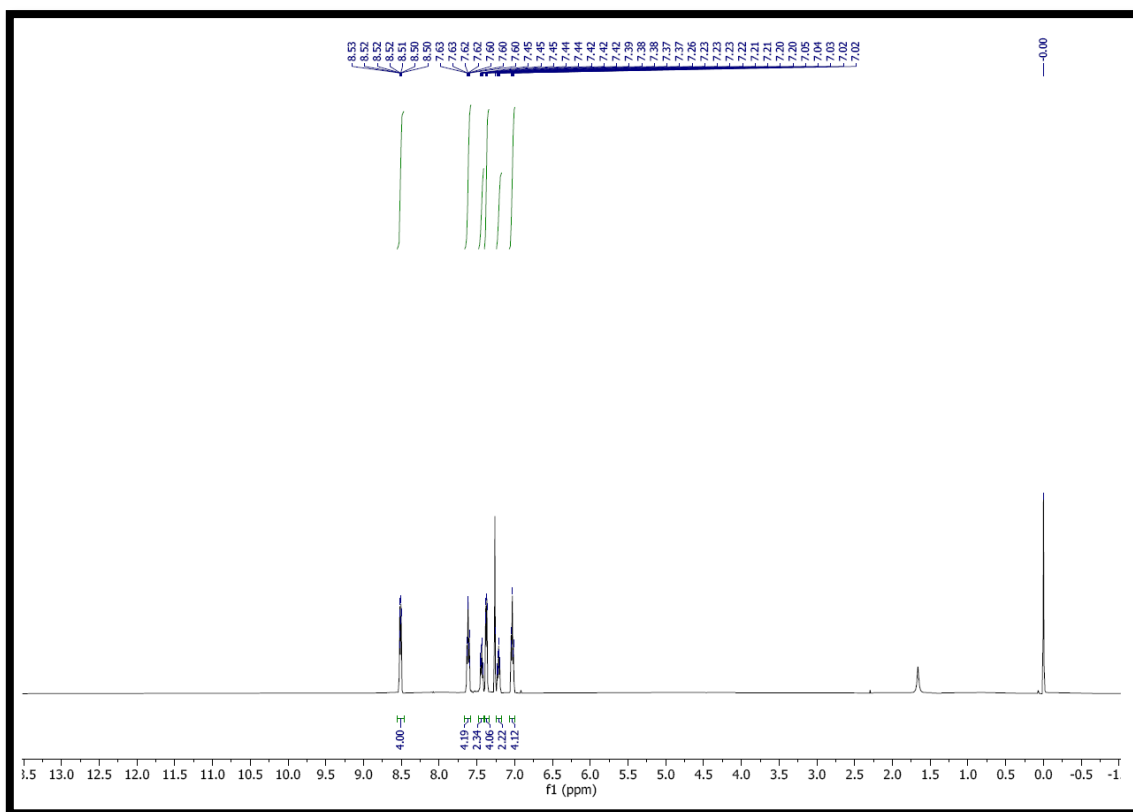

### <sup>13</sup>C NMR 2c

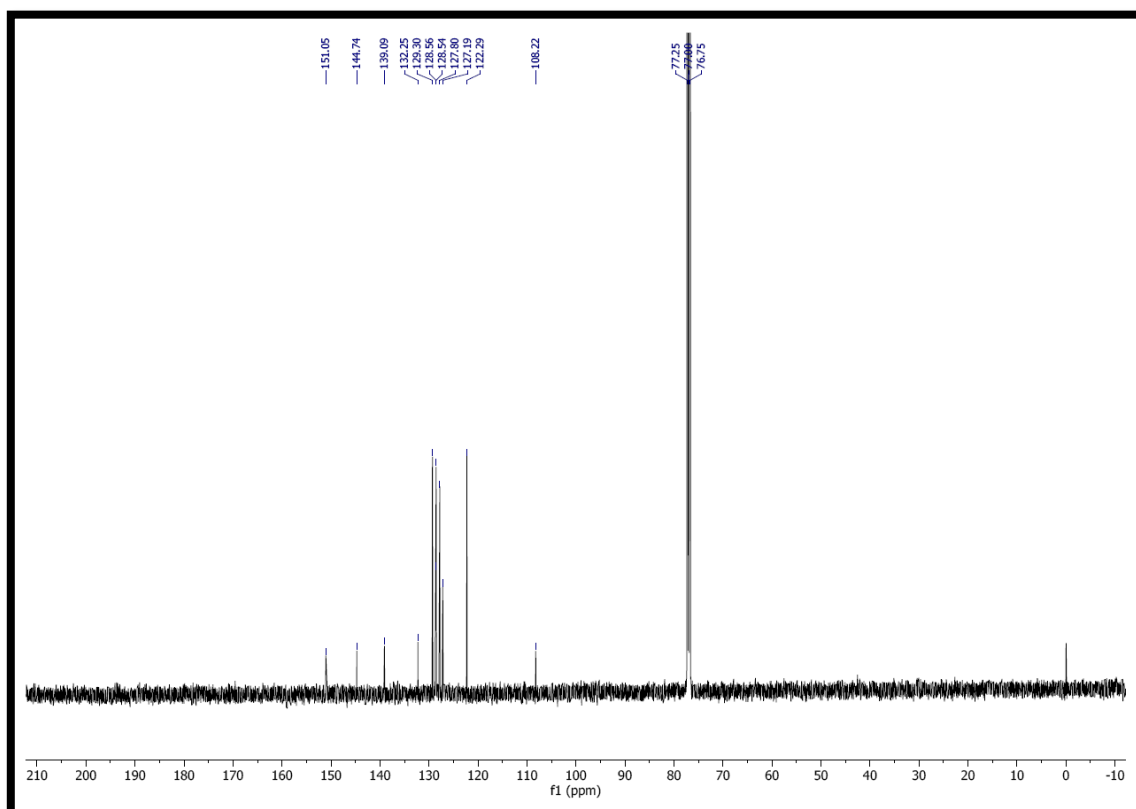

### <sup>1</sup>H NMR 2d

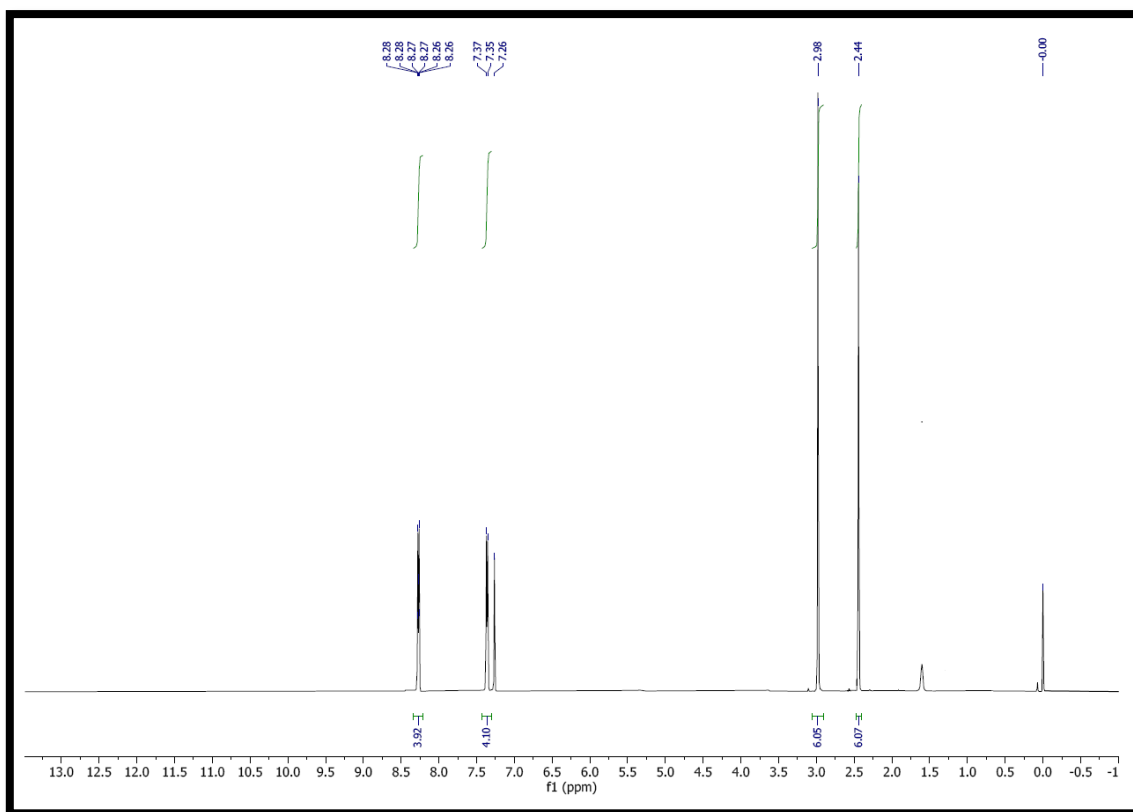

### <sup>13</sup>C NMR 2d

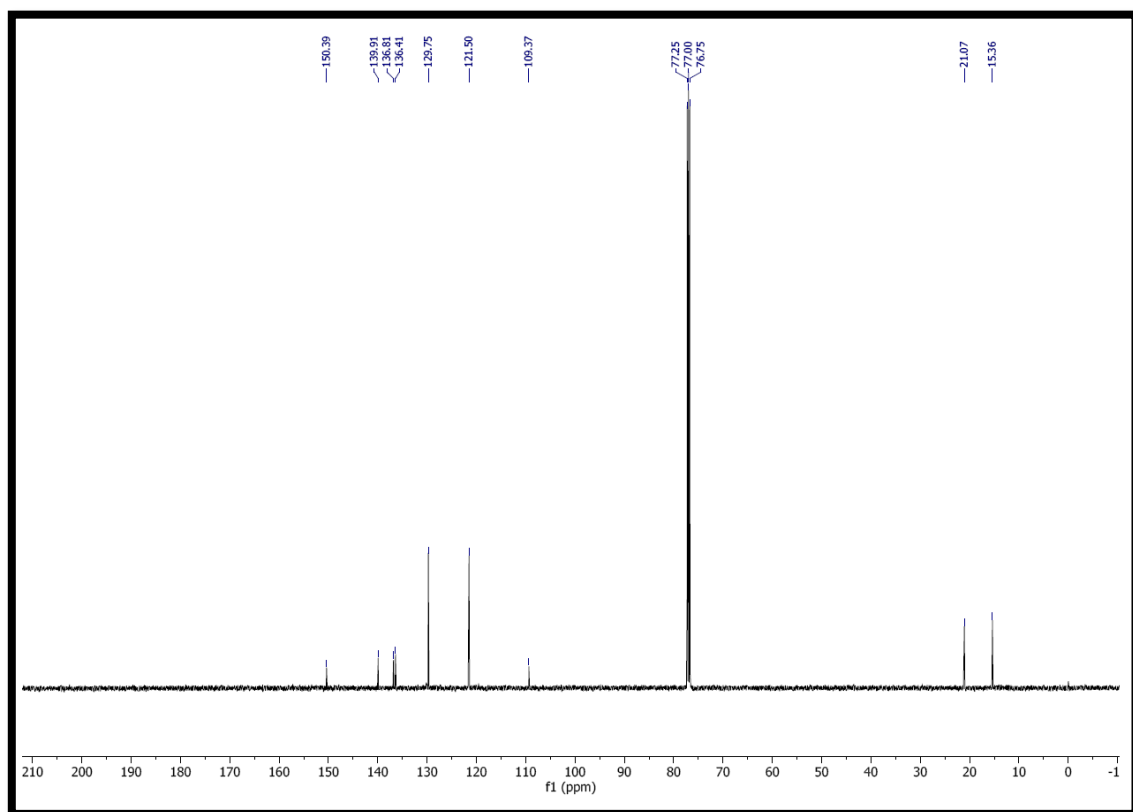

### <sup>1</sup>H NMR 2e

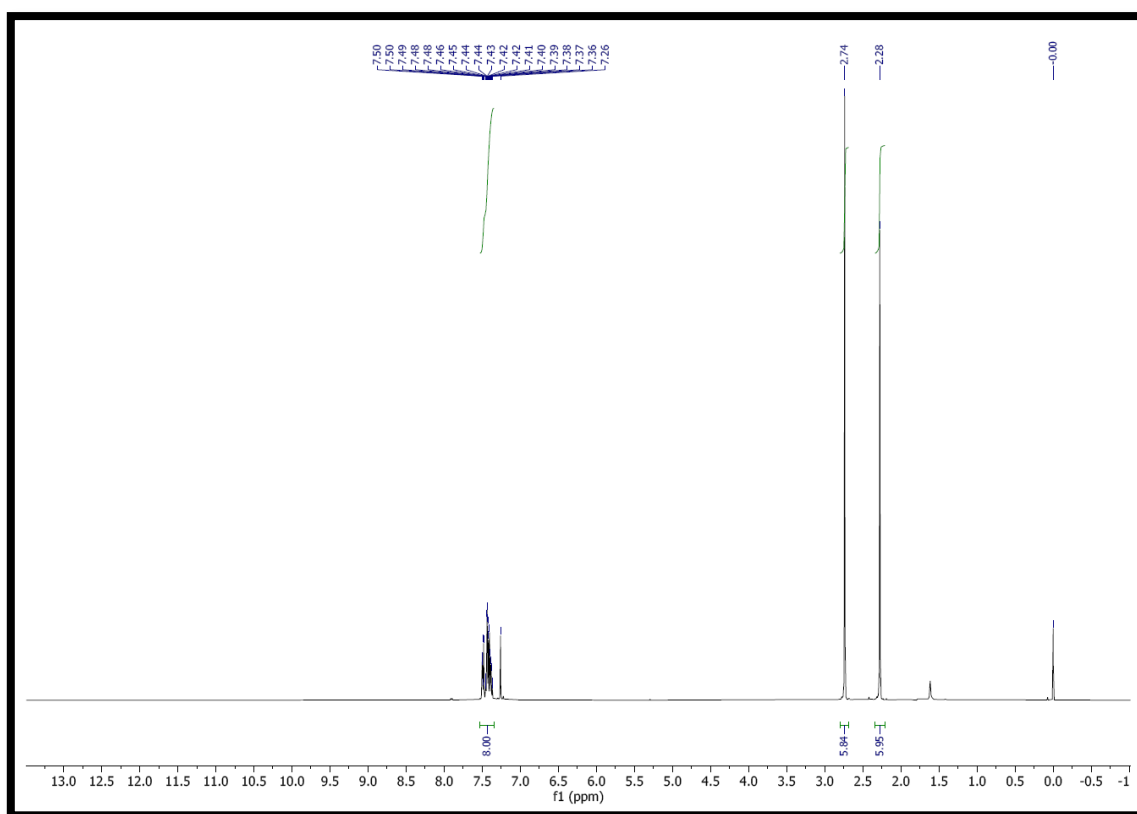

### <sup>13</sup>C NMR 2e

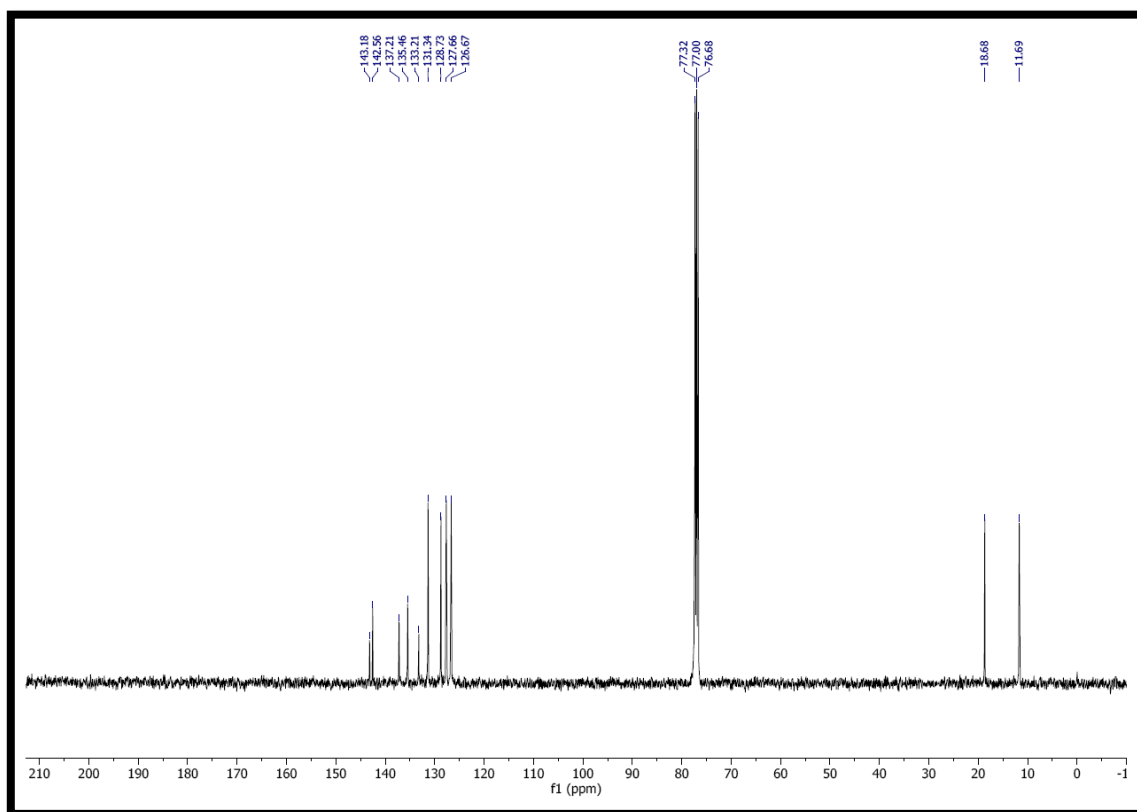

### <sup>1</sup>H NMR 2f

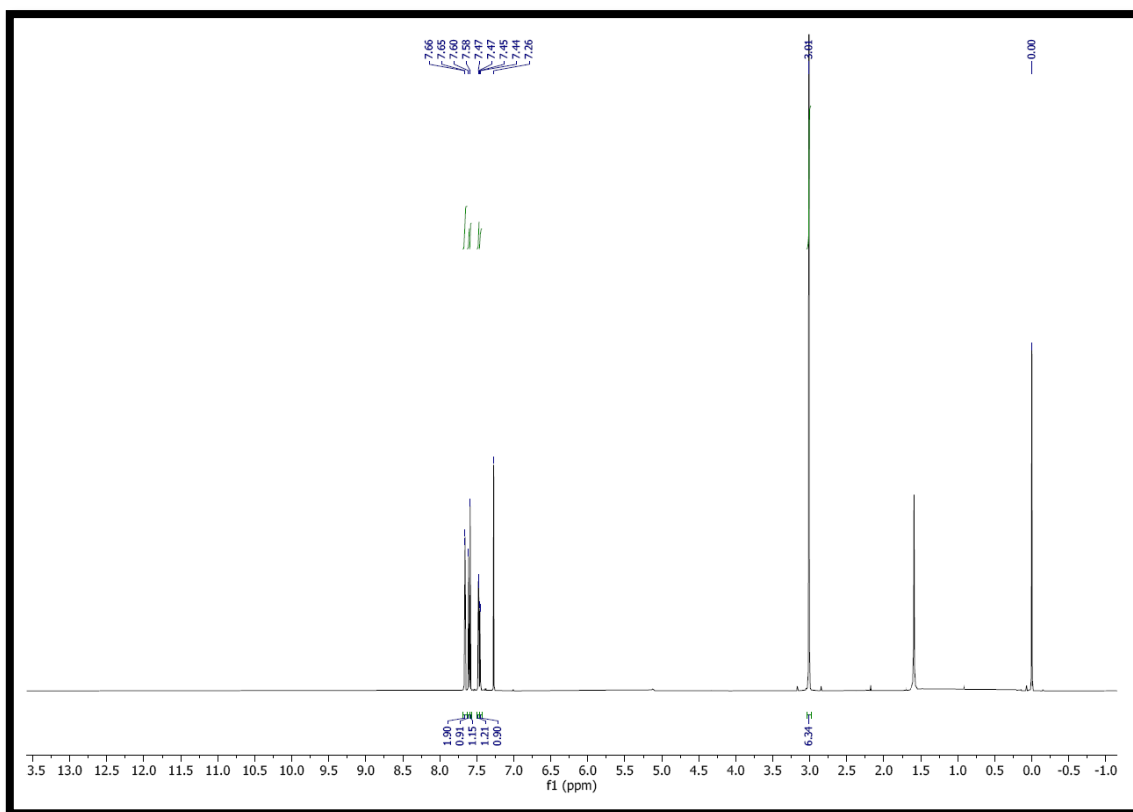

### <sup>13</sup>C NMR 2f

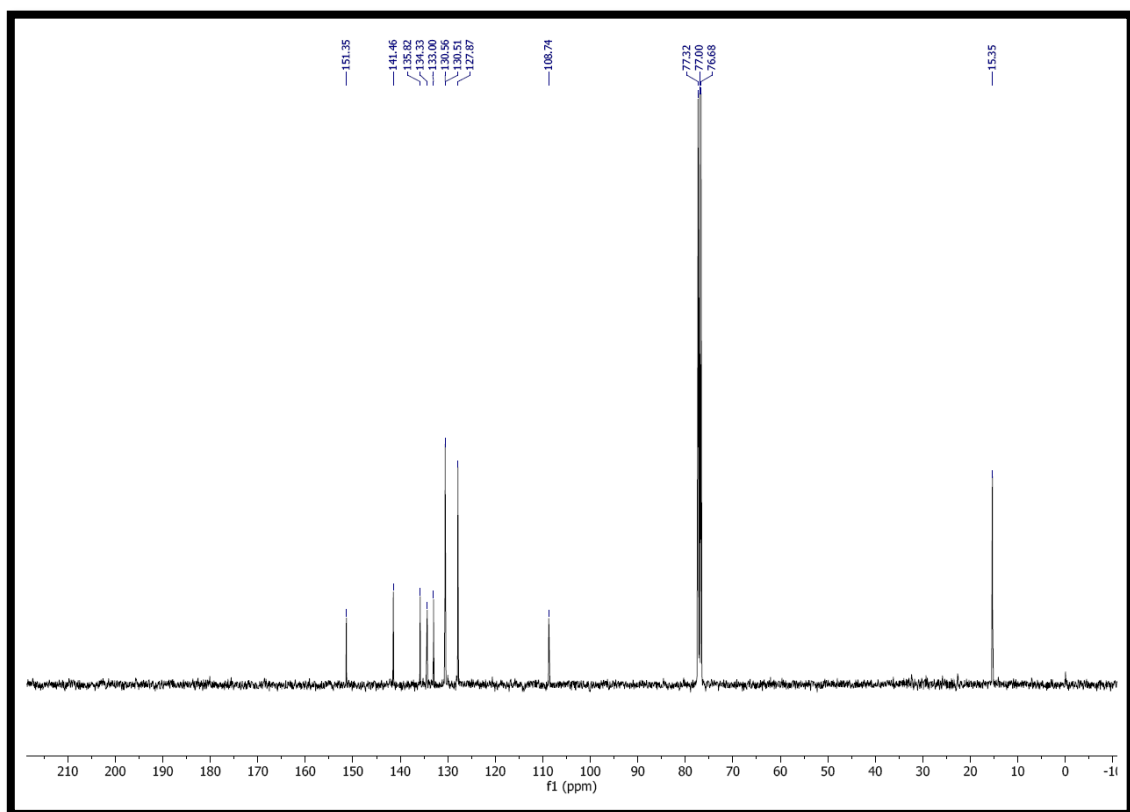

### <sup>1</sup>H NMR 2g

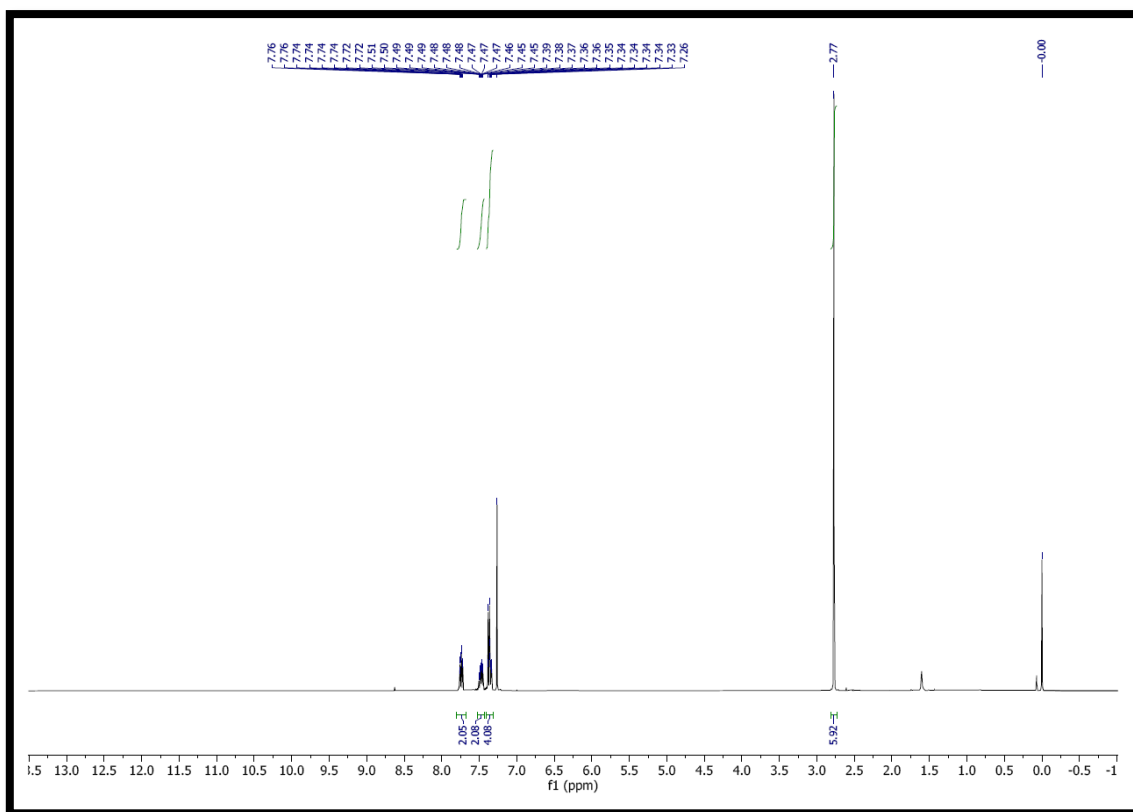

### <sup>13</sup>C NMR 2g

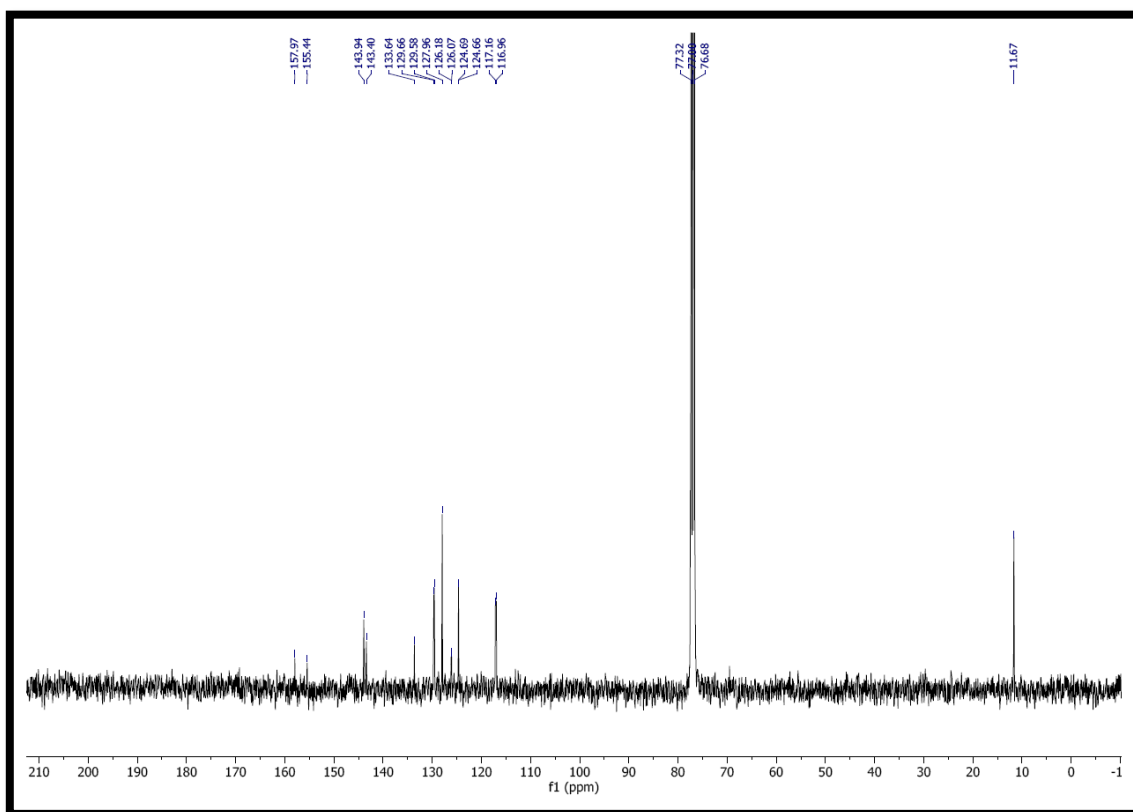

### <sup>1</sup>H NMR 2h

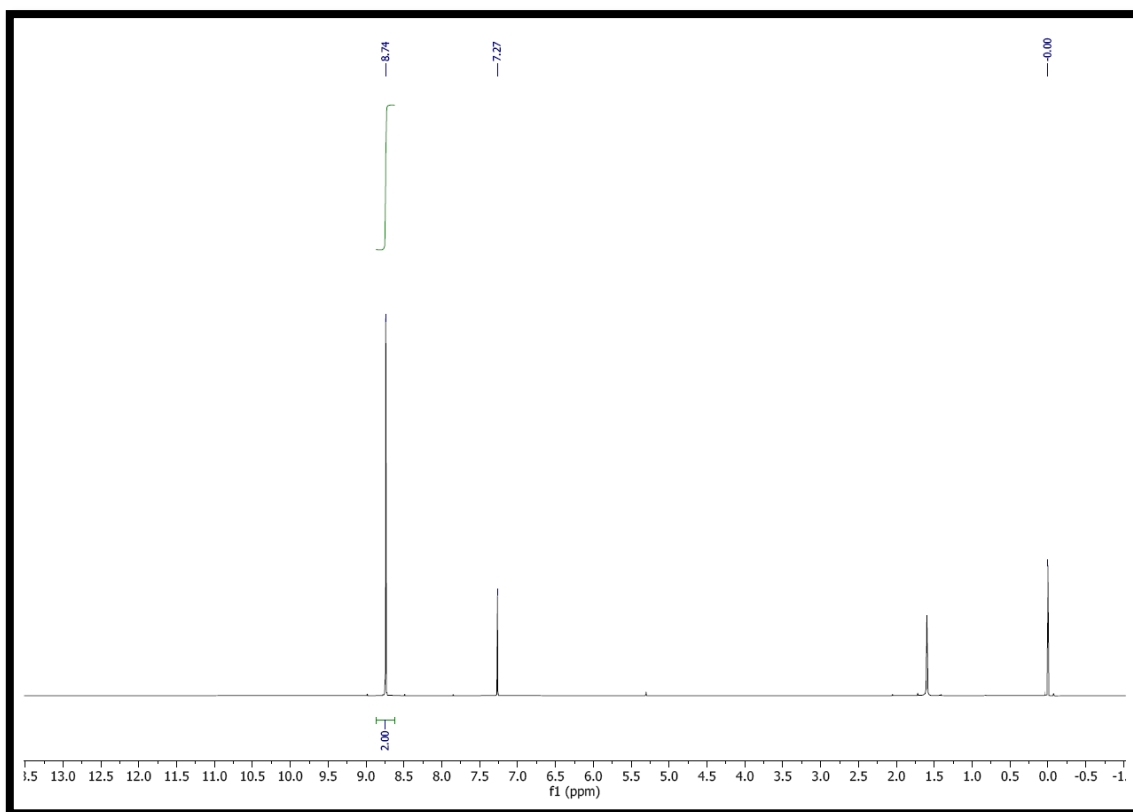

### <sup>13</sup>C NMR 2h

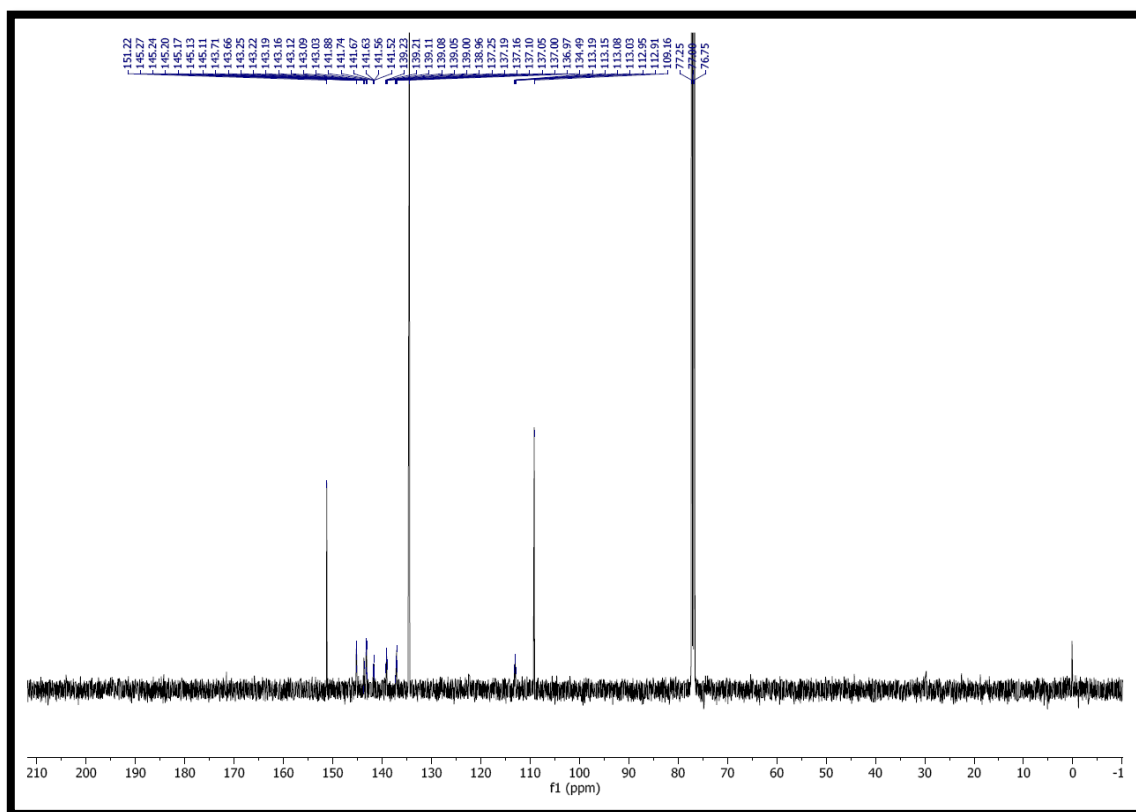

### $^1\text{H}$ NMR 2i

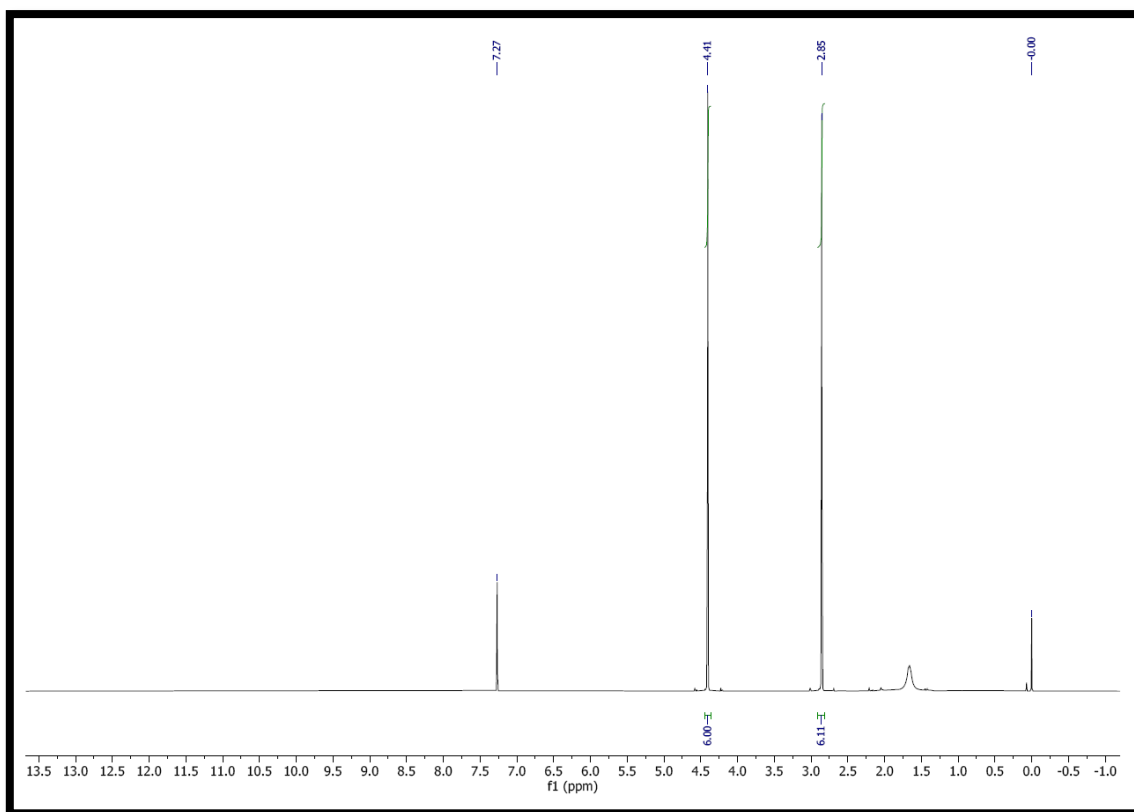

### $^{13}\text{C}$ NMR 2i

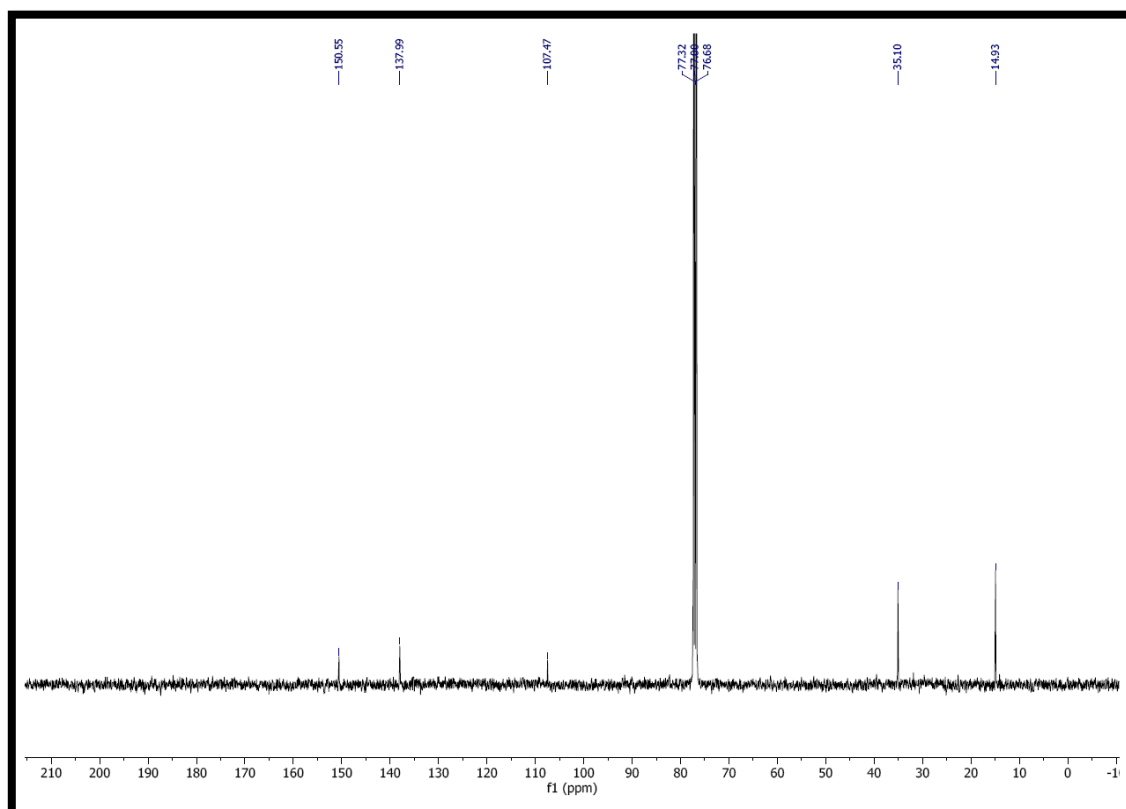



### <sup>1</sup>H NMR 2j

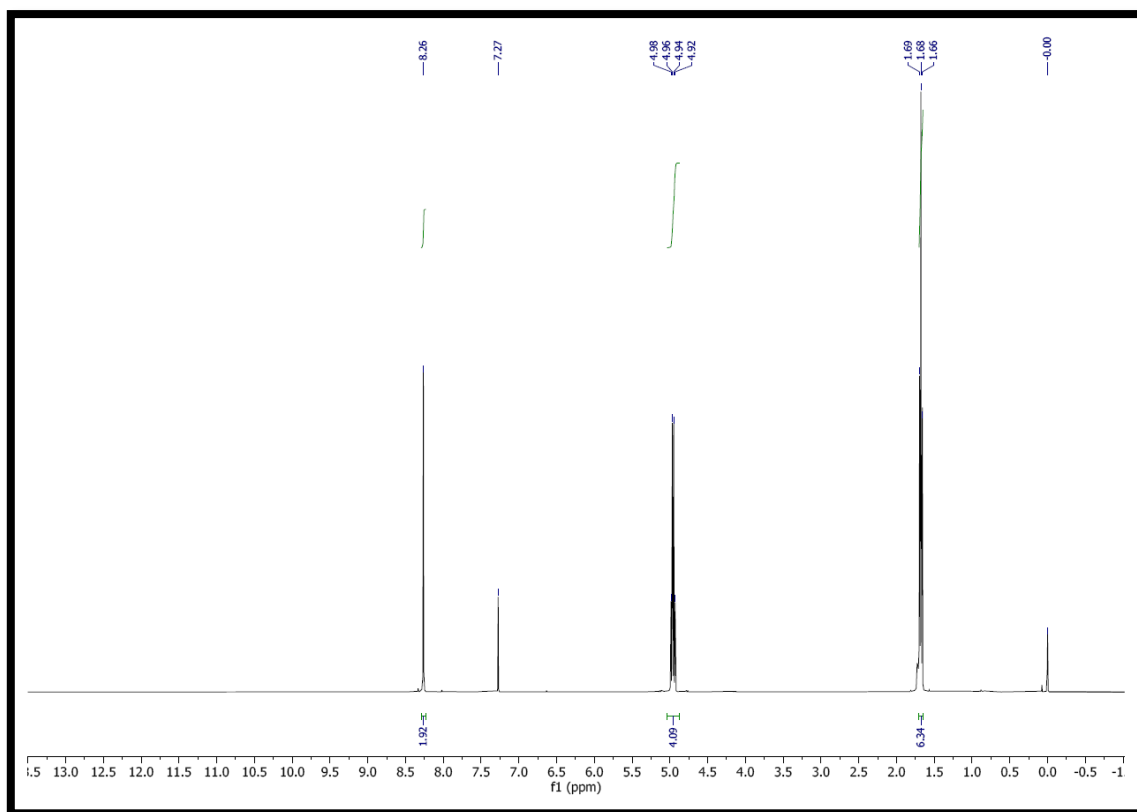

### <sup>13</sup>C NMR 2j

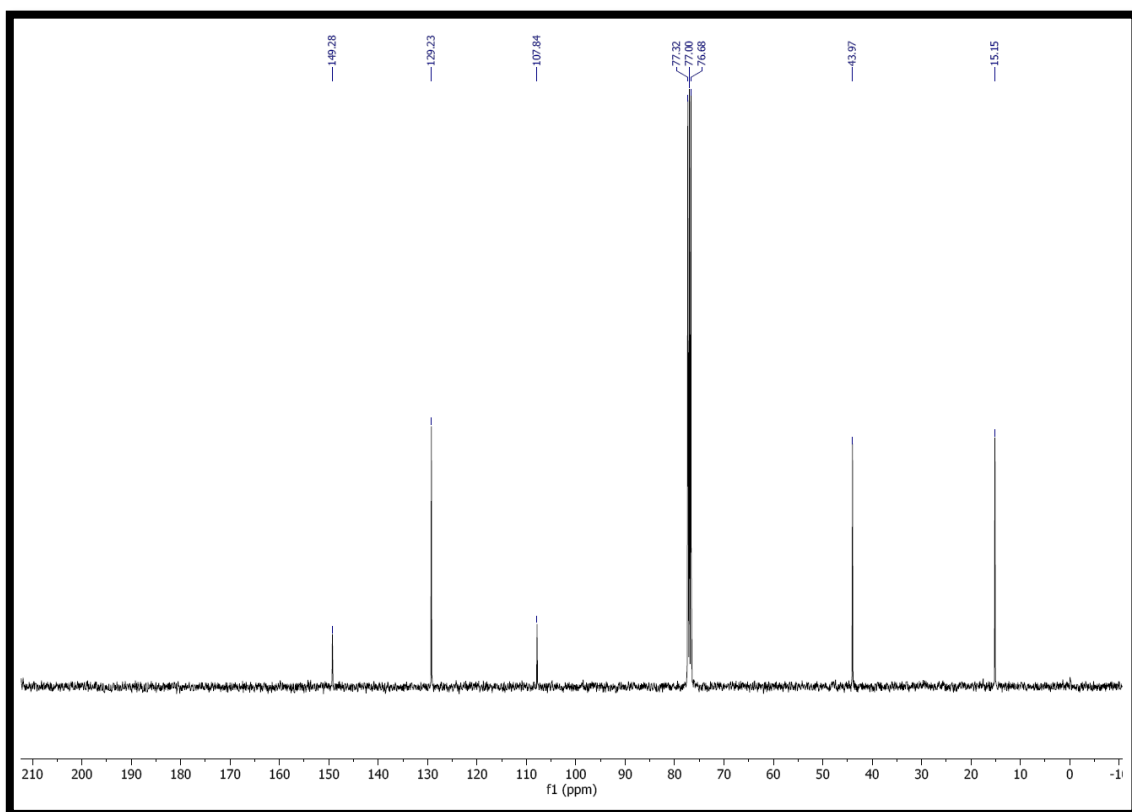

### <sup>1</sup>H NMR 2k

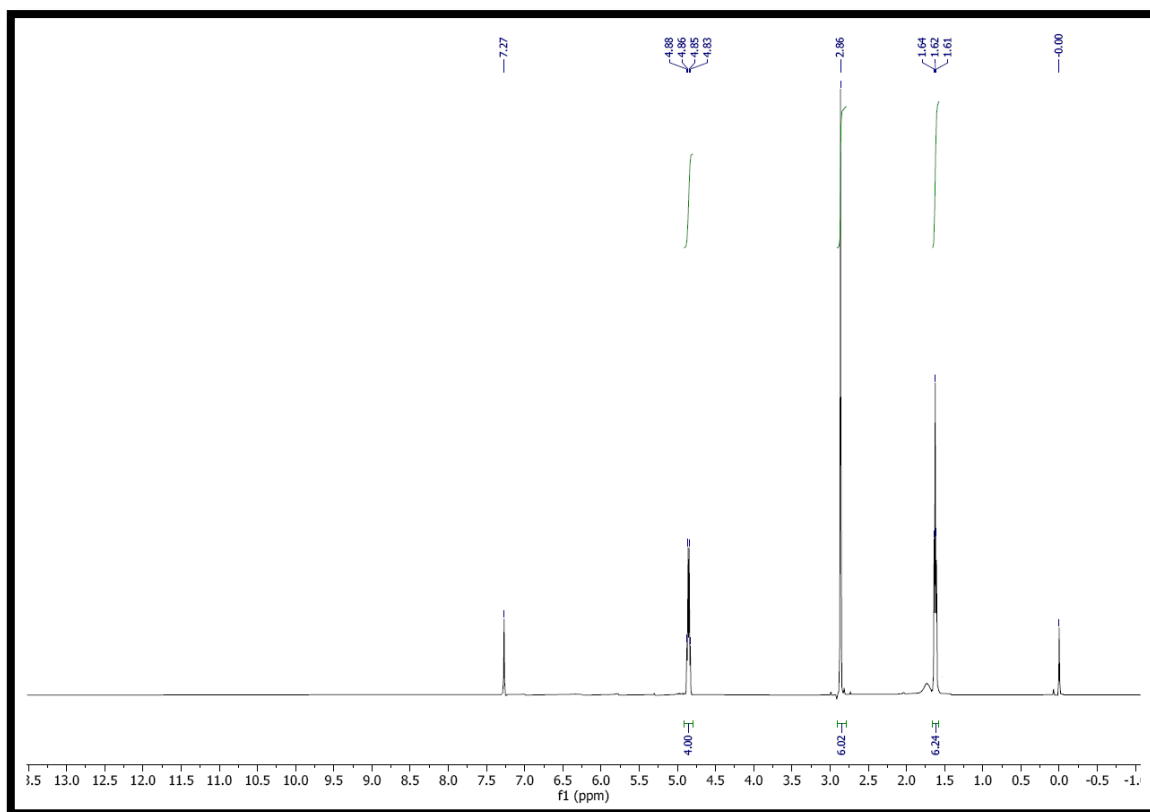

### <sup>13</sup>C NMR 2k

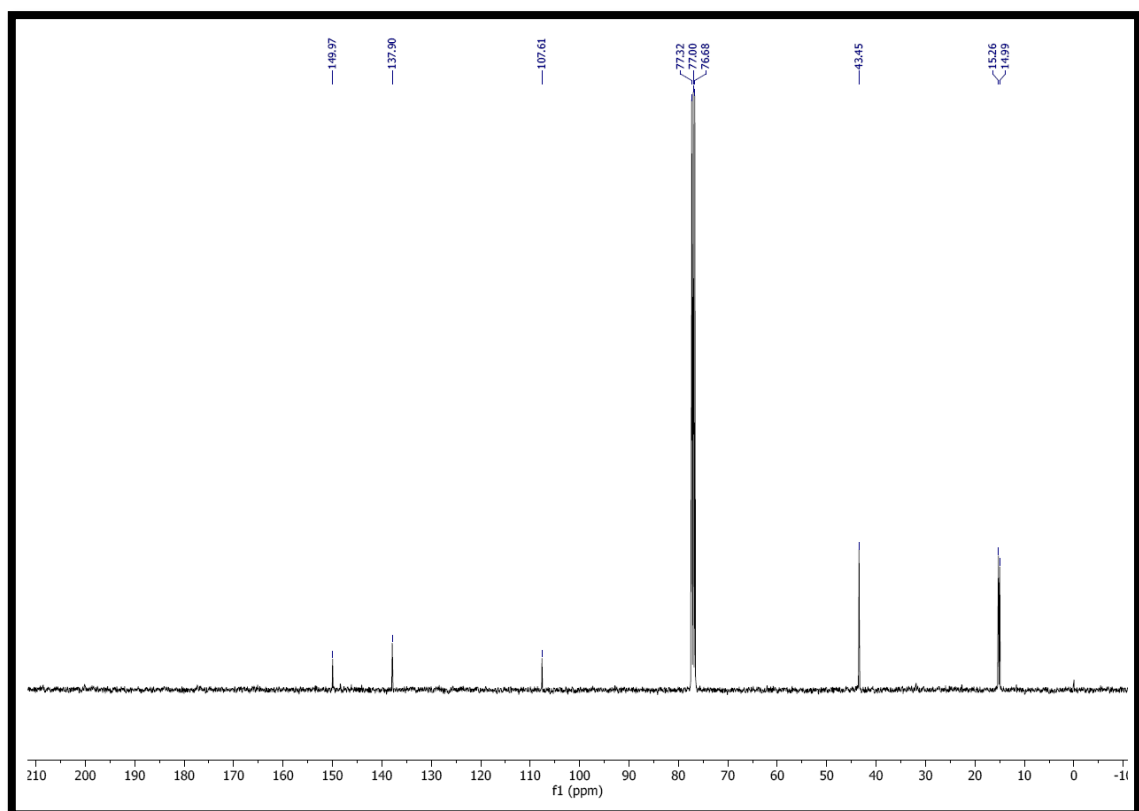

# <sup>1</sup>H NMR 2I

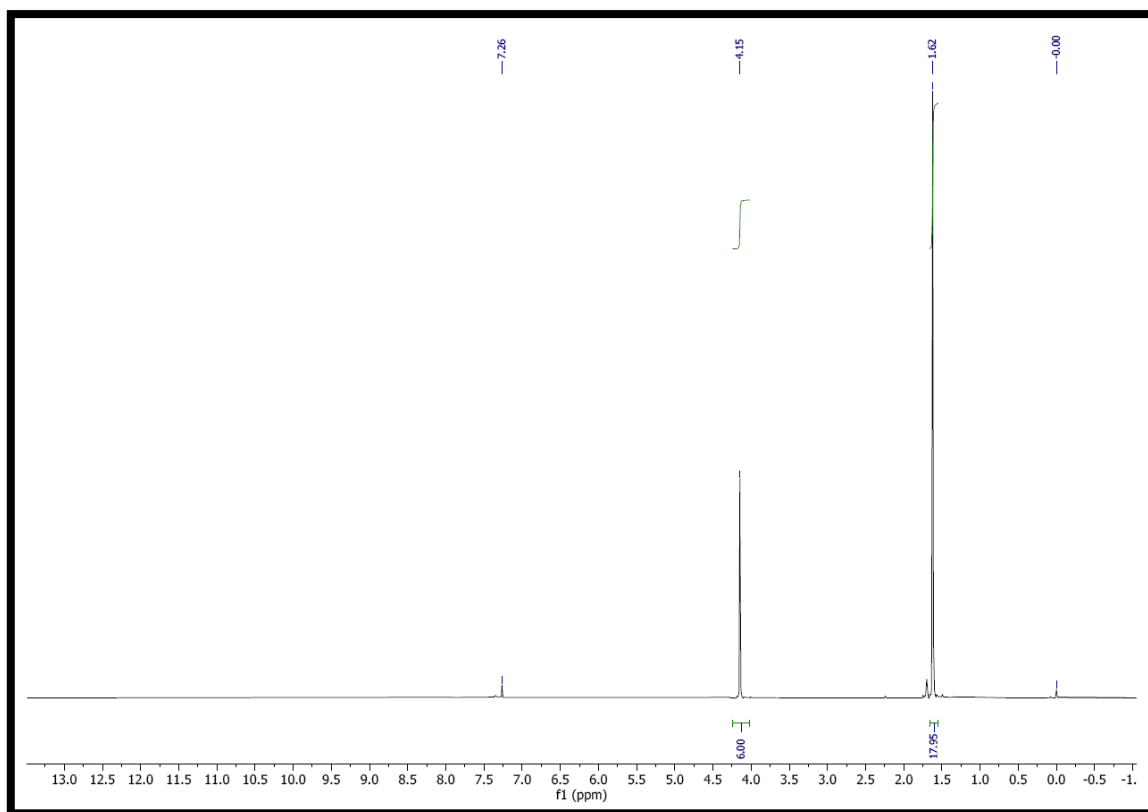

# <sup>13</sup>C NMR 2I

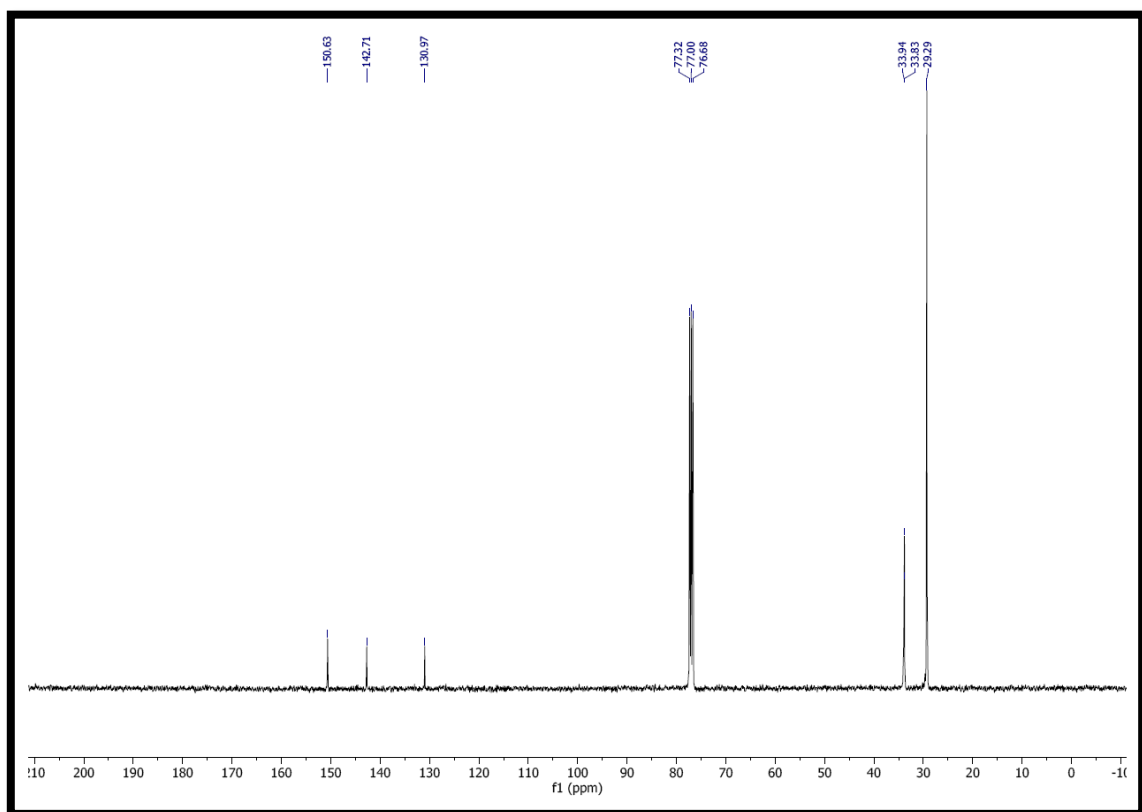

**$^{19}\text{F}$  NMR of 2h**

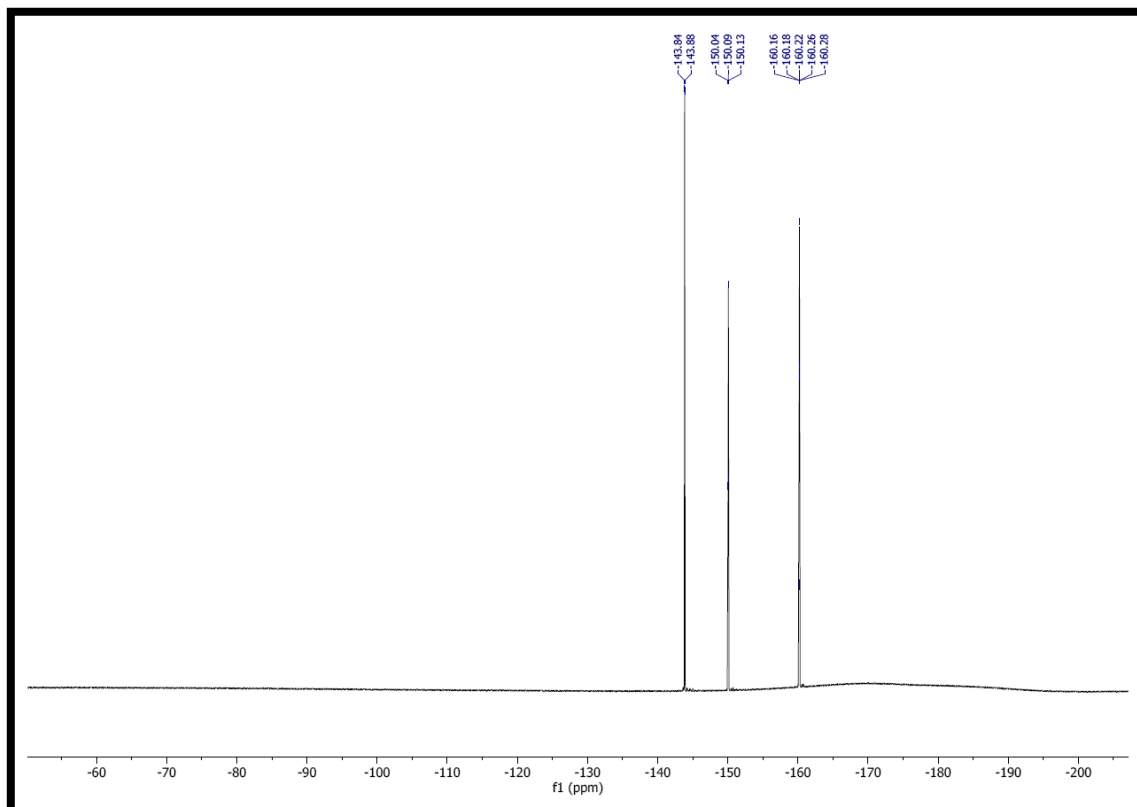

### <sup>1</sup>H NMR 3a

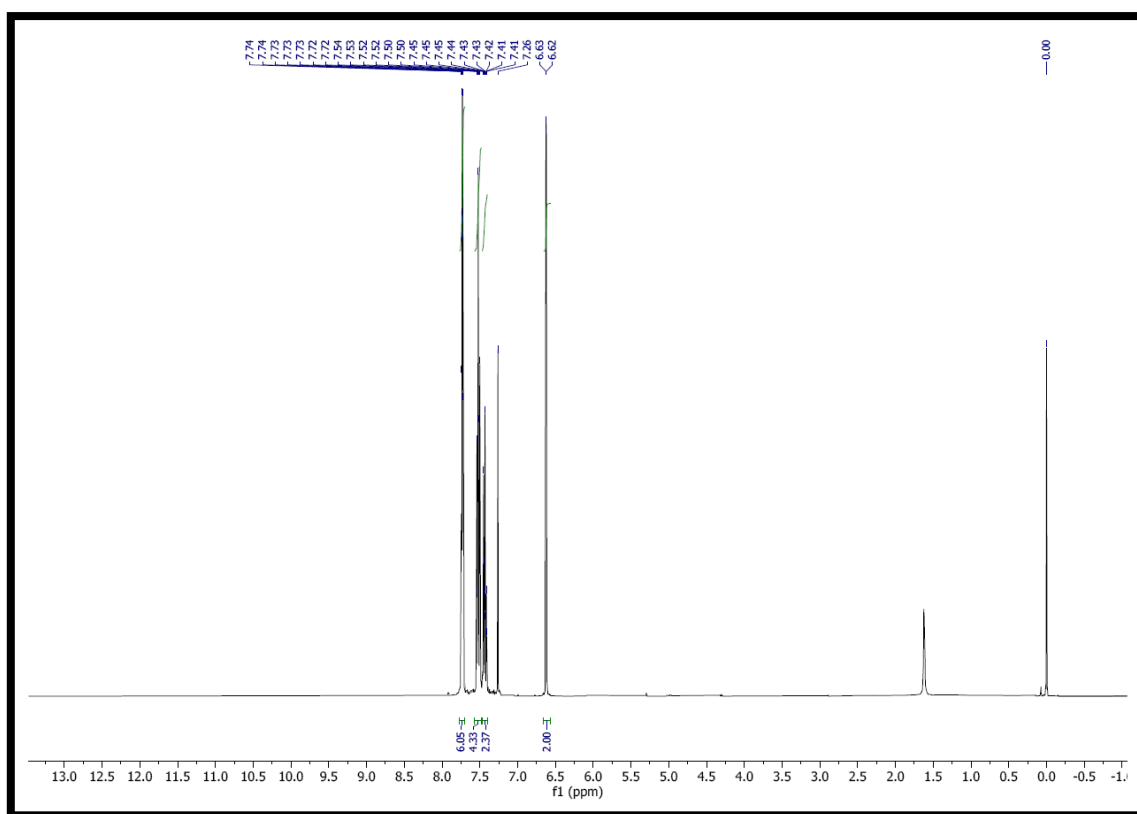

### <sup>13</sup>C NMR 3a

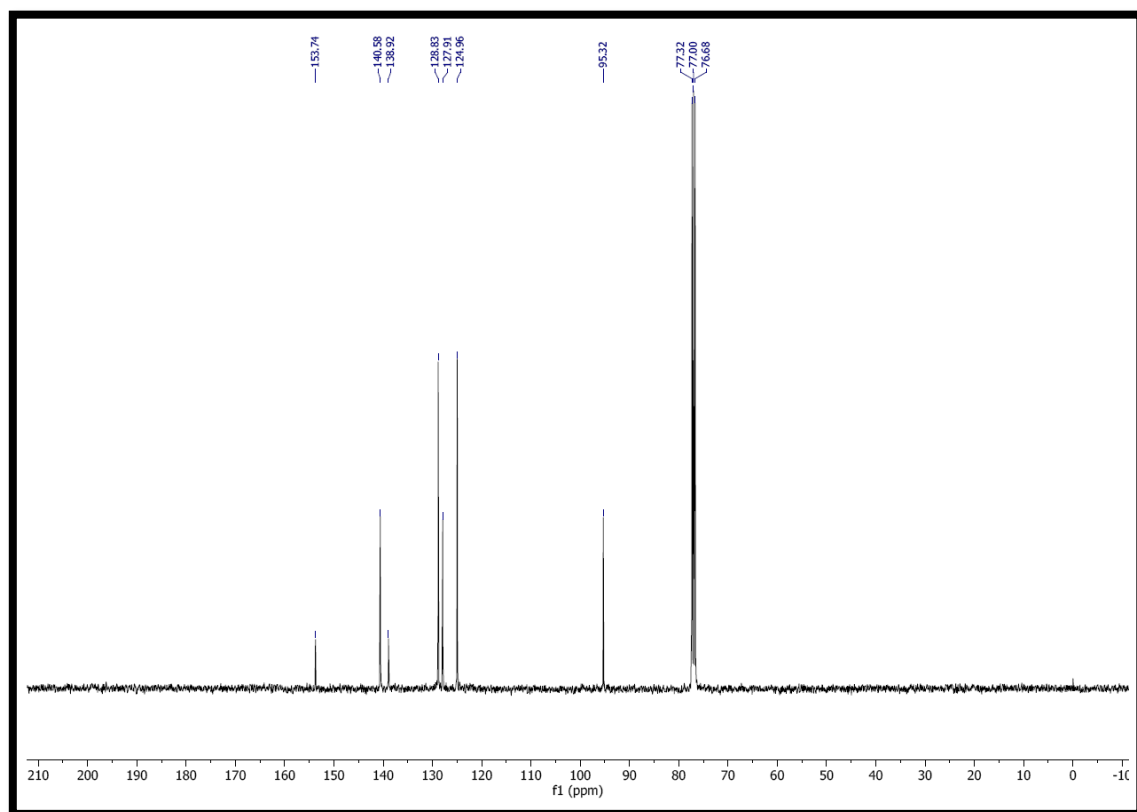

### <sup>1</sup>H NMR 3b

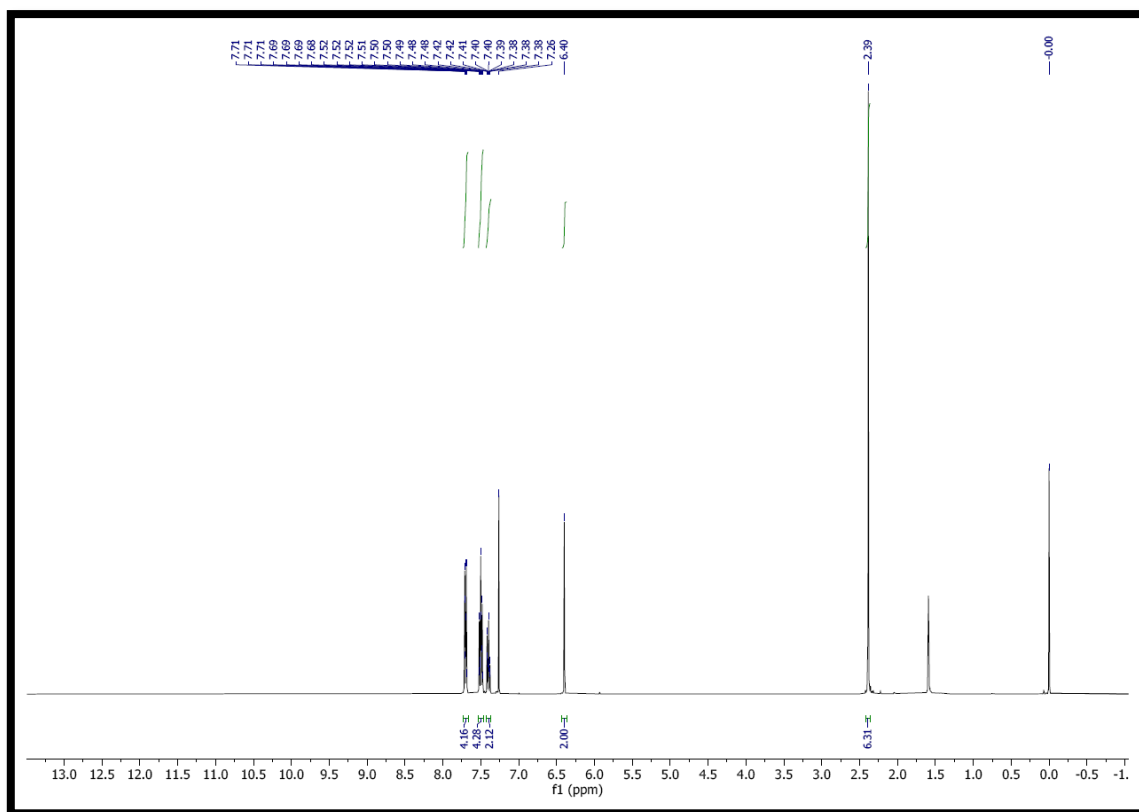

### <sup>13</sup>C NMR 3b

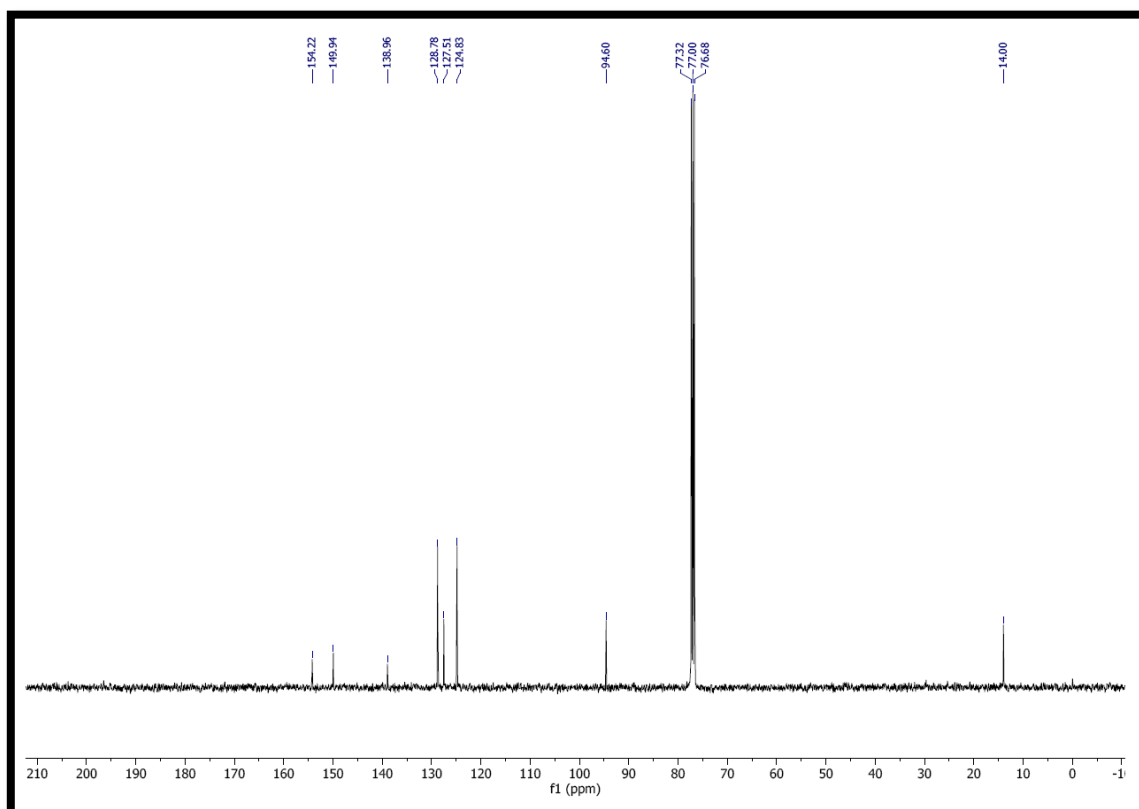

### <sup>1</sup>H NMR 3c

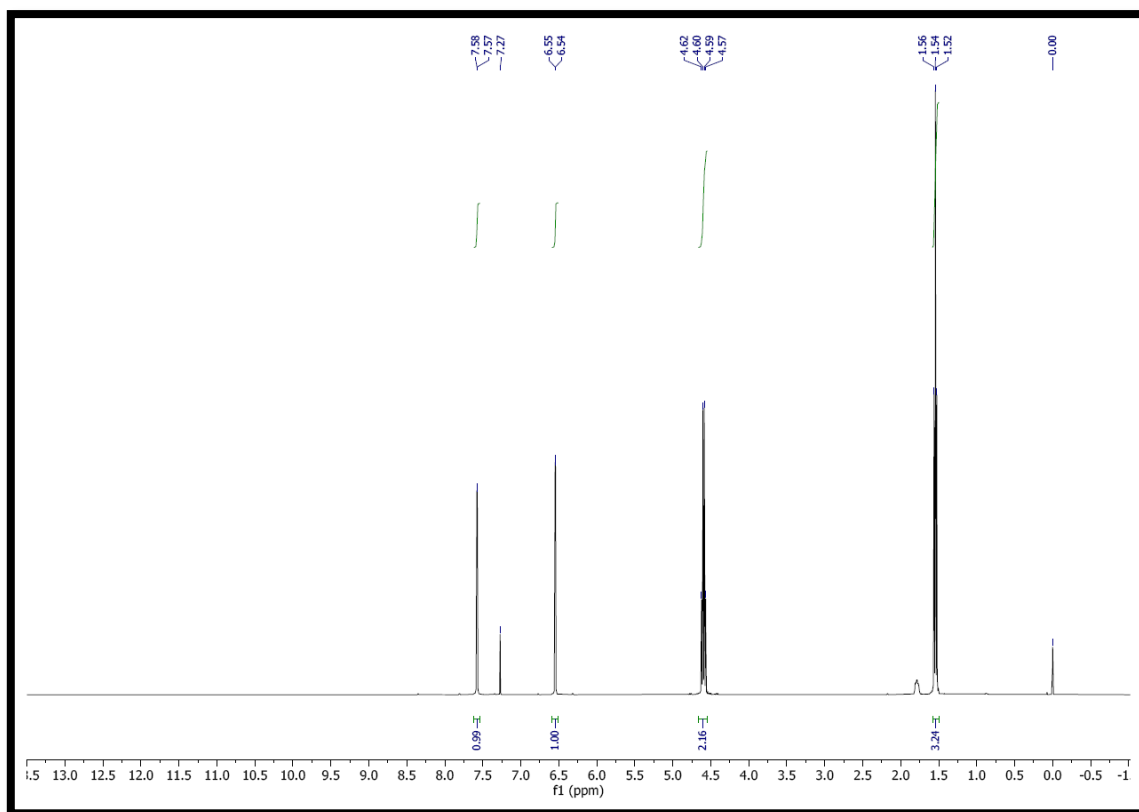

### <sup>13</sup>C NMR 3c

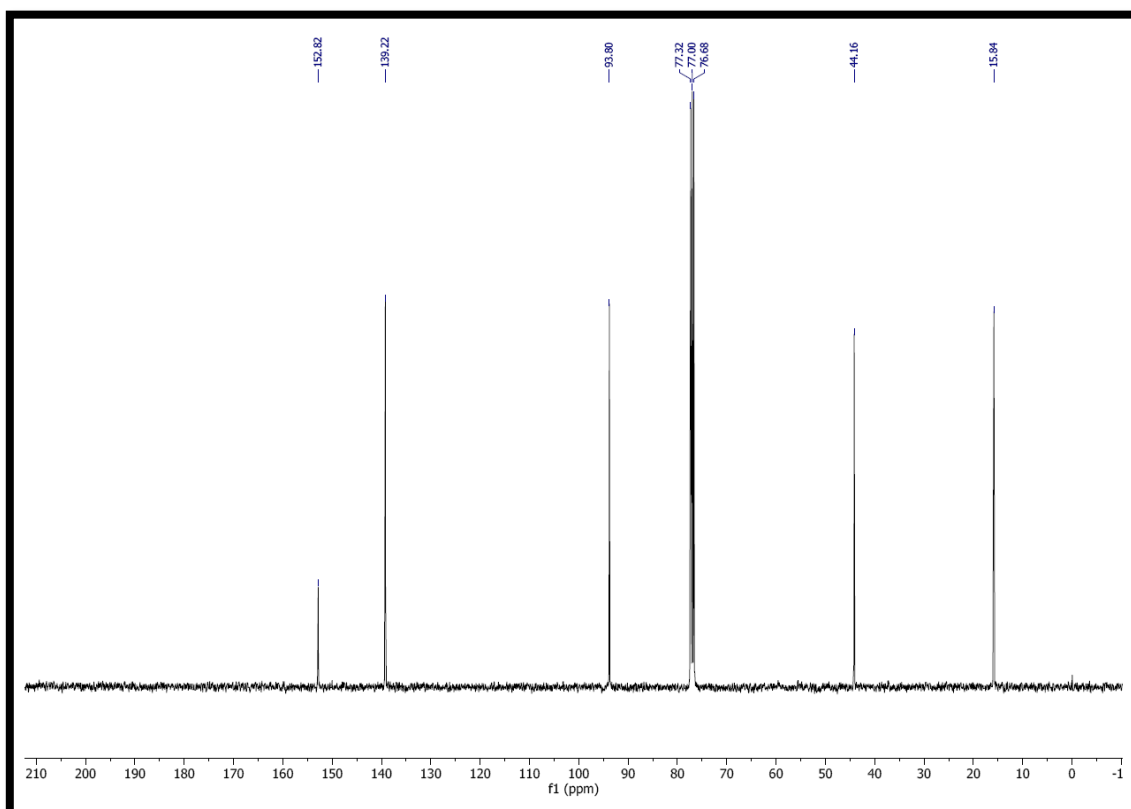

### <sup>1</sup>H NMR 3d

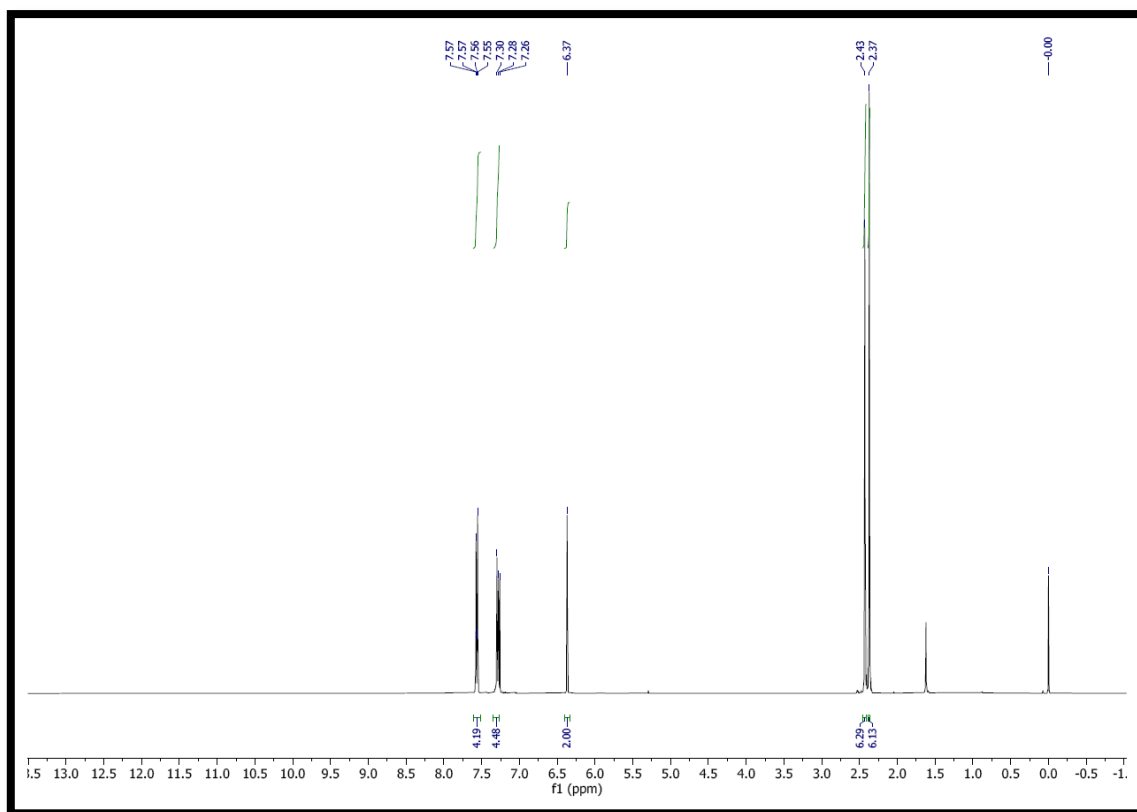

### <sup>13</sup>C NMR 3d

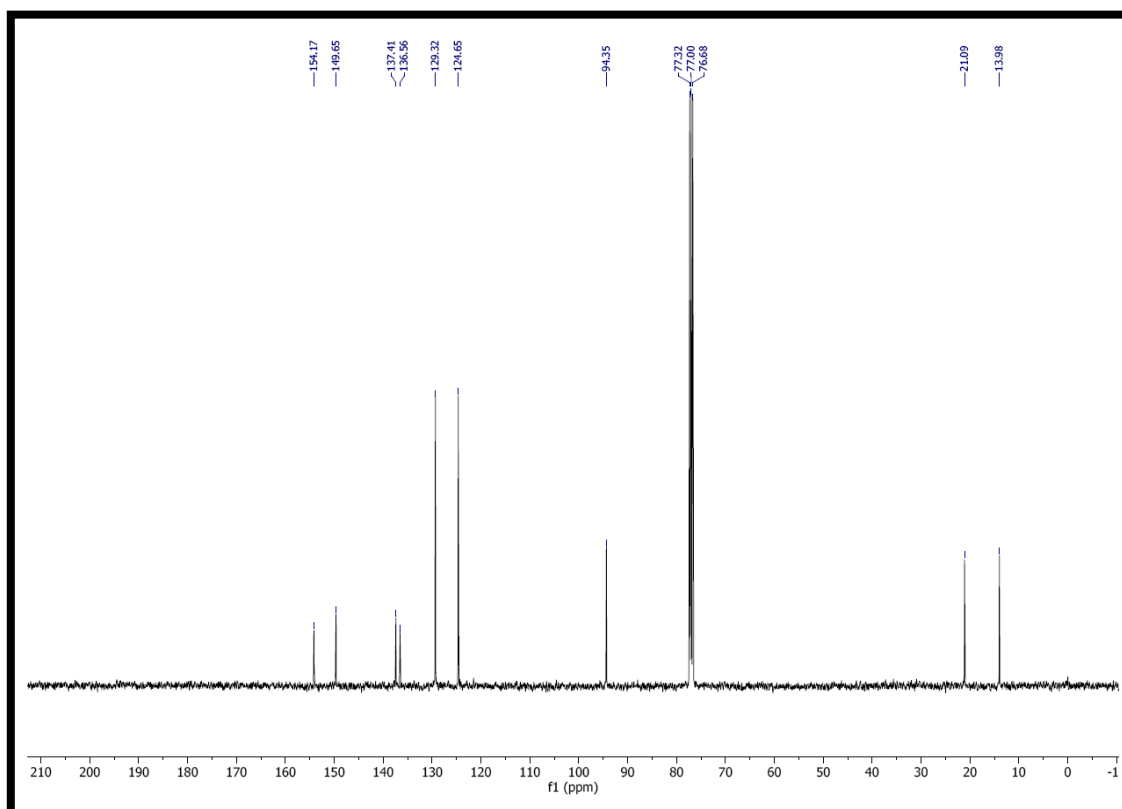



### <sup>1</sup>H NMR 3e

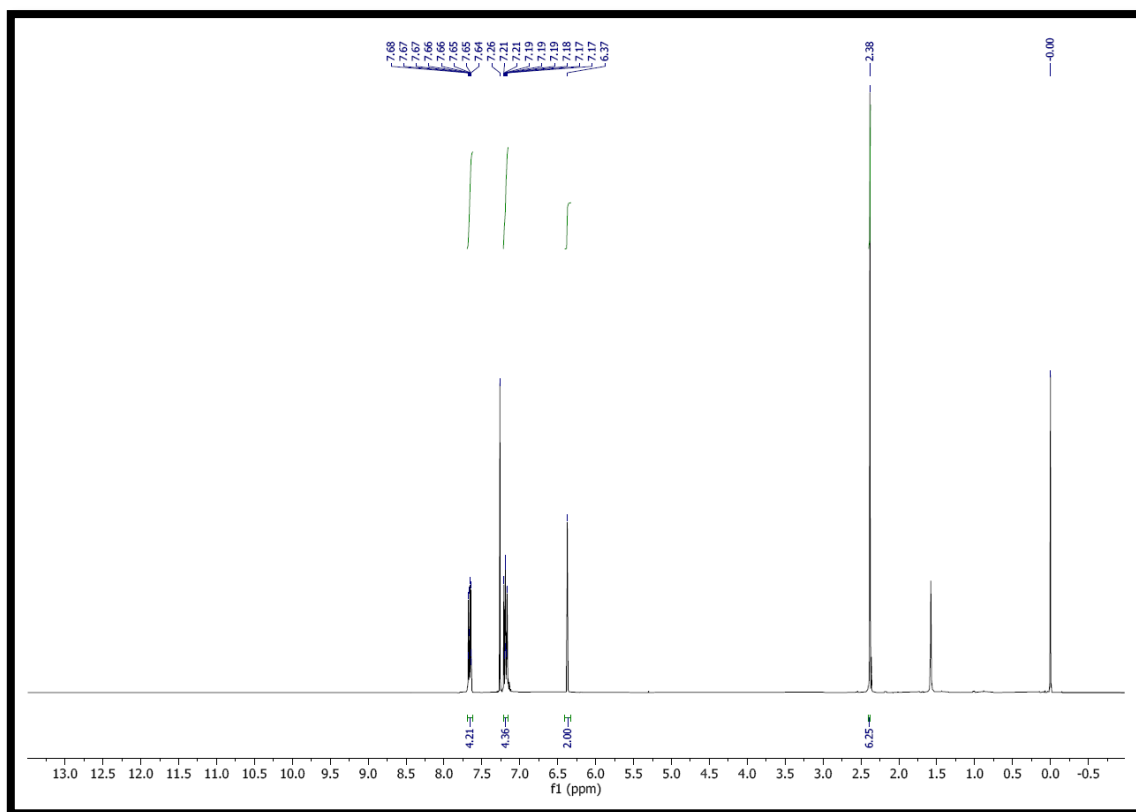

### <sup>13</sup>C NMR 3e

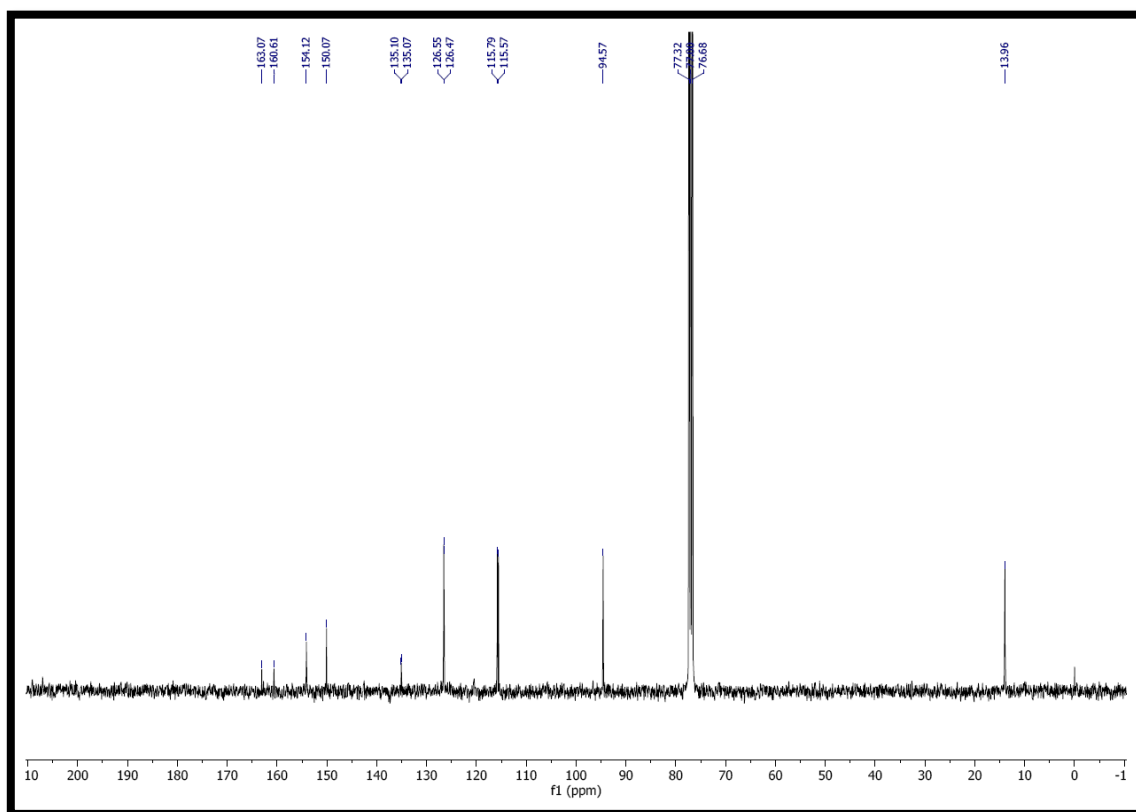

### <sup>1</sup>H NMR 3f

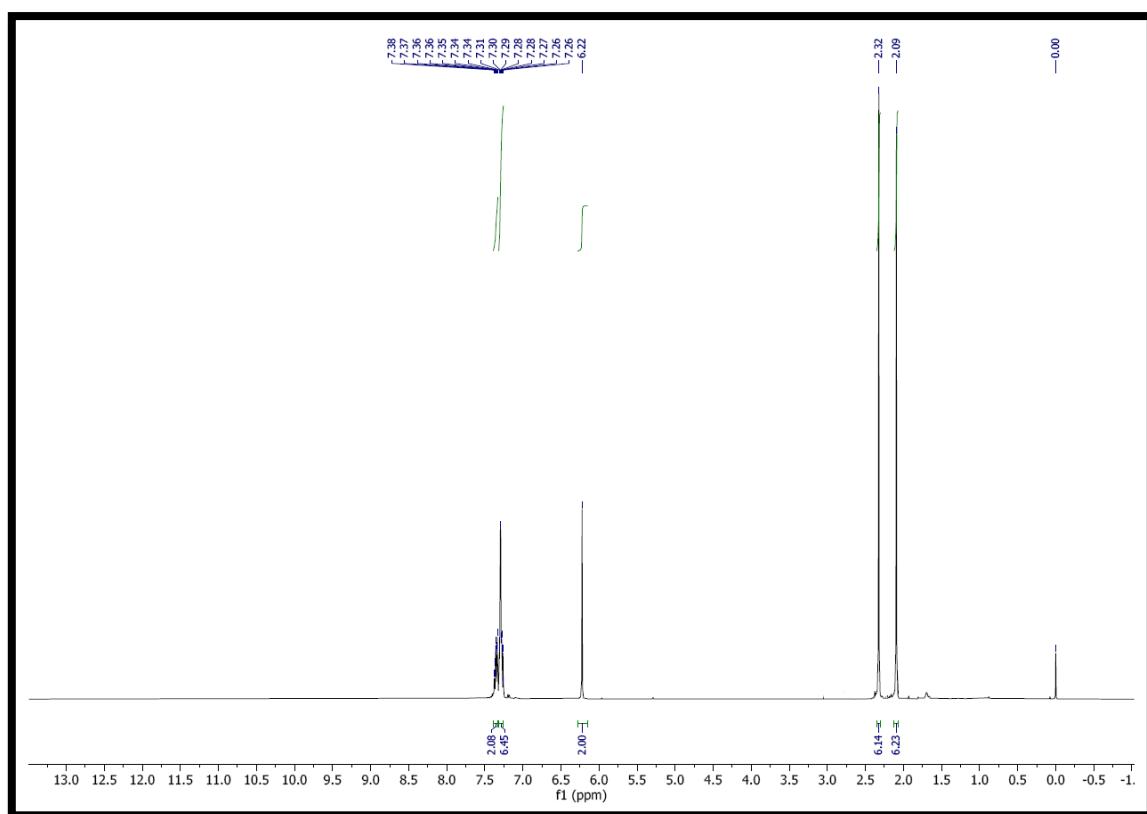

### <sup>13</sup>C NMR 3f

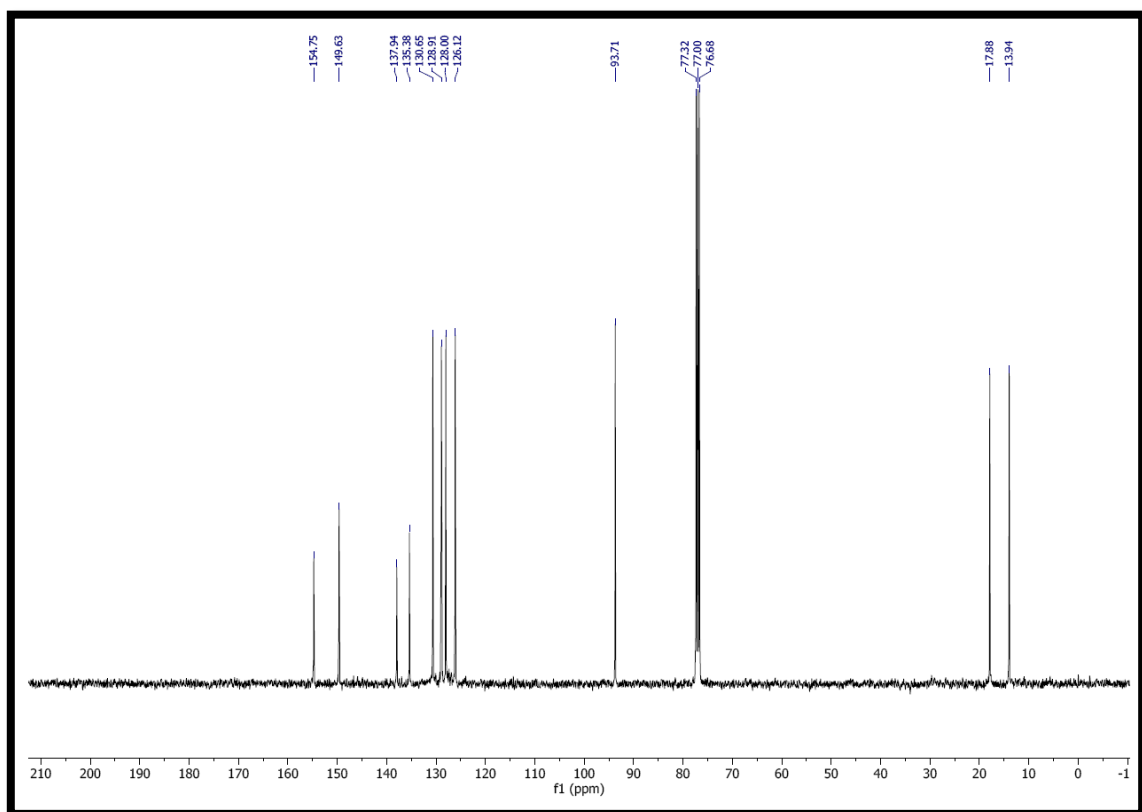

### <sup>1</sup>H NMR 4a

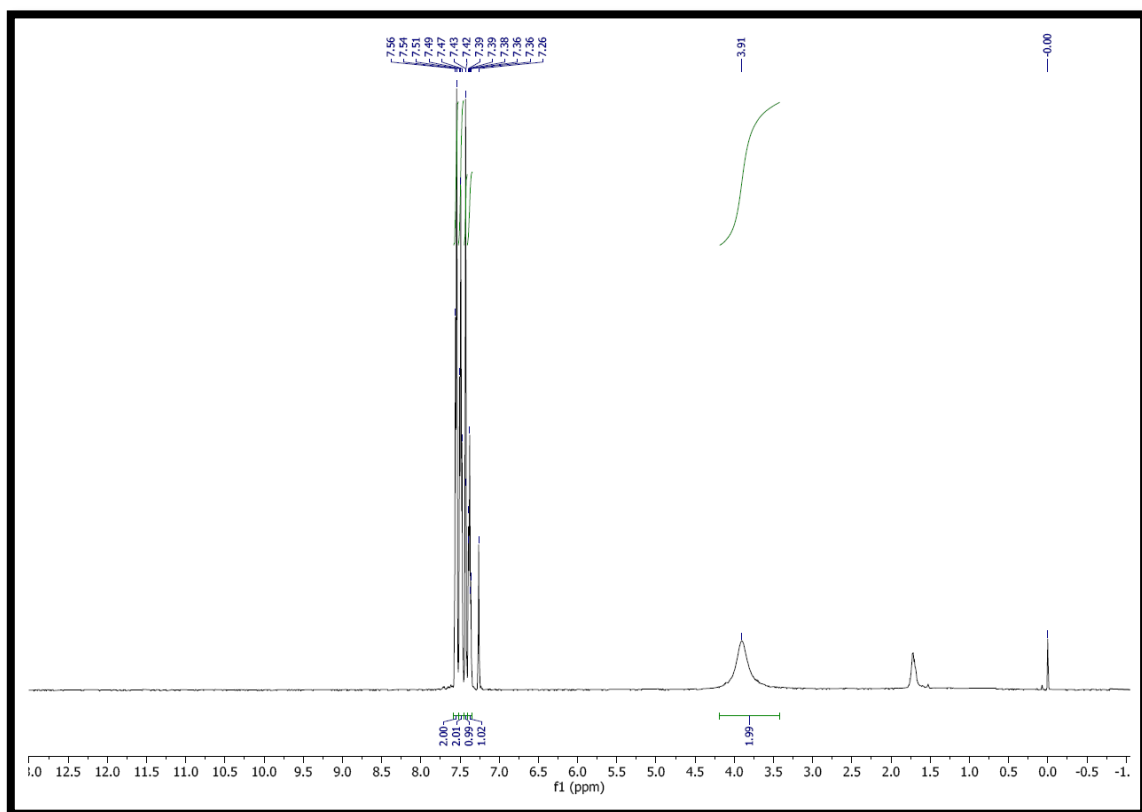

### <sup>13</sup>C NMR 4a

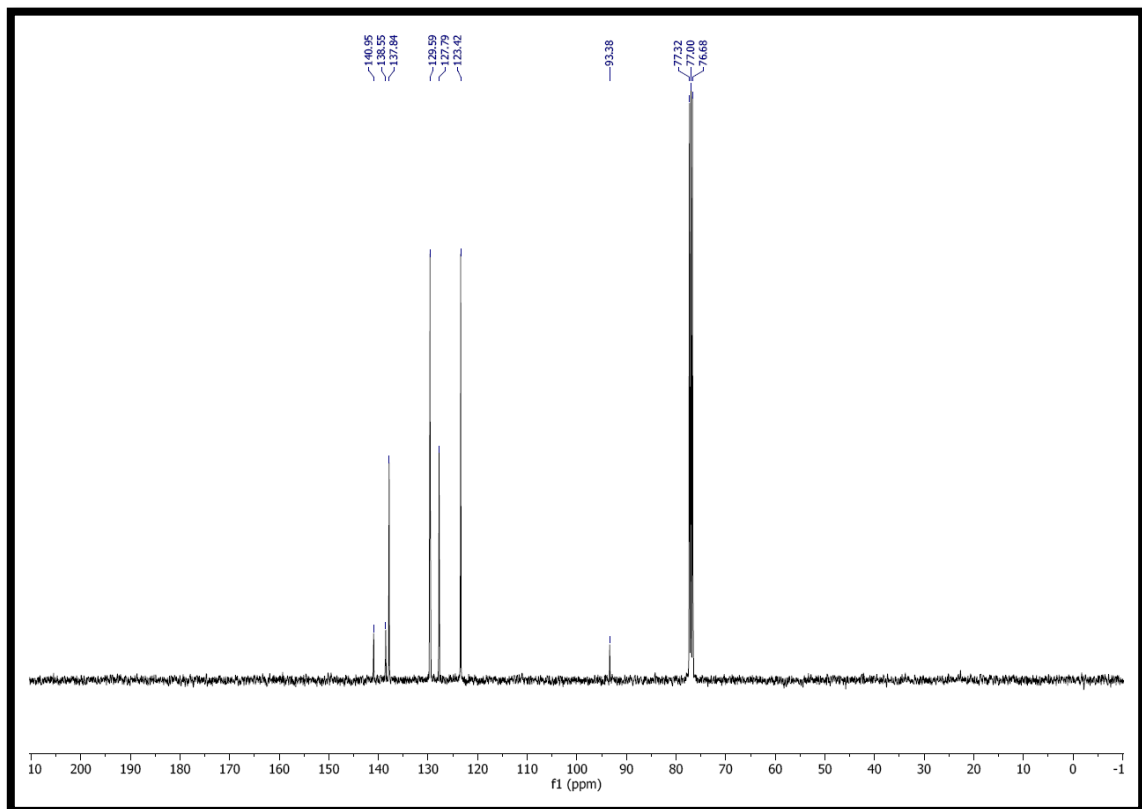

### <sup>1</sup>H NMR 4b

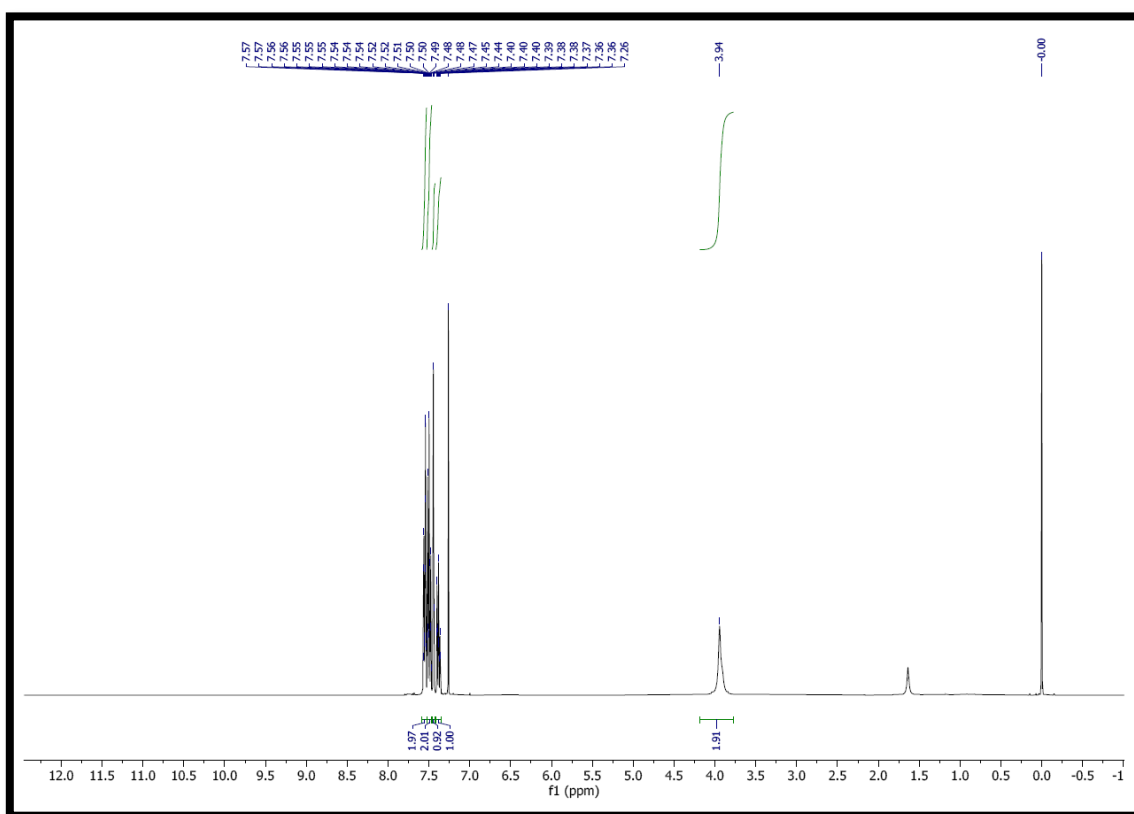

### <sup>13</sup>C NMR 4b

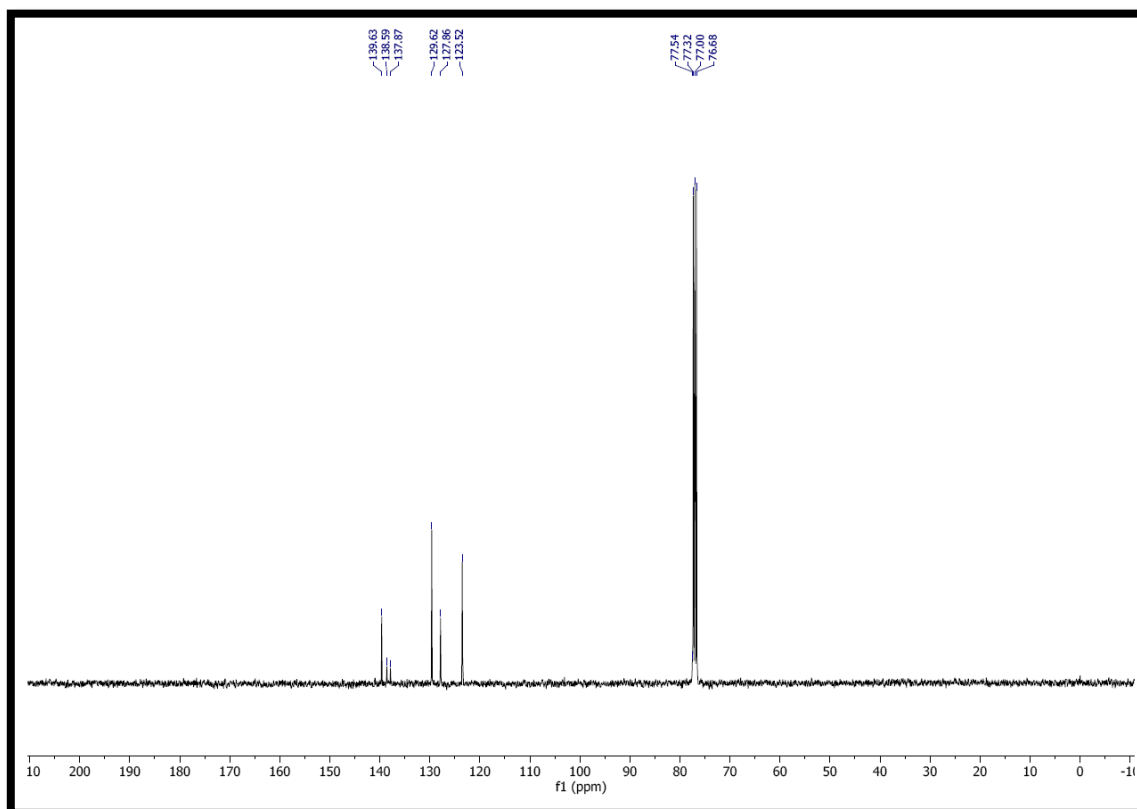

### $^1\text{H NMR}$ 4c

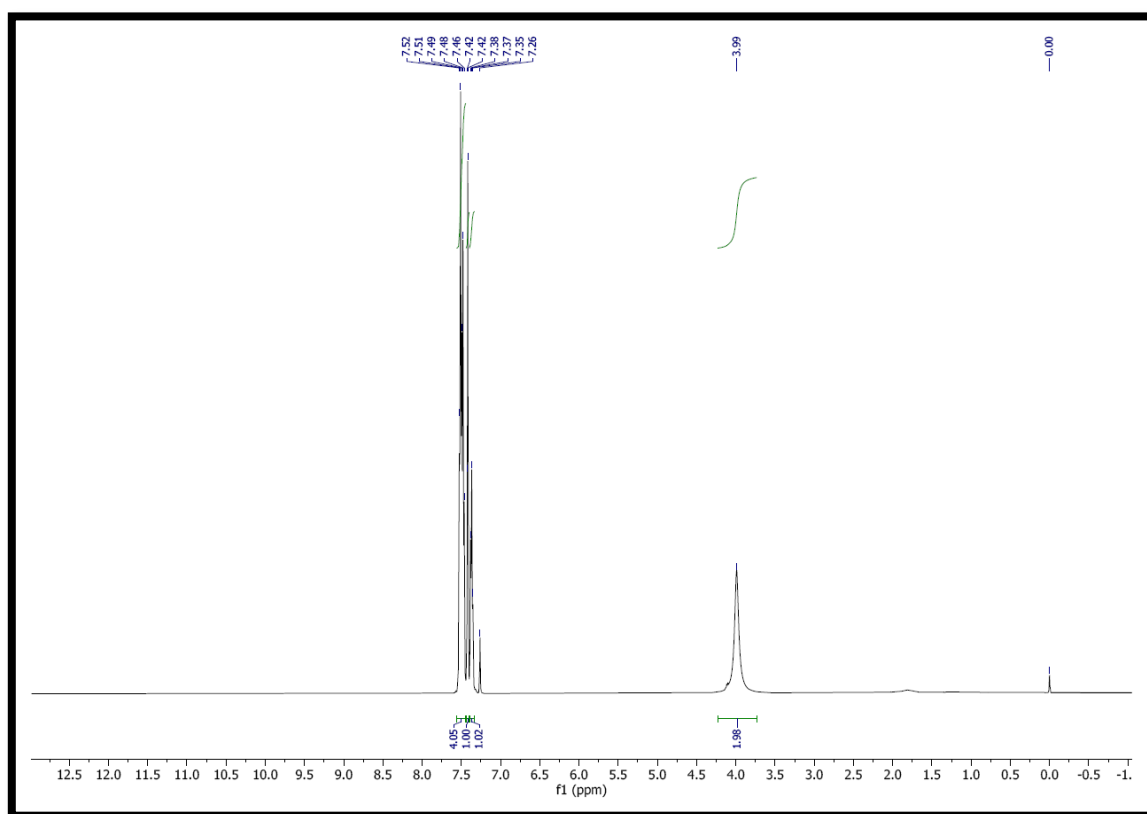

### $^{13}\text{C NMR}$ 4c

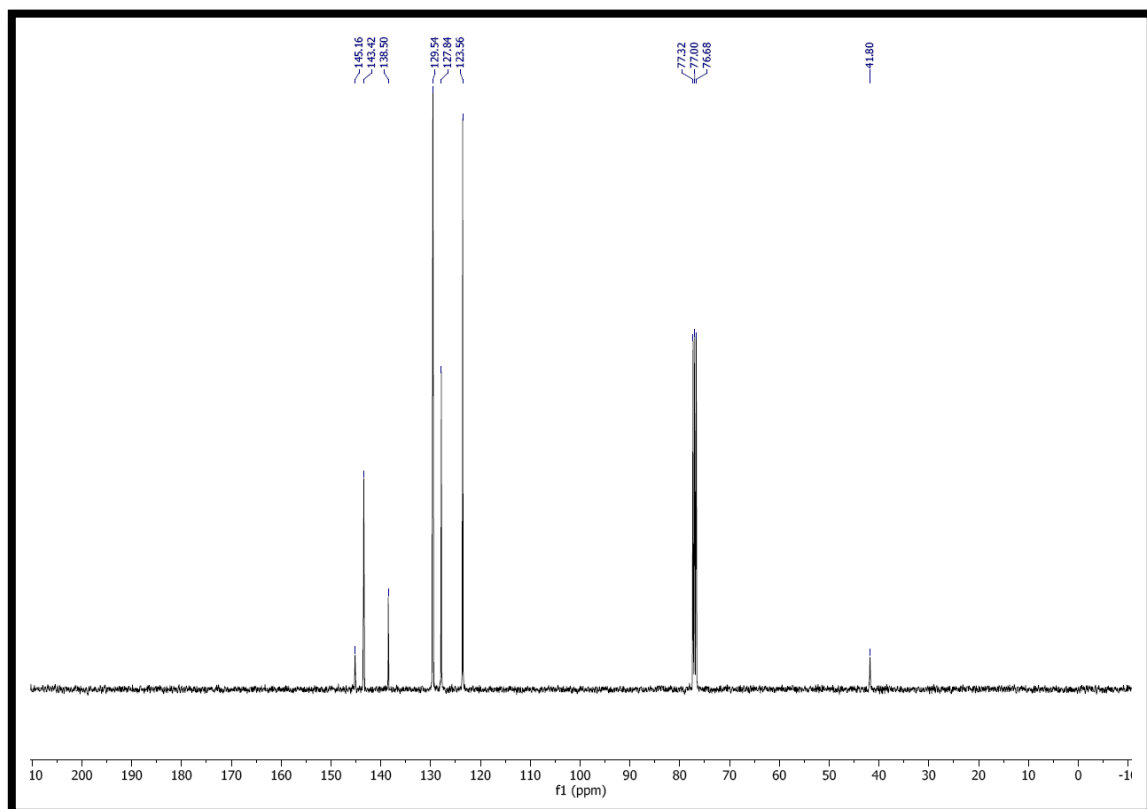

# <sup>1</sup>H NMR of 3a showing Cis and Trans mixture

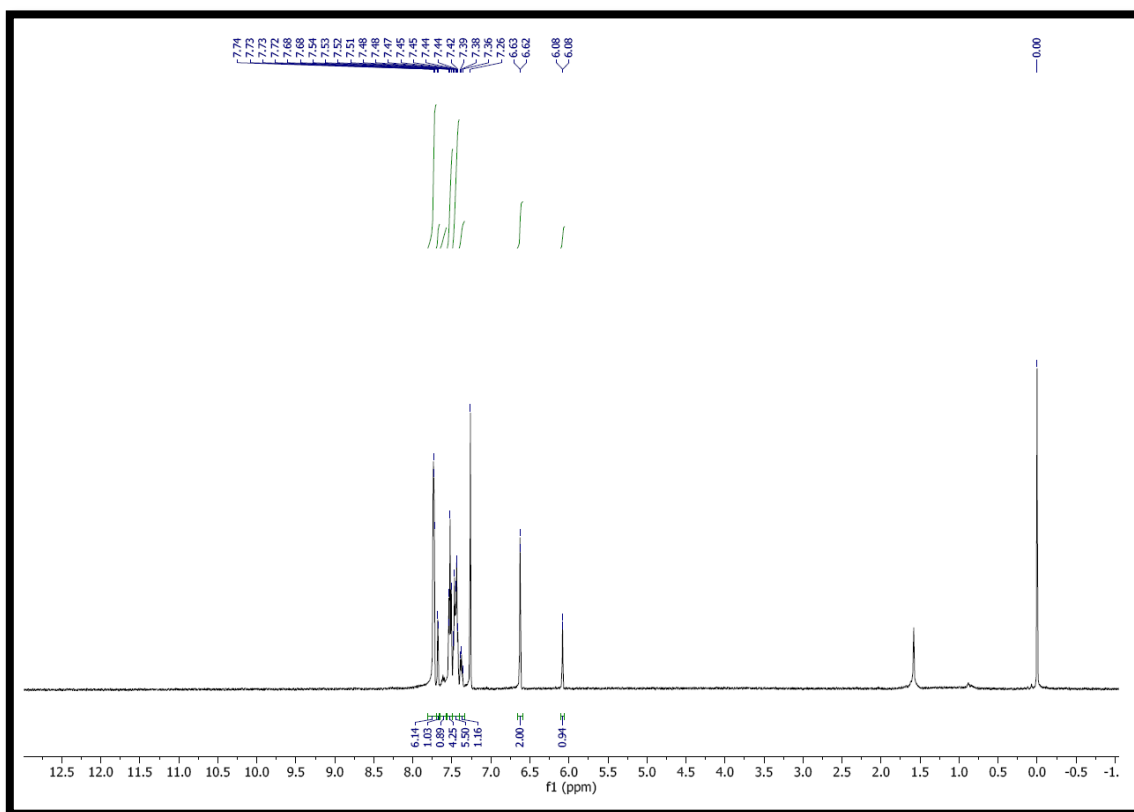

## HRMS of reaction mixture with BHT

28022023\_5\_13666

GKR-BHT\_28022023\_014 394 (3.434) AM2 (Ar.30000.0,556.22,0.00,LS 1)

1: TOF MS ES+  
8.08e6

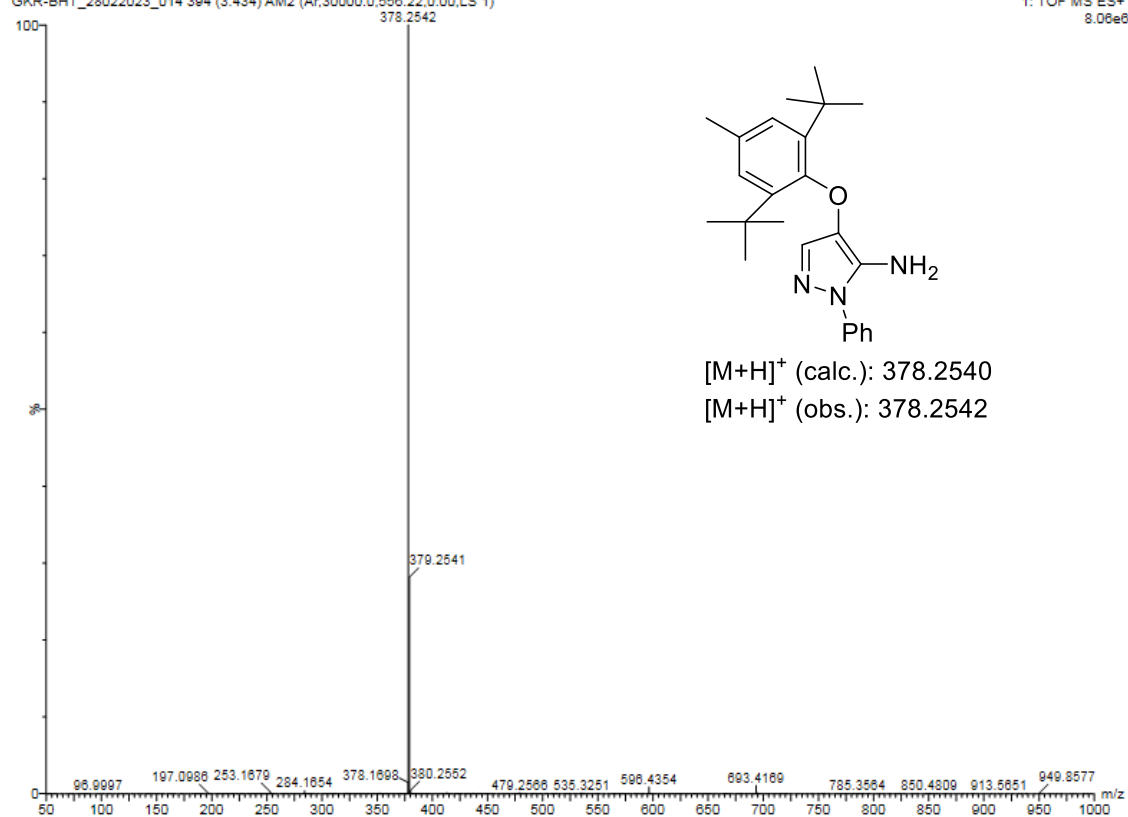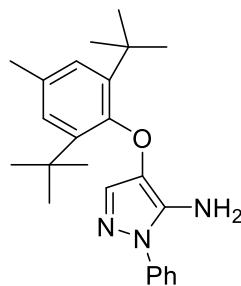

[M+H]<sup>+</sup> (calc.): 378.2540

[M+H]<sup>+</sup> (obs.): 378.2542

## HRMS of reaction mixture with TEMPO

28022023\_5\_13665

GKR-TEMPO\_28022023\_D13 375 (3.265) AM2 (Ar,30000.0,566.39,0.00,LS 1)

1: TOF MS ES+  
1.66e4

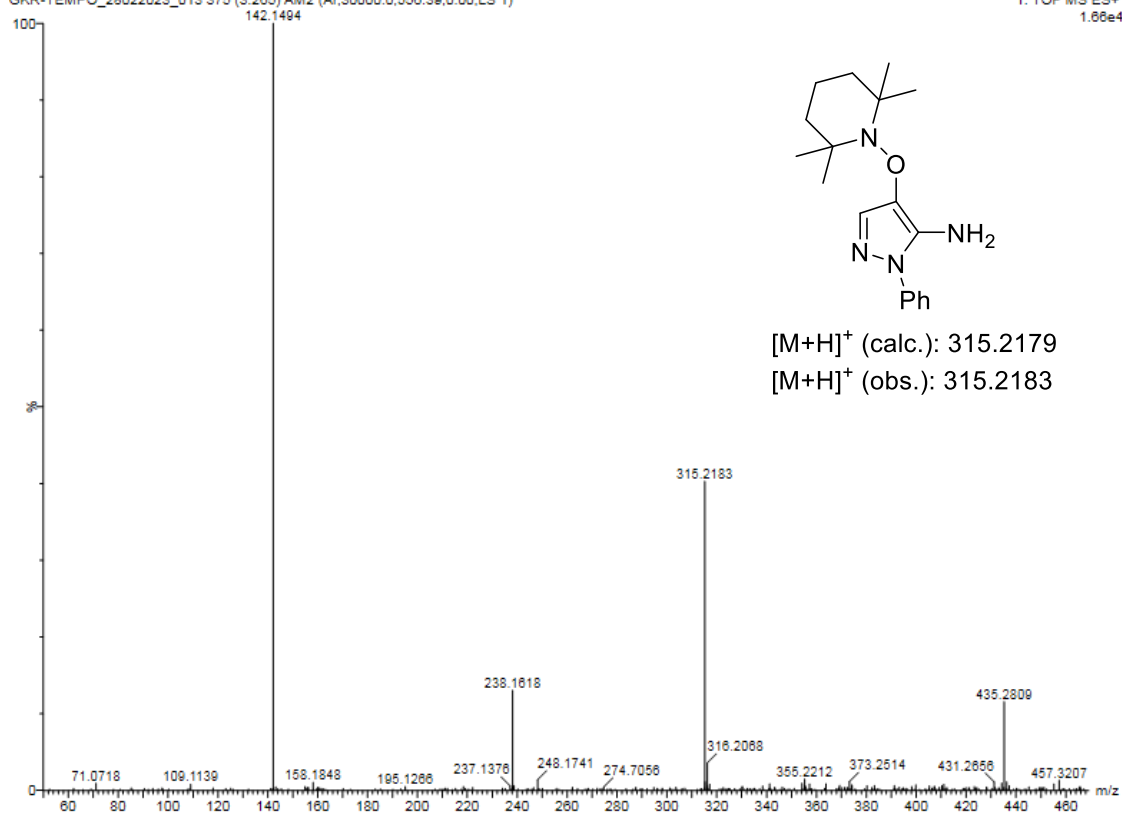



## HRMS crude reaction mixture: intermediate (D)

28032023\_19\_13914

GKR-557-60MIN\_28032023\_019 330 (2.879) AM2 (Ar,30000.0,556.23,0.00,LS 1); Cm (290:383)

1: TOF MS ES+  
3.06e3

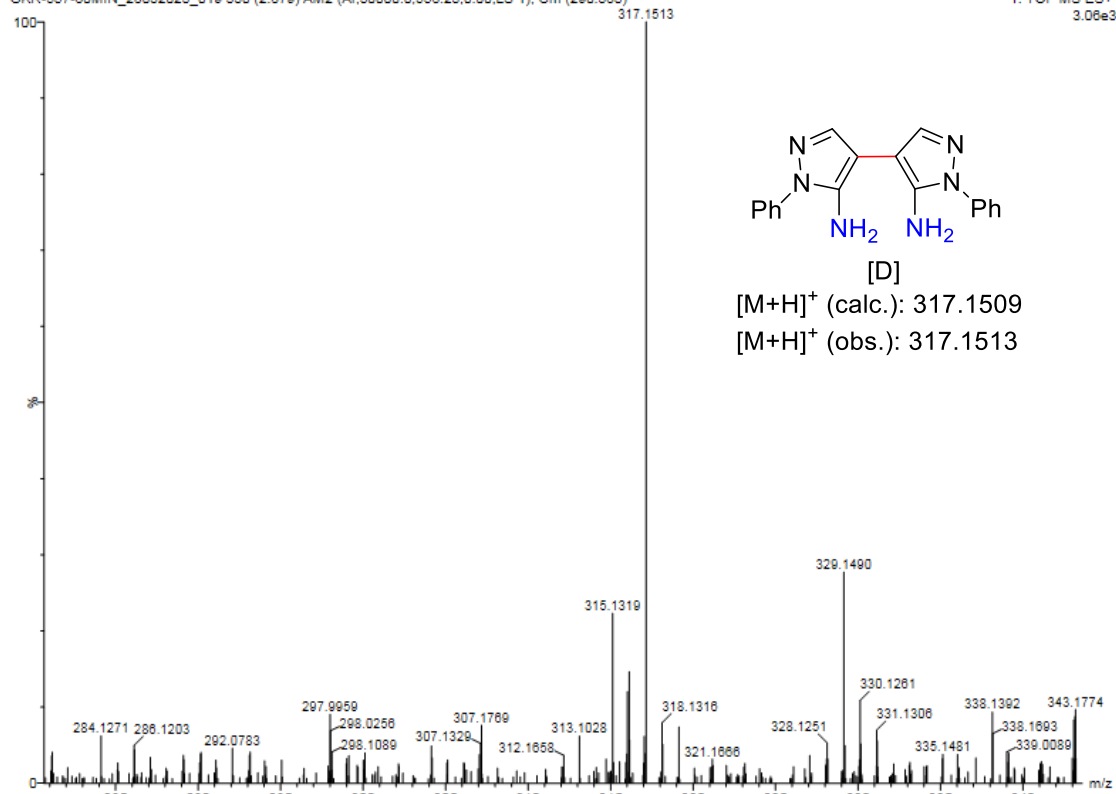

## HRMS of crude reaction mixture: intermediate (F)

28032023\_19\_13914

GKR-567-60MIN\_28032023\_019 404 (3.520) AM2 (Ar,30000.0,566.24,0.00,LS 1); Cm (381:426)

1: TOF MS ES+  
4.69e3

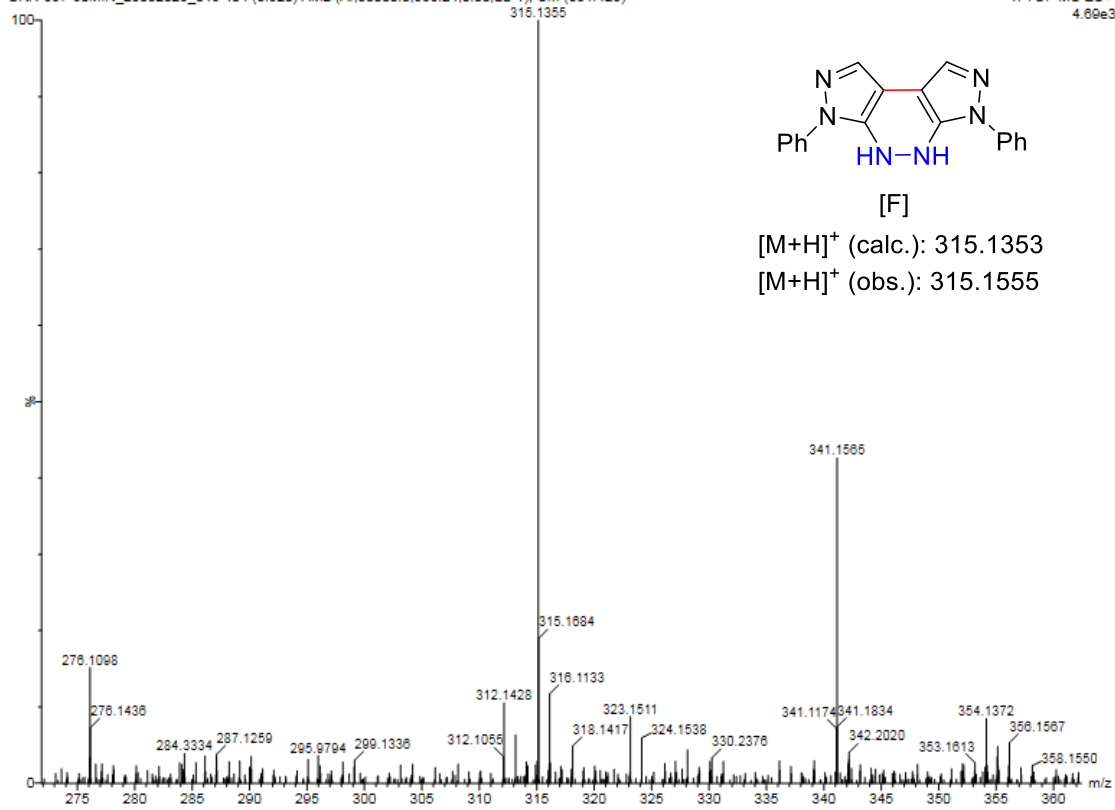

## HRMS of Z-isomer (3a')

15122022\_177\_002

GKR-552\_15122022\_002 432 (3.780) AM2 (Ar,30000.0,558.29,0.00,LS 1)

1: TOF MS ES+  
1.03e5

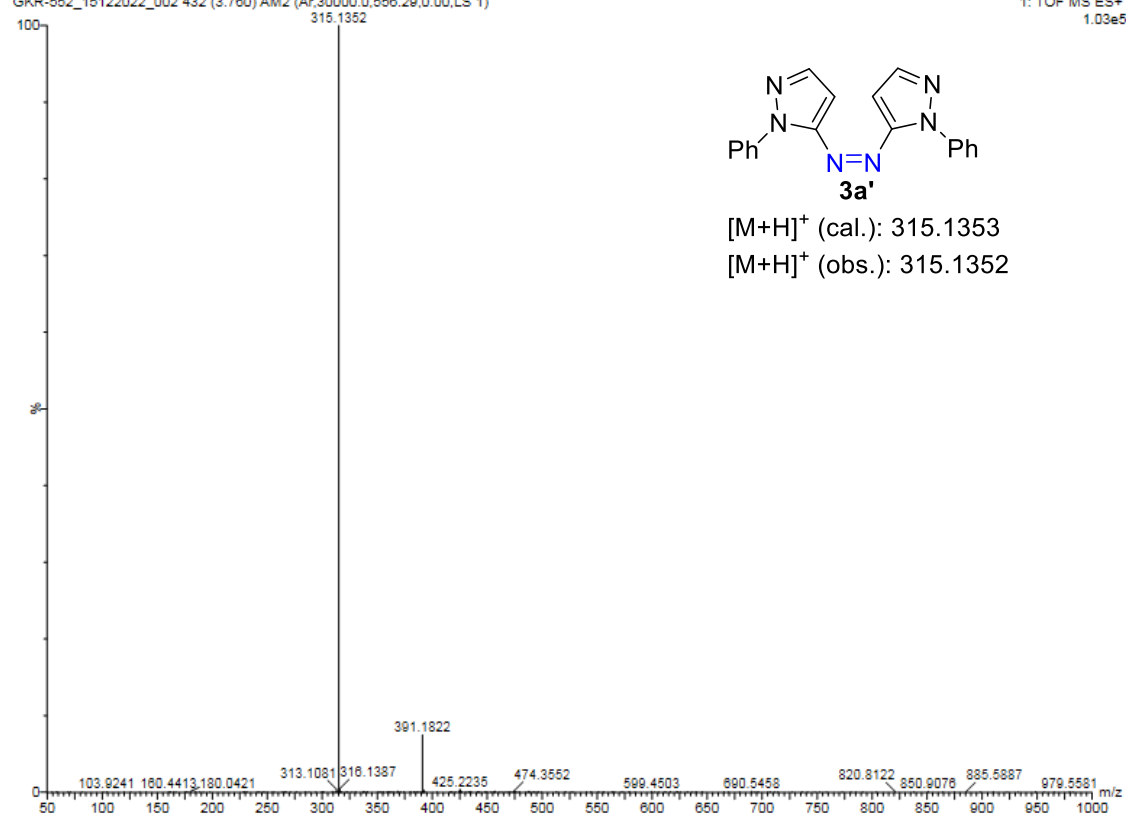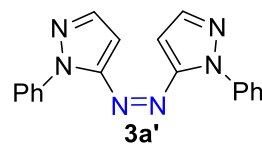

[M+H]<sup>+</sup> (cal.): 315.1353

[M+H]<sup>+</sup> (obs.): 315.1352
